# Supplementary material
Source: publisher figshare collection journal article supplement (https://tandf.figshare.com/ndownloader/files/16126379)
Supplement: Supplementary file 1 [file 16126379]

**Synthesis of novel 3-[(2*R**)-2-[(2*S**)-6-fluoro-3,4-dihydro-2*H*-chromen-2-yl]-2-hydroxyethyl]-urea/thiourea derivatives and evaluation of their antimicrobial activities**

**Madhava Rao Mannama,b, Srimurugan S.b, Pramod Kumarb, Naga Raju Chamarthic, Prasad K. R. Sa***

aDepartment of Chemistry, Koneru Lakshmaiah Education Foundation,Vaddeswaram –522 502, Andhra Pradesh, India

bChemical Research Division, API R&D Centre, Micro Labs Ltd., Bommasandra–Jigani Link Road, Bangalore–560 105, Karnataka, India

cDepartment of Chemistry, Sri Venkateswara University, Tirupathi-517 502, Andhra Pradesh, India

Email: krsprasad_fed@kluniversity.in

**Supplemental Materials**

**1.0 Characterization Data of Known Compounds 2a, 2b, 3 and 4:**

**[1*S**(*R**)]-6-fluoro-3,4-dihydro-2-(oxiran-2-yl)-2*H*-chromene (2a).** [1]

Yield 12 g, 45%, light yellow colour liquid, IR (KBr, υ, cm–1): 3061, 2933, 1504, 1217, 1139, 1049. 1H NMR, (400 MHz; CDCl3), δ , ppm (*J*, Hz): 1.84-1.94 (1H, m, CH2CH); 2.10-2.17 (1H, m, CH2CH); 2.76-2.90 (4H, m, Ar-CH2, oxiran CH2); 3.11-3.14 (1H, m, oxiran CH), 3.82-3.86 (1H, m, OCH); 6.74-6.79 (3H, m, Ar-H). 13C NMR (100 MHz; CDCl3), δ ppm (*J*, Hz): 24.15 (Ar-CH2CH); 24.19 (Ar-CH2); 45.70 (oxiran CH2); 52.95 (oxiran CH); 75.61(Ar-OCH); 114.12 (d, *J* = 23, CHC-F); 115.34 (d, *J* = 22.0, CHC-F); 117.56 (d, *J* = 8.0, CHCHC-F); 122.92 (d, *J* = 7.0, CHCHC-F); 150.10 (d, *J* = 2.0, CCHCHC-F); 158.01, 155.64 (d, *J* = 237.0, CHC-F). HRMS (FAB) Calc: C11H11FO2:194.0743; Found m/z 195.0764[M+H]+.

**[1*R**(*R**)]-6-fluoro-3,4-dihydro-2-(oxiran-2-yl)-2*H*-chromene (2b).** [2]

Yield 8 g, 35%, light yellow colour liquid, IR (KBr, υ, cm–1): 3061, 2931, 1622, 1494, 1217, 1139, 1047. 1H NMR (400 MHz; CDCl3), δ, ppm (*J*, Hz): 1.86-1.97 (1H, m, CH2CH); 2.01-2.06 (1H, m, CH2CH); 2.76-2.88 (4H, m, Ar-CH2, oxiran CH2); 3.17-3.20 (1H, m, oxiran CH), 3.82-3.86 (1H, m, OCH); 6.72-6.75 (1H, d, *J*=12.0, Ar-H) 6.78-6.8 (2H, dd, *J*= 0.8, 1.2, Ar-H) . 13C NMR (100 MHz; CDCl3), δ, ppm δ ppm (*J*, Hz): 24.05 (Ar-CH2CH); 24.45 (Ar-CH2); 43.74 (oxiran CH2); 53.65(oxiran CH); 75.93(Ar-OCH); 114.12 (d, *J* = 23.0, CHC-F); 115.19 (d, *J* = 23.0, CHC-F); 117.73 (d, *J* = 8.0, CHCHC-F); 122.59 (d, *J* = 8.0, CHCHC-F); 150.24 (d, *J* = 2.0, CCHCHC-F ); 158.01, 155.64 (d, *J* = 237.0, CHC-F). HRMS (FAB) Calc: C11H11FO2:194.0743; Found m/z 195.0764[M+H]+.

**(*R**)-2-(benzylamino)-1-((*S**)-6-fluoro-3,4-dihydro-2*H*-chromen-2-yl)ethanol (3).** [3]

1H NMR (400 MHz; CDCl3), δ, ppm (*J*, Hz): 1.85-1.87 (1H, m, CH2CH); 2.14-2.18 (1H, m, CH2CH); 2.44 (2H, brs, -OH, -NH); 2.79-2.89 (3H, m, Ar-CH2, CHNH); 3.00-3.04 (1H, dd, *J* = 3.2, 3.6, CHNH ); 3.77-3.93 (4H, m, OCH, CHOH ArCH2NH); 6.72-6.80 (3H, m, Ar-H); 7.29-7.39 (5H, m, Ar-H). 13C NMR (100 MHz; CDCl3), δ, ppm (*J*, Hz): 23.20 (Ar-CH2CH); 24.54 (Ar-CH2); 50.53 (Ar-CH2NH); 53.79 (CHCH2NH); 70.75 (CHOH); 77.62 (Ar-OCH); 113.86 (d, *J* = 22.0, CHC-F); 115.33 (d, *J* = 23.0, CHC-F); 117.46 (d, *J* = 8.0, CHCHC-F ); 123.35(d, *J* = 7.0, CHCHC-F); 127.27; 128.17; 128.55; 139.68; 150.47 (d, *J* = 2.0, CCHCHC-F); 155.57 (d, *J* = 237.0, CHC-F). HRMS (FAB) Calc: C18H20FNO:301.1478; Found m/z 302.1498[M+H]+.

**(*S**)-2-amino-1-((*R**)-6-fluorochroman-2-yl)ethanol (4).** [2]

In a three–neck round bottom flask, the compound (*R**)-2-(benzylamino)-1-((*S**)-6-fluoro-3,4-dihydro-2*H*-chromen-2-yl)ethanol (**3**) (12.0 g, 0.039 mol) in methanol (100 mL) was taken at 25-30 °C. The 10% palladium on carbon (1.2 g, 10%) was added to the reaction mass at 25-30 °C. Later, ammonium formate (5.0 g, 0.079 mol) was added in five lots to avoid the decomposition of ammonium formate at 25-30 °C. After complication of reaction on TLC, the catalyst was filtered through hyflo under nitrogen and washed the hyflo bed with methanol (24 mL) at 25-30 °C. The solvent was evaporated under vacuum below 50 °C. To the crude residue, diisopropyl ether (36 mL) was added and kept under stirring for 30 min. The solid was filtered and washed with diisopropyl ether (12 mL) at 25-30 °C. The obtained solid was dried under vacuum at 50-55 °C for 4 h. Off-white solid **4** was obtained. Dry weight: 7.7 g, 90 %.

IR (KBr, υ, cm–1): 3363, 2902, 1492, 1215, 1010. 1H NMR (400 MHz; DMSO-d6), δ, ppm (*J*, Hz)14: 1.42 (2H, brs , -NH2); 1.62-1.72 (1H, m, CH2CH); 1.82-2.07 (1H, m, CH2CH); 2.55-2.60 (1H, m, Ar-CH); 2.69-2.79 (3H, m, Ar-CH2, CHNH2 ); 3.42-3.45 (1H, m, OCH); 3.82-3.86 (1H, m, CHOH); 4.97 (1H, brs, OH); 6.69-6.73 (1H, m, Ar-H); 6.84-6.91(2H, m, Ar-H). 13C NMR (100 MHz; DMSO-d6), δ, ppm (*J*, Hz): 22.25 (Ar-CH2CH); 23.81 (Ar-CH2); 44.40 (CHCH2NH); 73.21 (CHOH); 76.80 (Ar-OCH); 113.52 (d, *J* = 23.0, CHC-F); 115.22 (d, *J* = 23.0, CHC-F); 117.25 (d, *J* = 8.0, CHCHC-F); 123.83 (d, *J* = 8.0, CHCHC-F); 150.67 (d, *J* = 2.0, CCHCHC-F ); 156.93 (d, *J* = 234.0, CHC-F). LC-MS m/z (rel, %):212.14 [M+H]+ (100). HRMS (FAB) Calc: C11H14FNO2:211.1009; Found m/z 212.1041[M+H]+.

**2.0 Biological activity:**

**
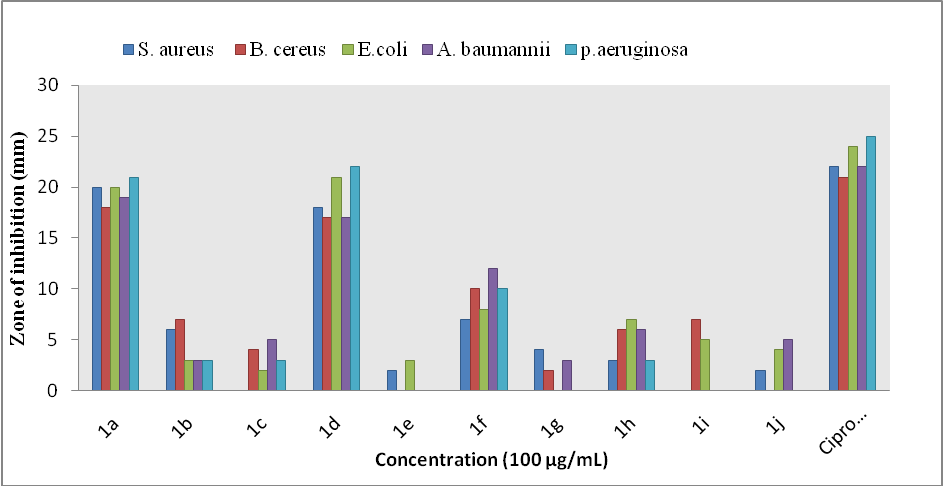
**

**Figure S 1:** Biological activity of synthesized compounds (**1a-j**) against fungal strains


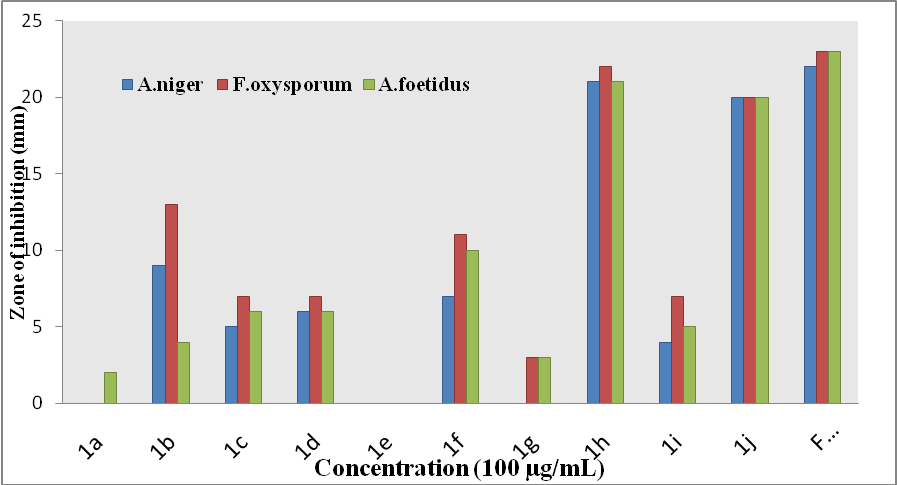


**Figure S 2:** Biological activity of synthesized compounds (**1a-j**) against fungal strains


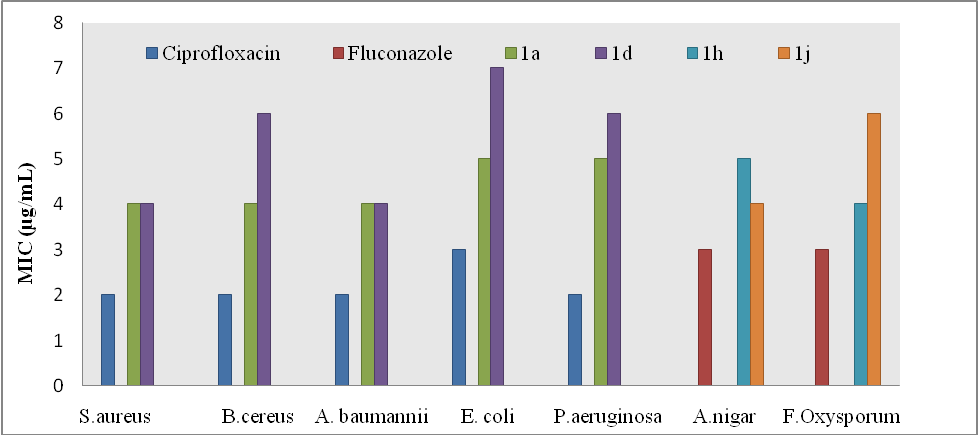


**Figure S 3:** Minimum inhibitory concentration (MIC) of lead compounds (**1a, 1d, 1h and 1j**) against bacterial strains and fungal strains

**
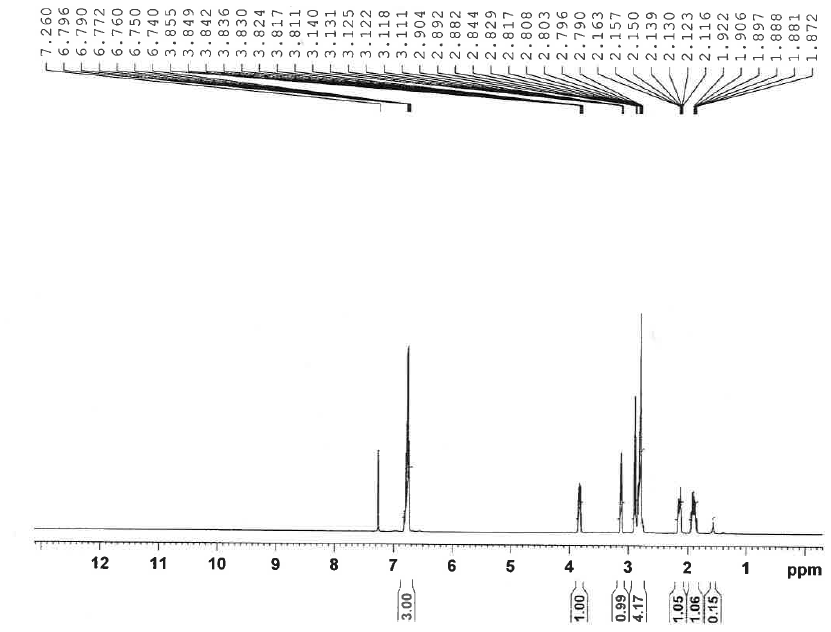
**

**Figure S 4:** 1H NMR Spectrum of compound 2a[1]


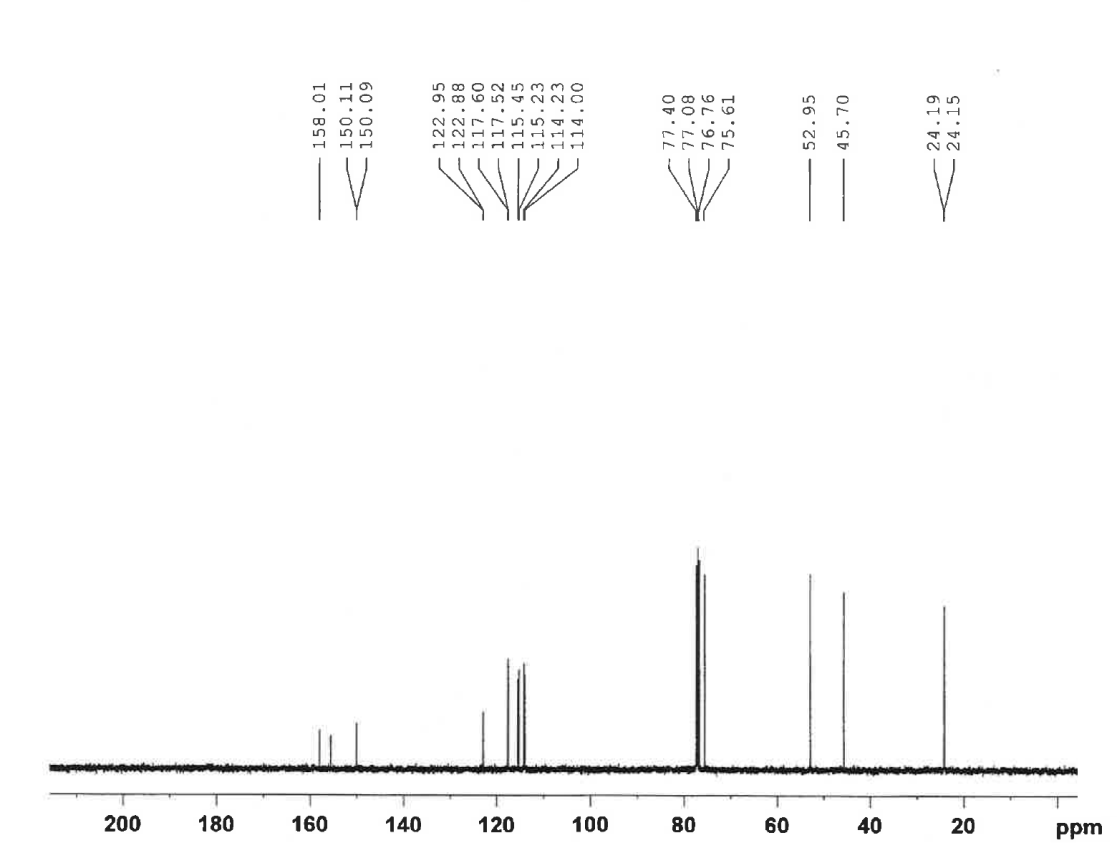


**Figure S 5:** 13C NMR Spectrum of compound 2a[1]

**
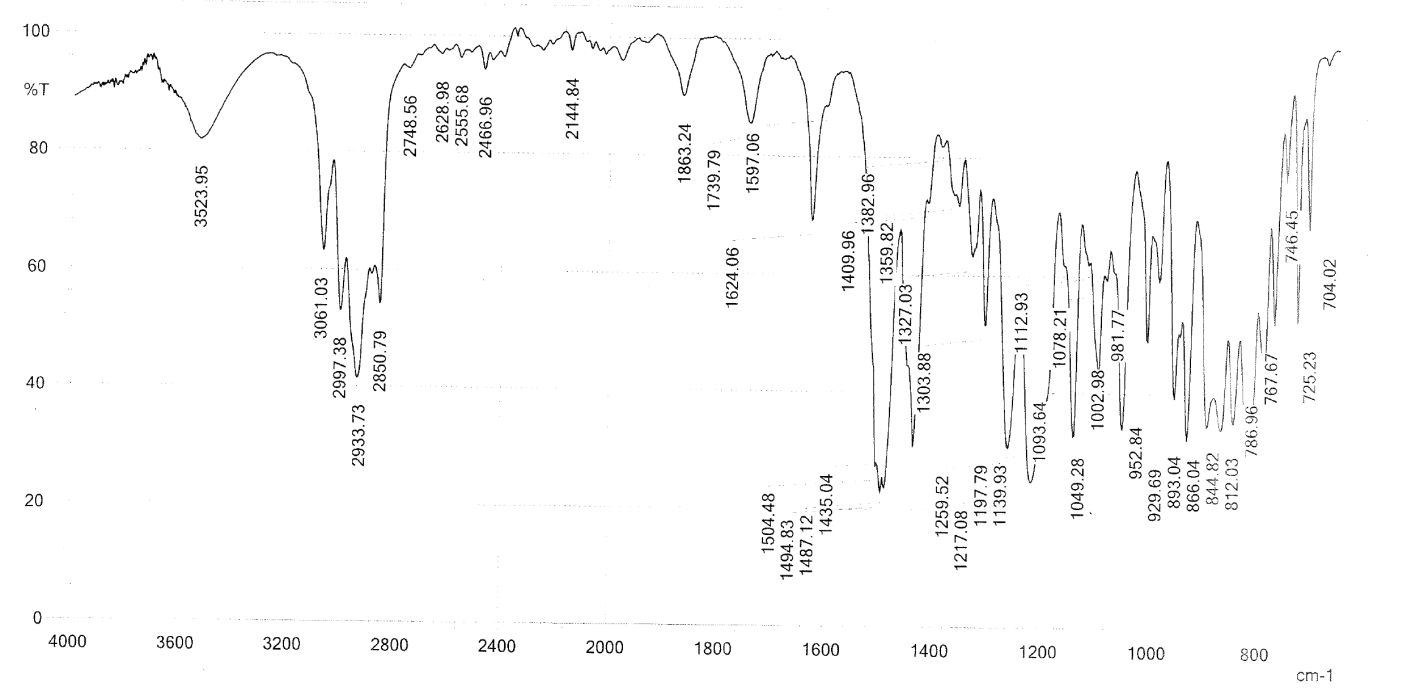
**

**Figure S 6:** FT-IR Spectrum of compound 2a


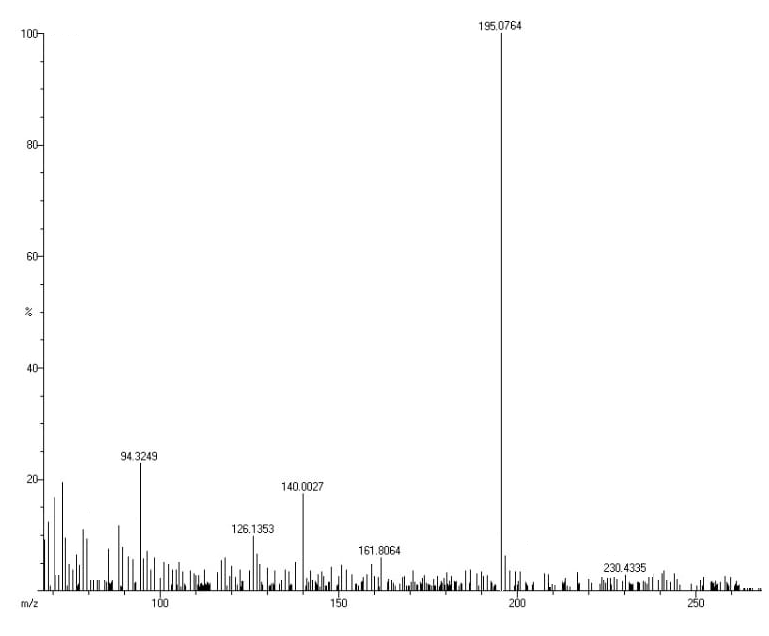


**Figure S 7:** HRMS Spectrum of compound 2a

**
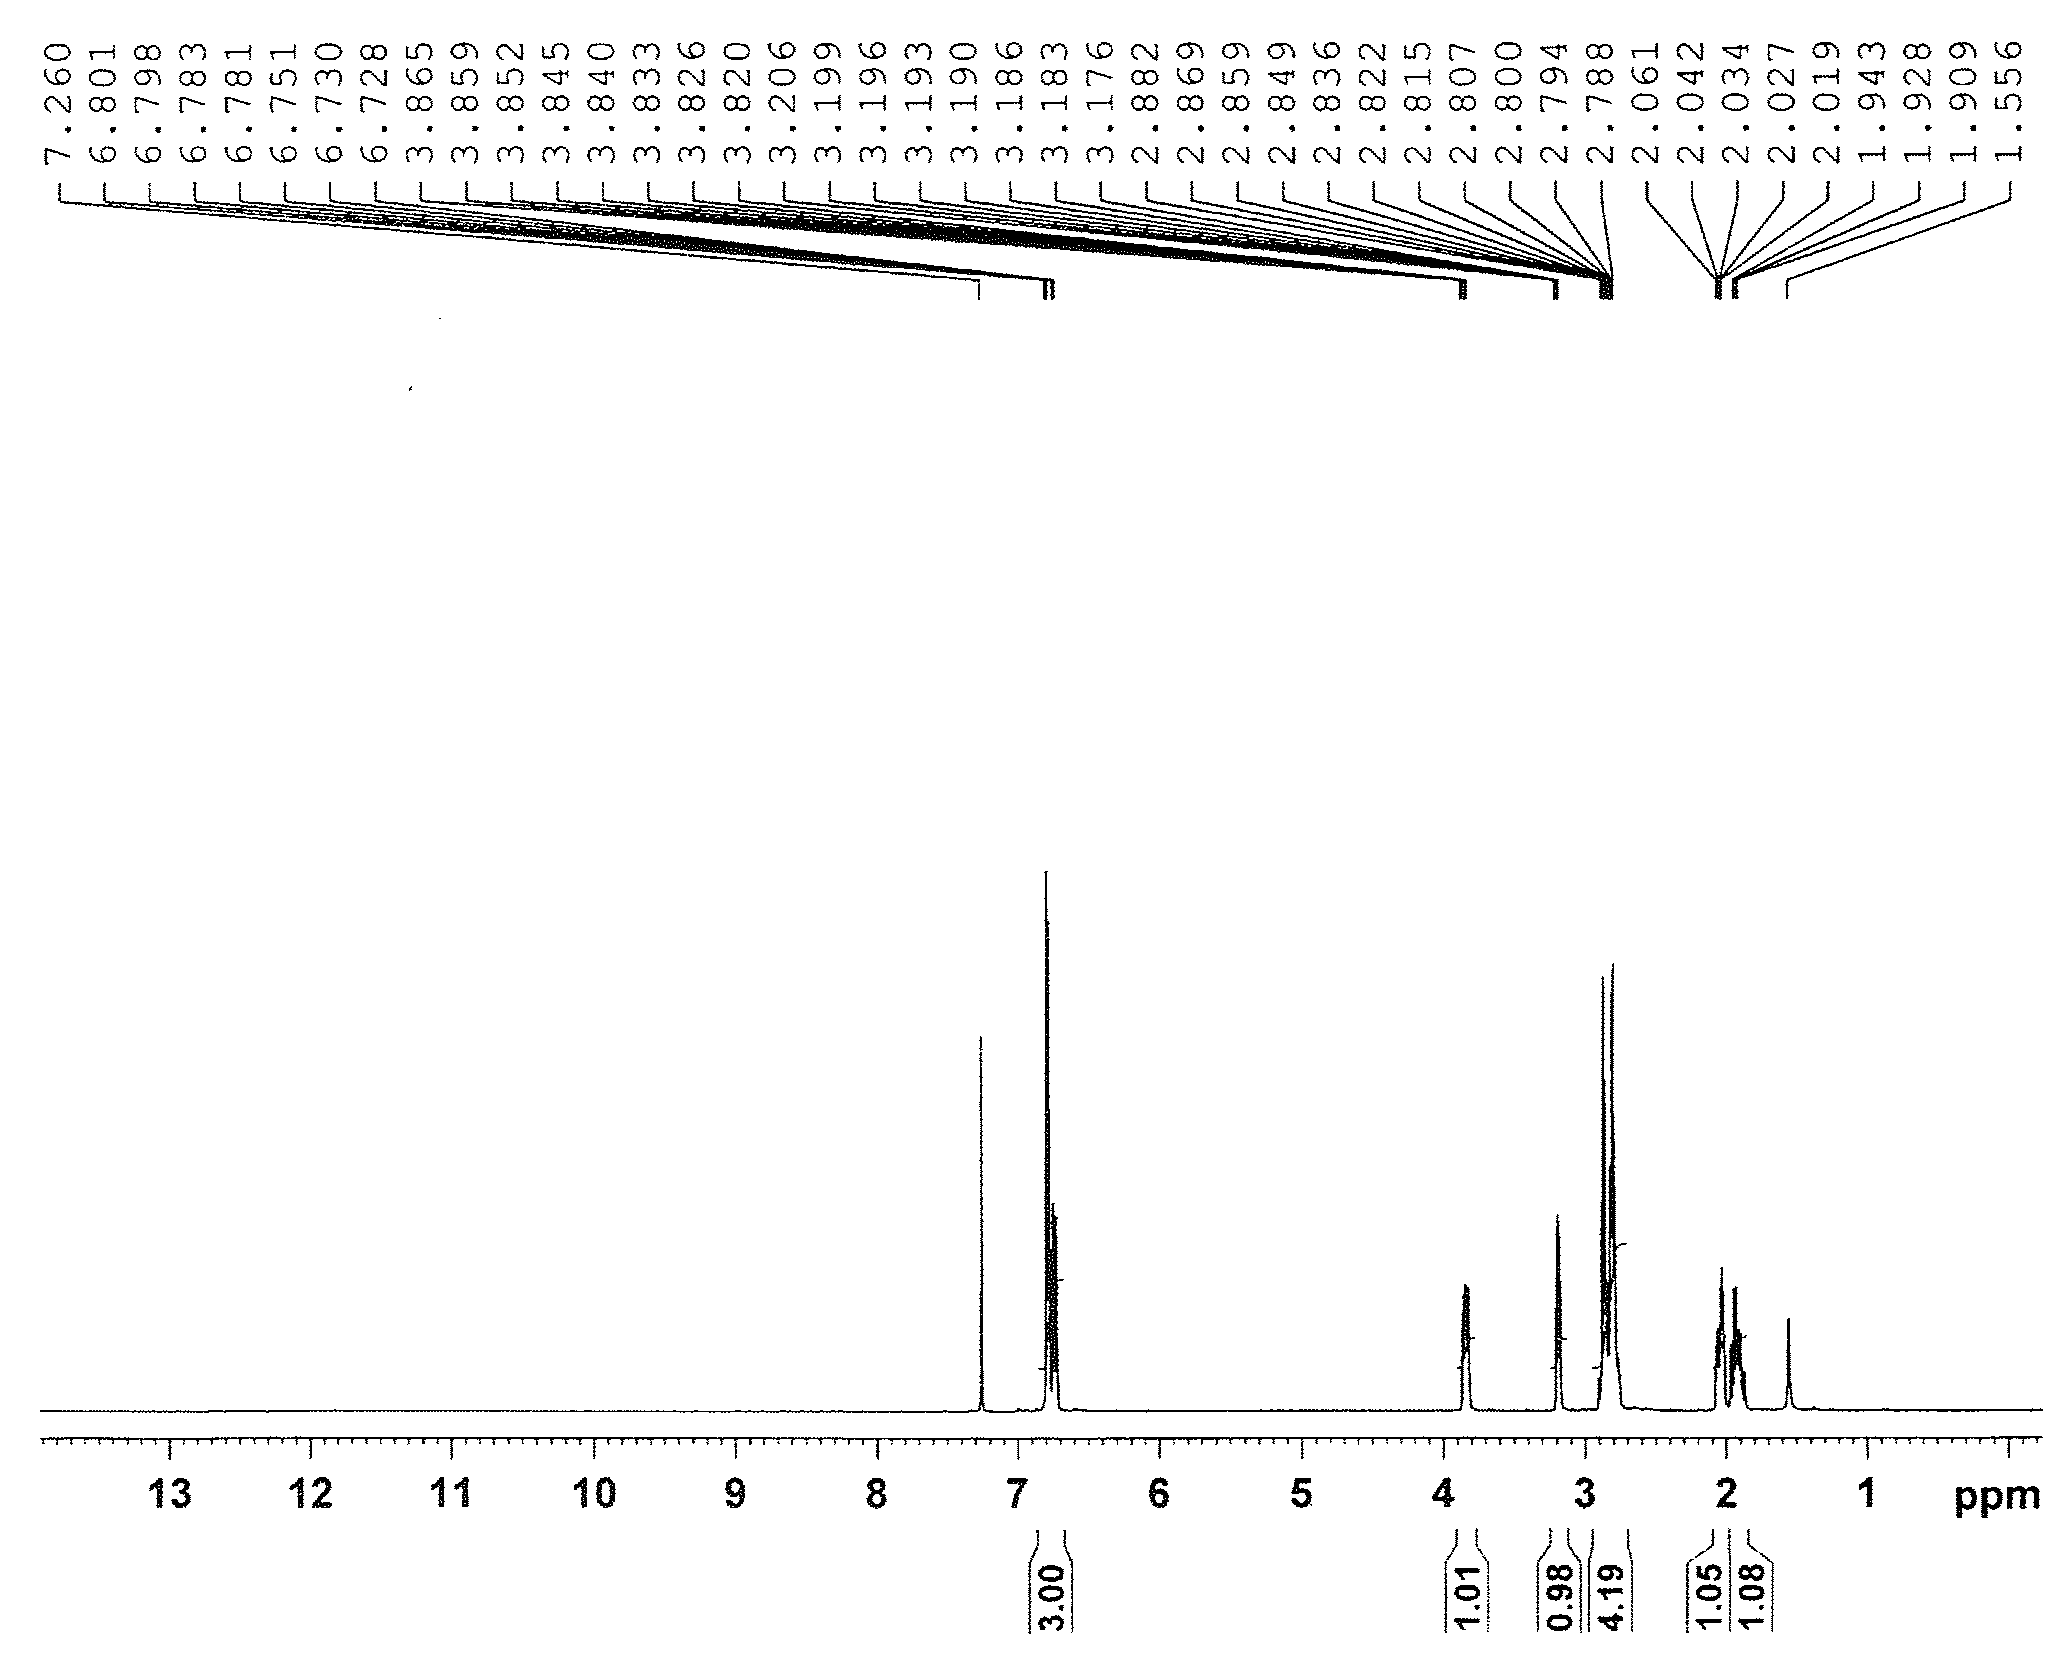
**

**Figure S 8:** 1H NMR Spectrum of compound 2b[2]

**
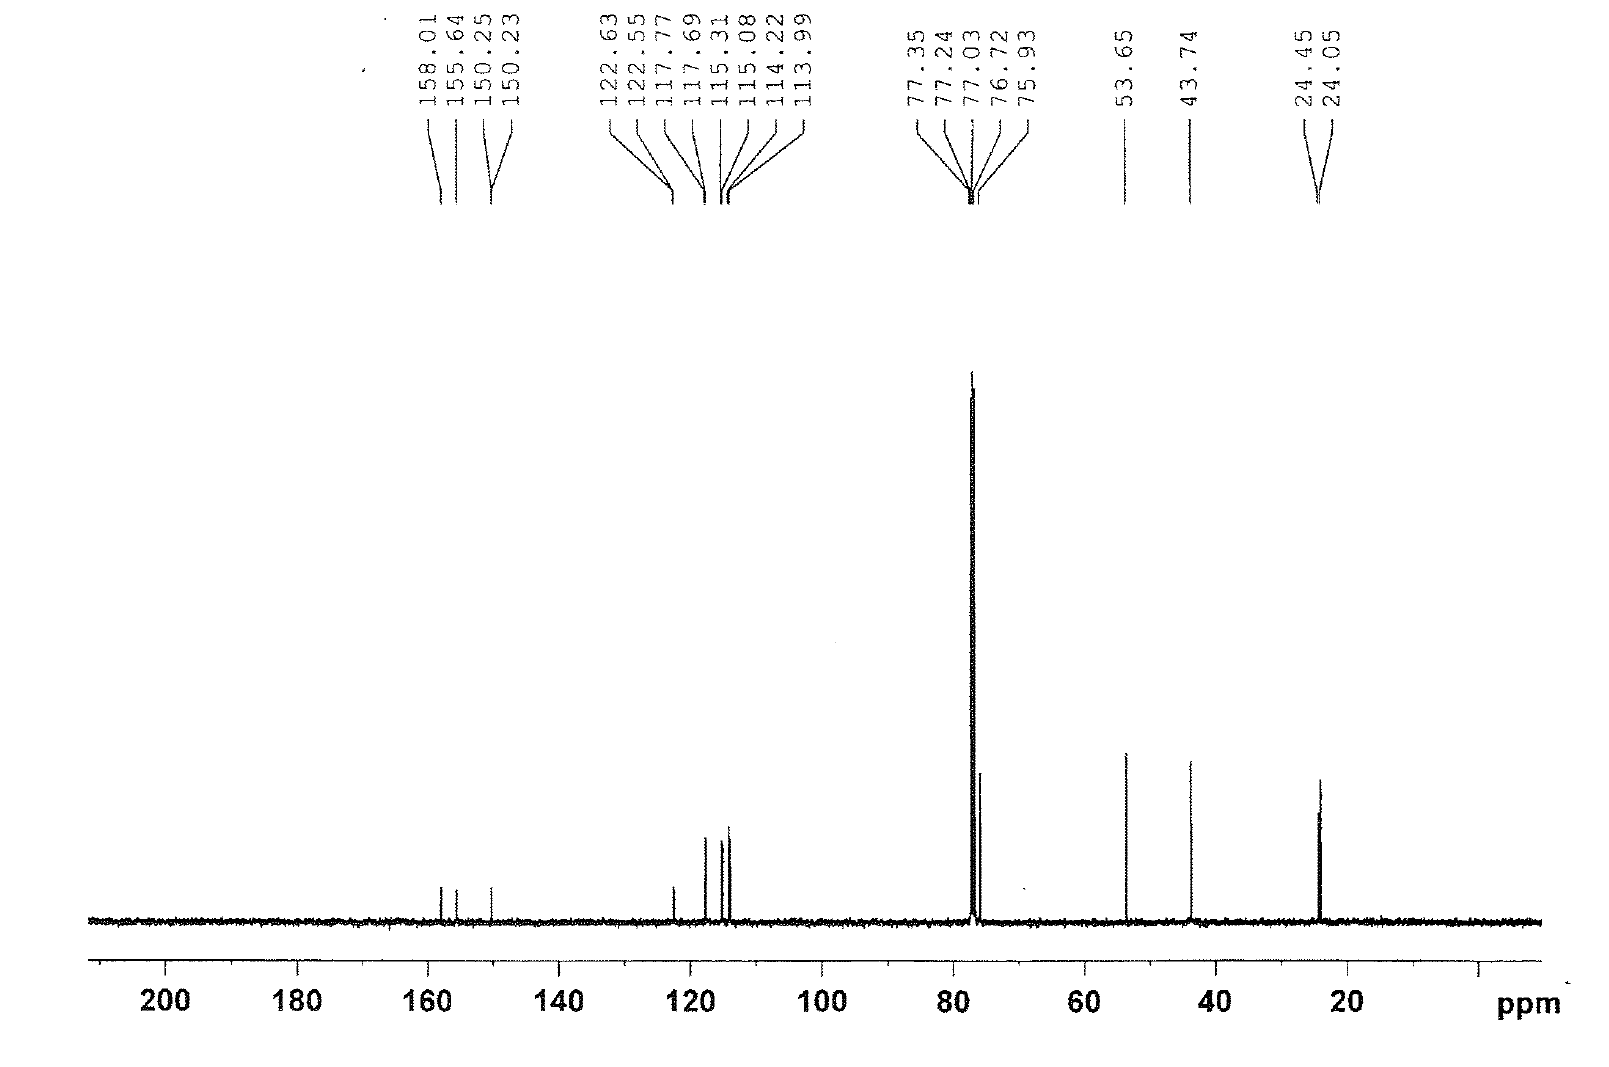
**

**Figure S 9:** 13C NMR Spectrum of compound 2b[2]

**
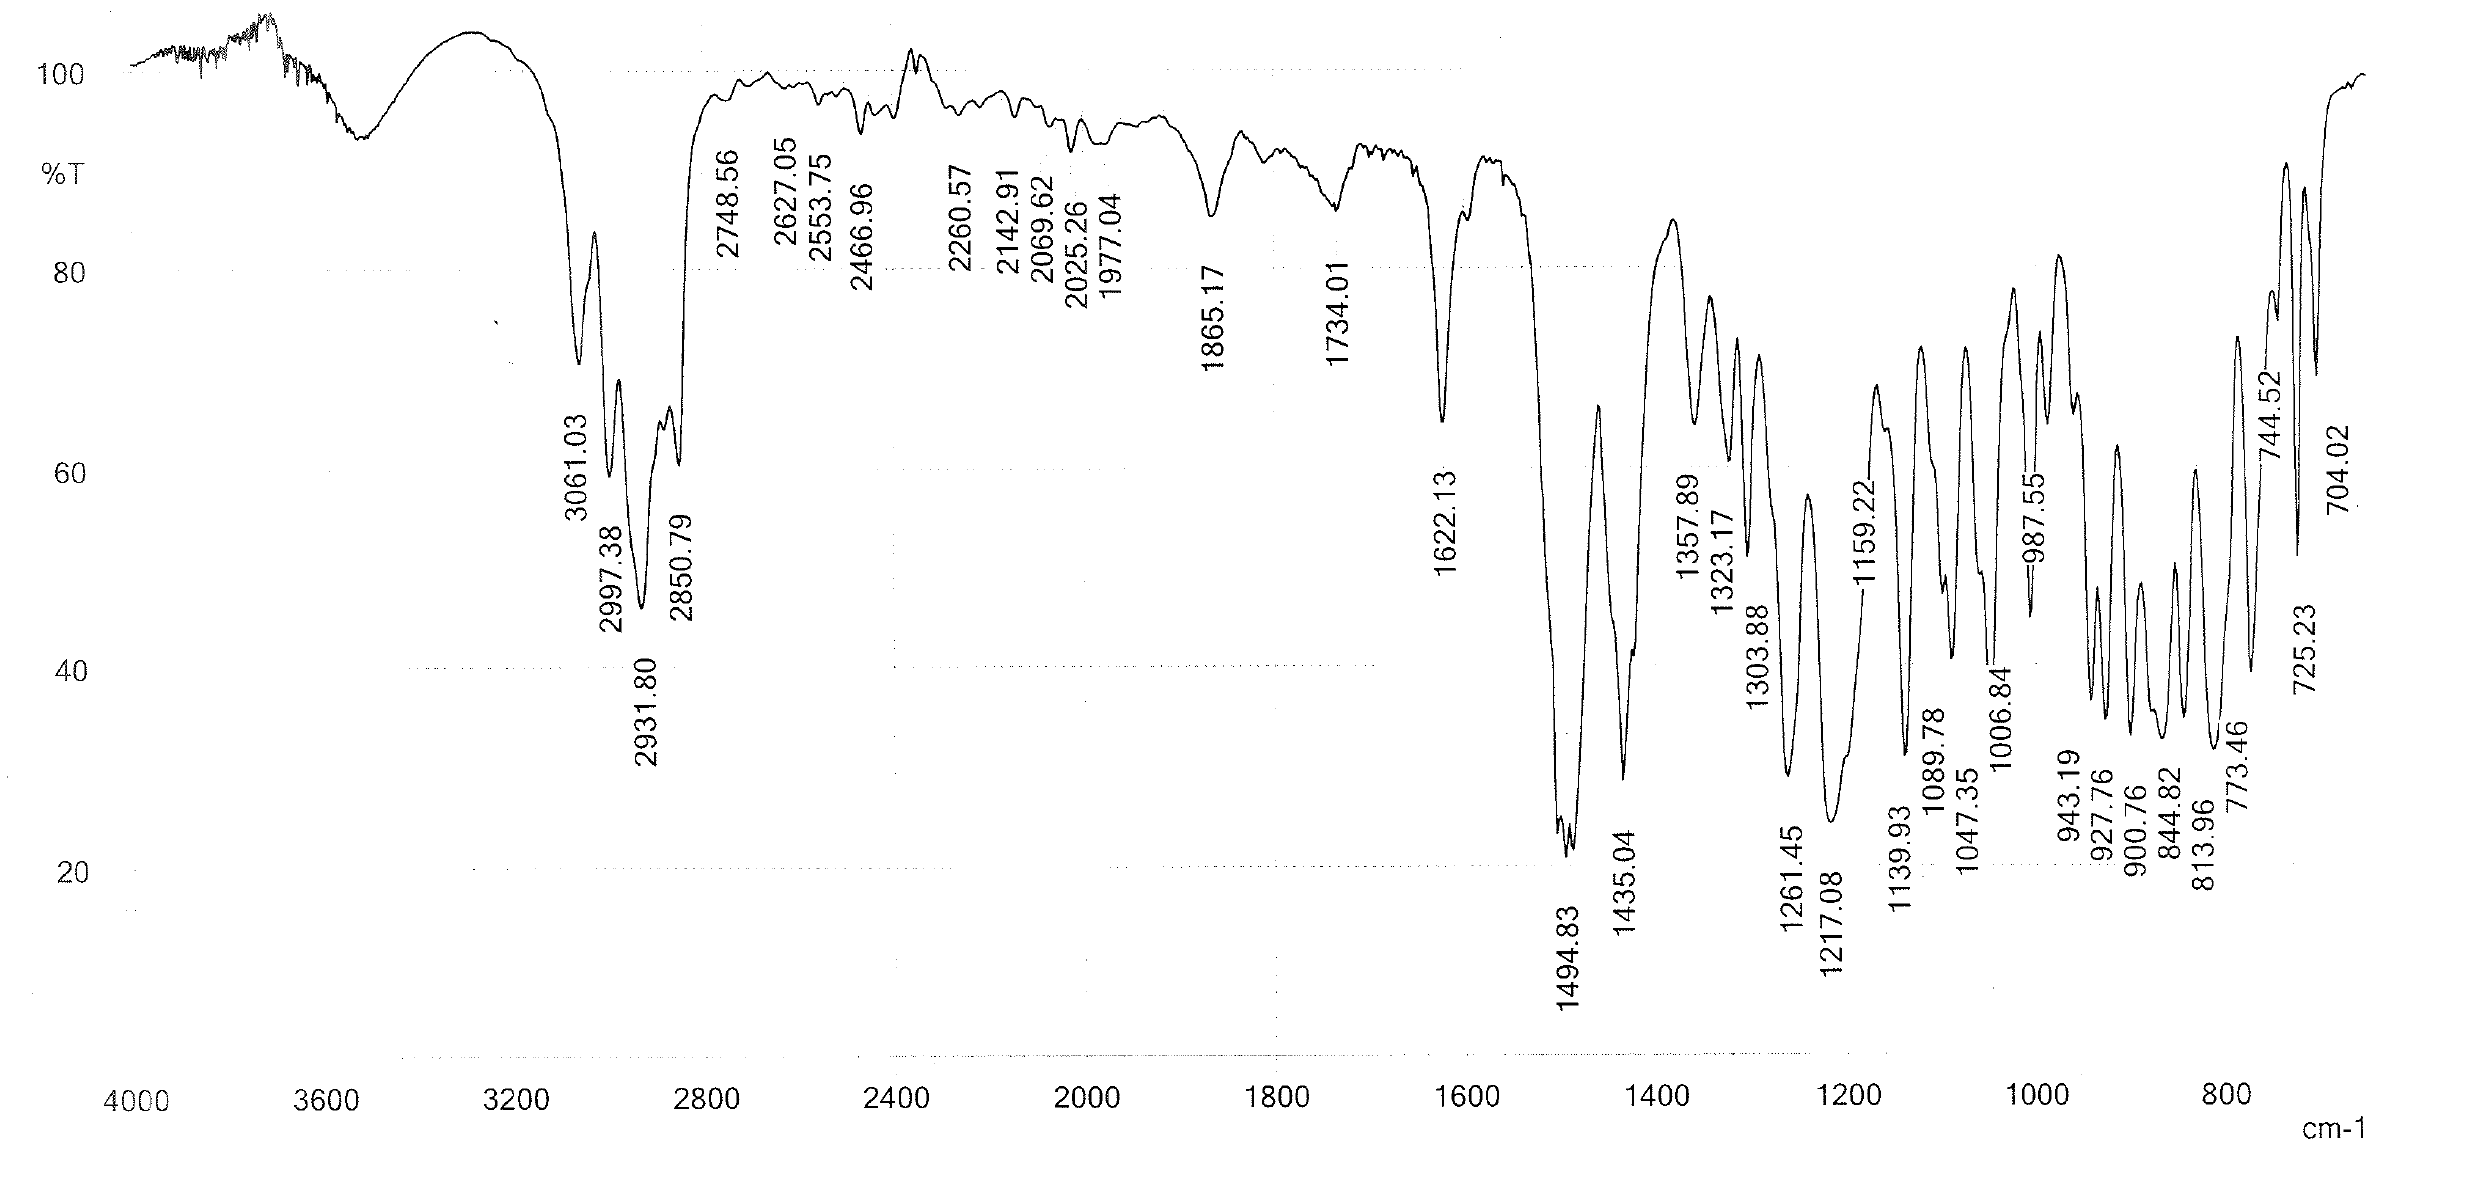
**

**Figure S 10:** FT-IR Spectrum of compound 2b[1]


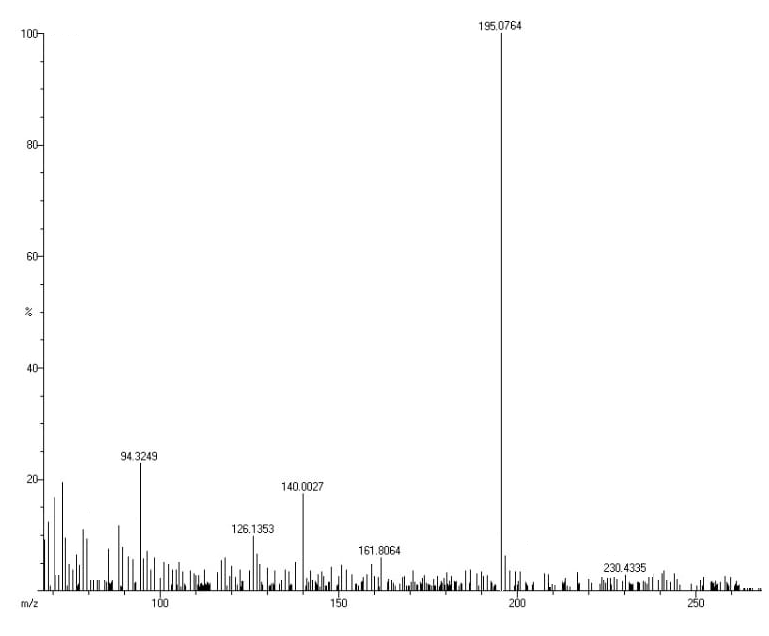


**Figure S 11:** HRMS Spectrum of compound 2b


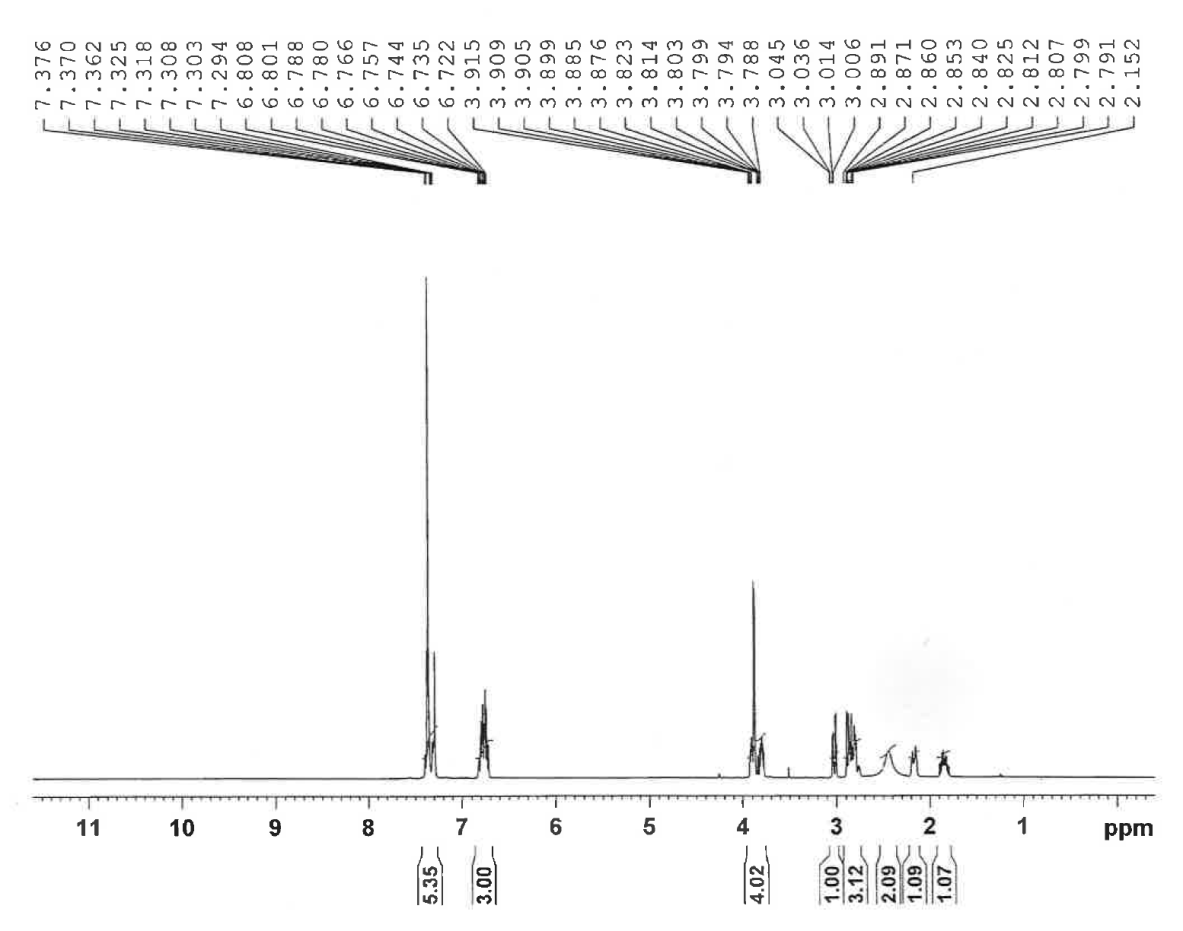


**Figure S 12:** 1H NMR Spectrum of compound 3[3]


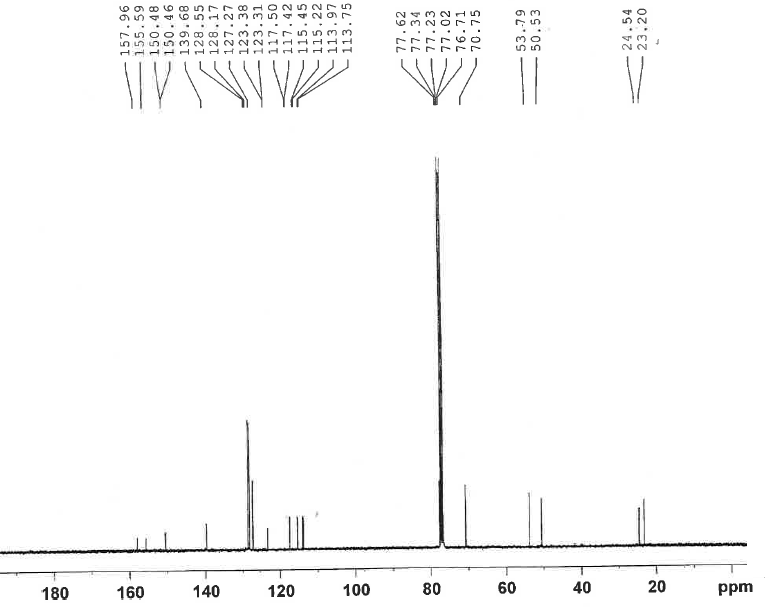


**Figure S 13:** 13C NMR Spectrum of compound 3[3]


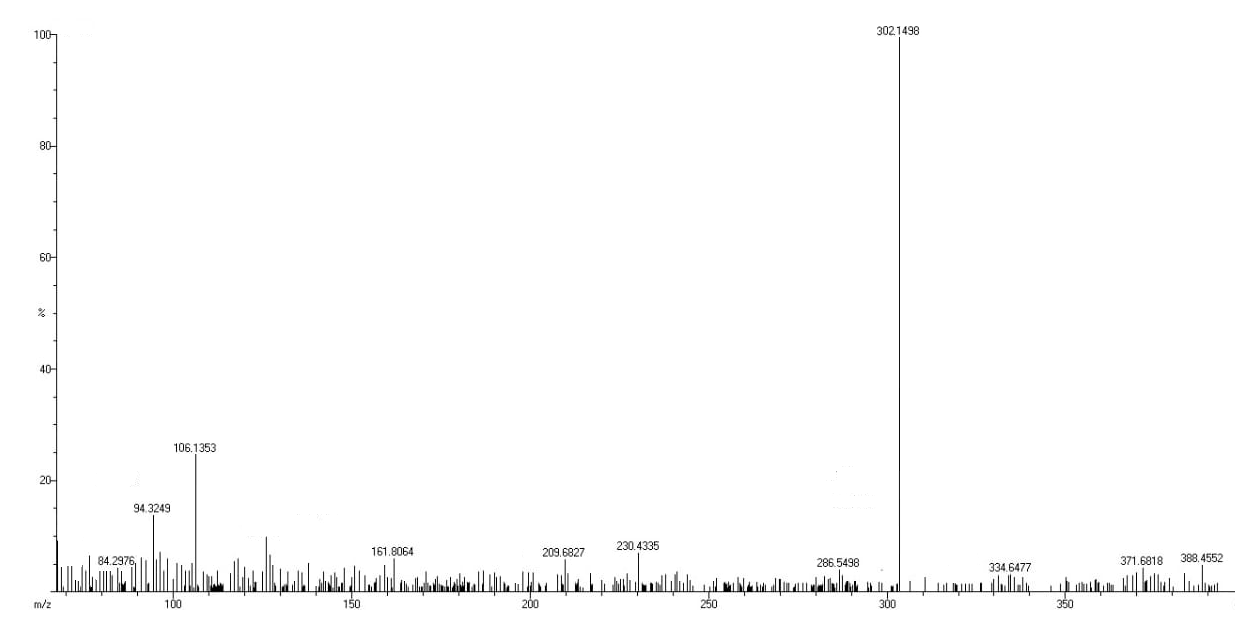


**Figure S 14:** HRMS Spectrum of compound 3


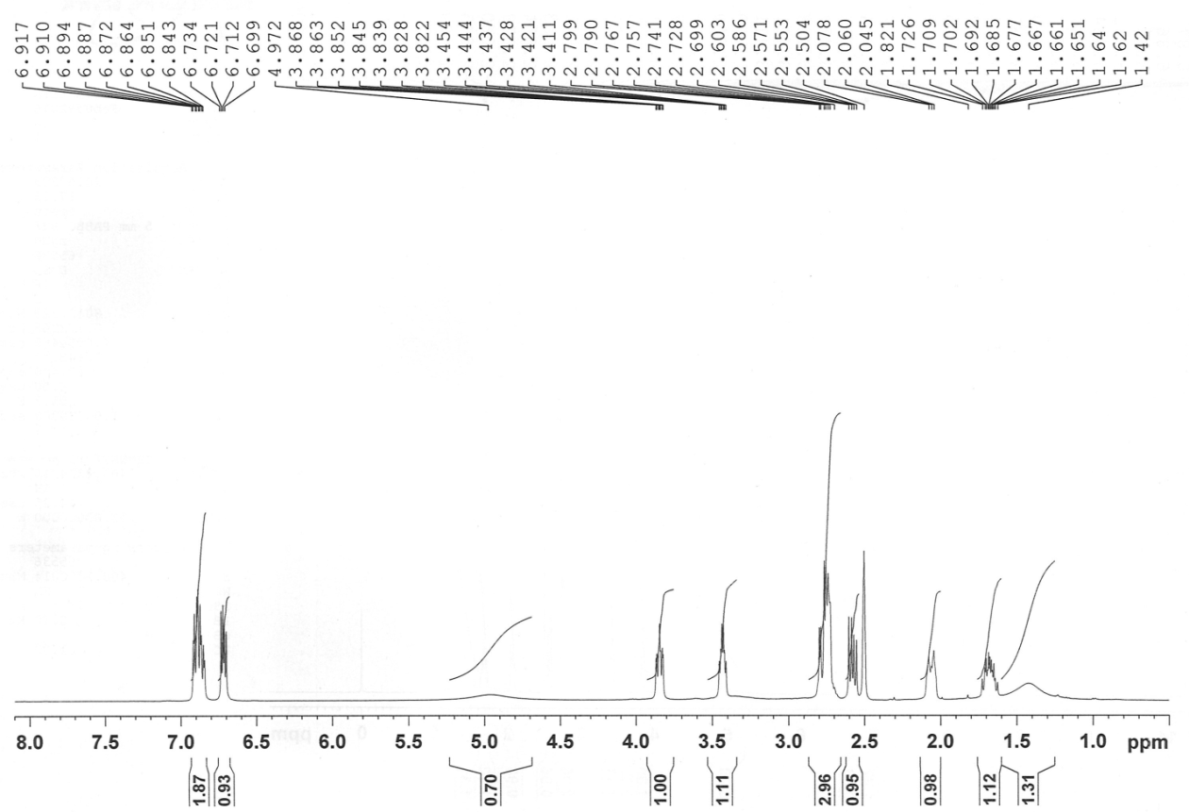


**Figure S 15:** 1H NMR Spectrum of compound 4[2]


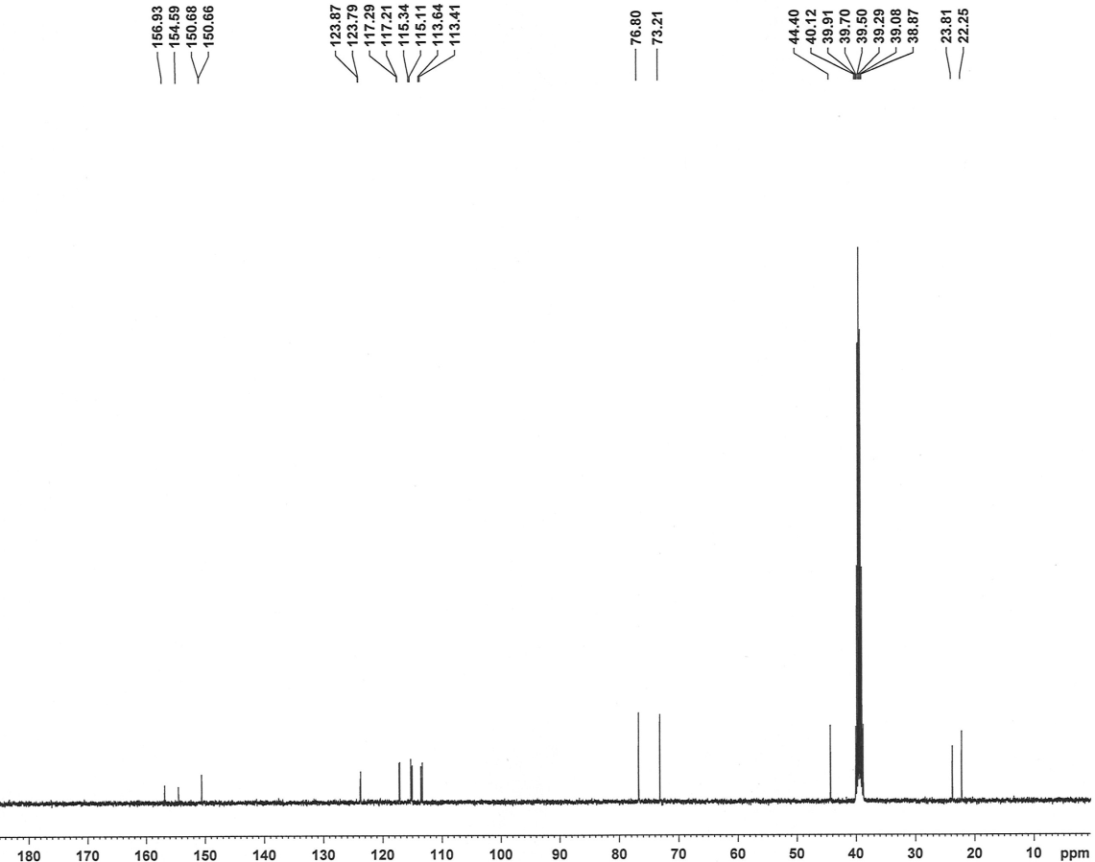


**Figure S 16:** 13C NMR Spectrum of compound 4[2]


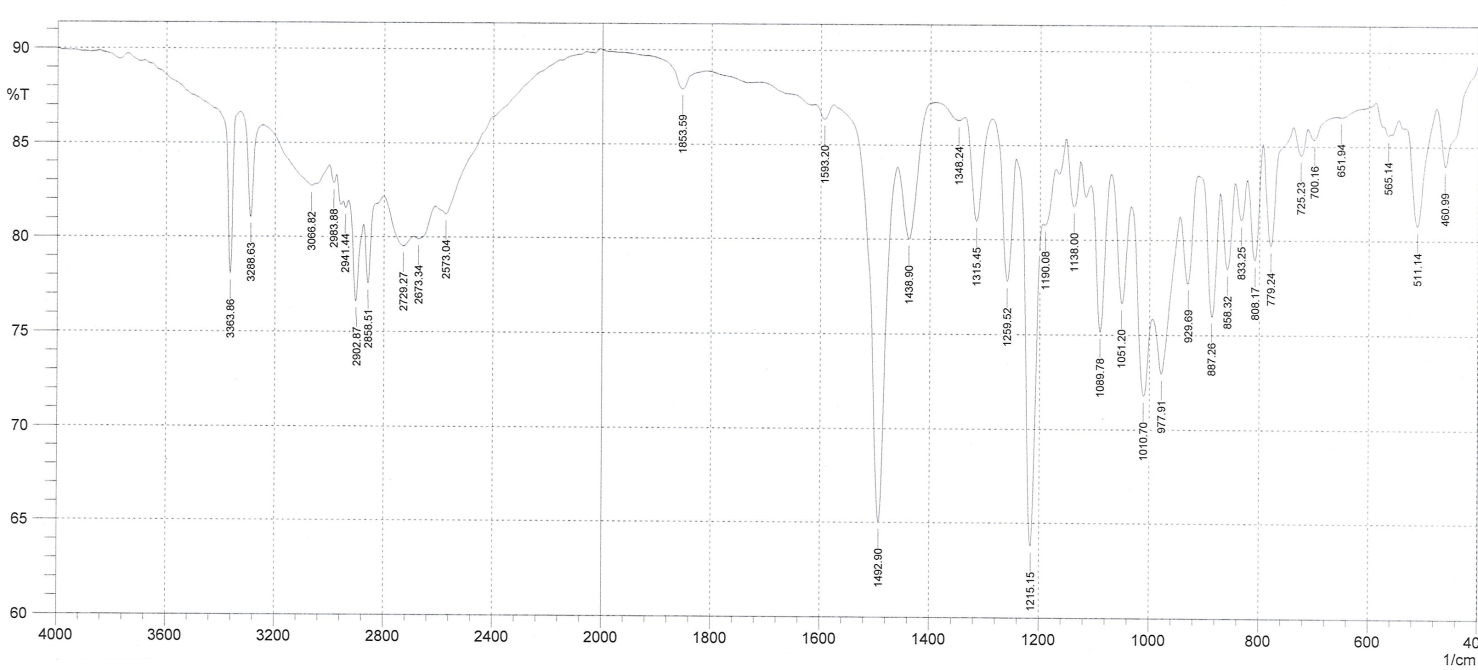


**Figure S 17:** FT-IR Spectrum of compound 4


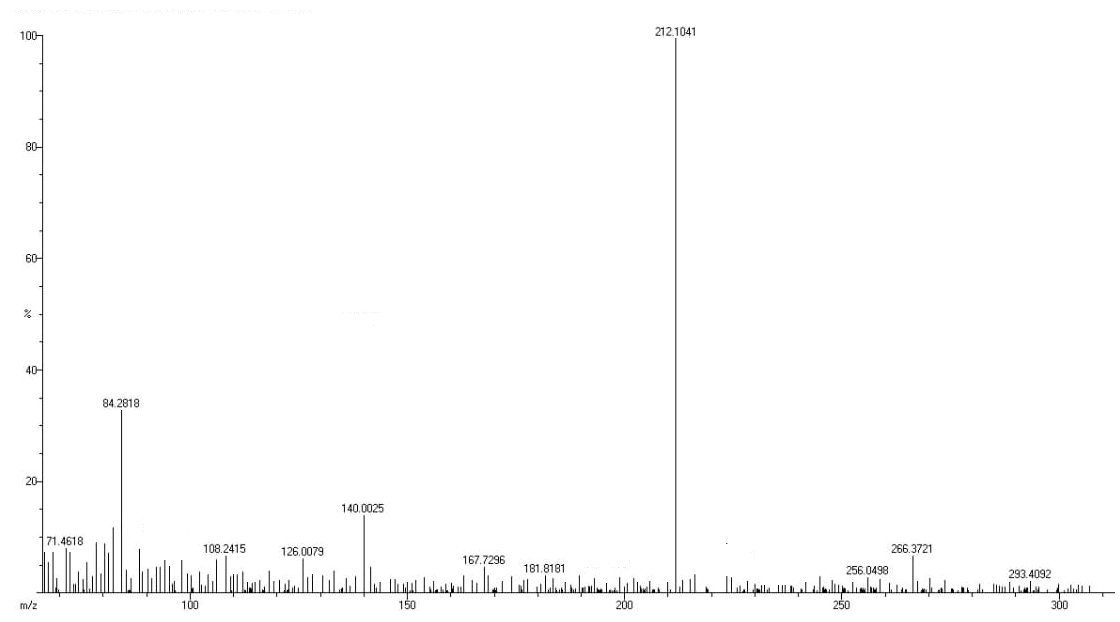


**Figure S 18:** HRMS Spectrum of compound 4


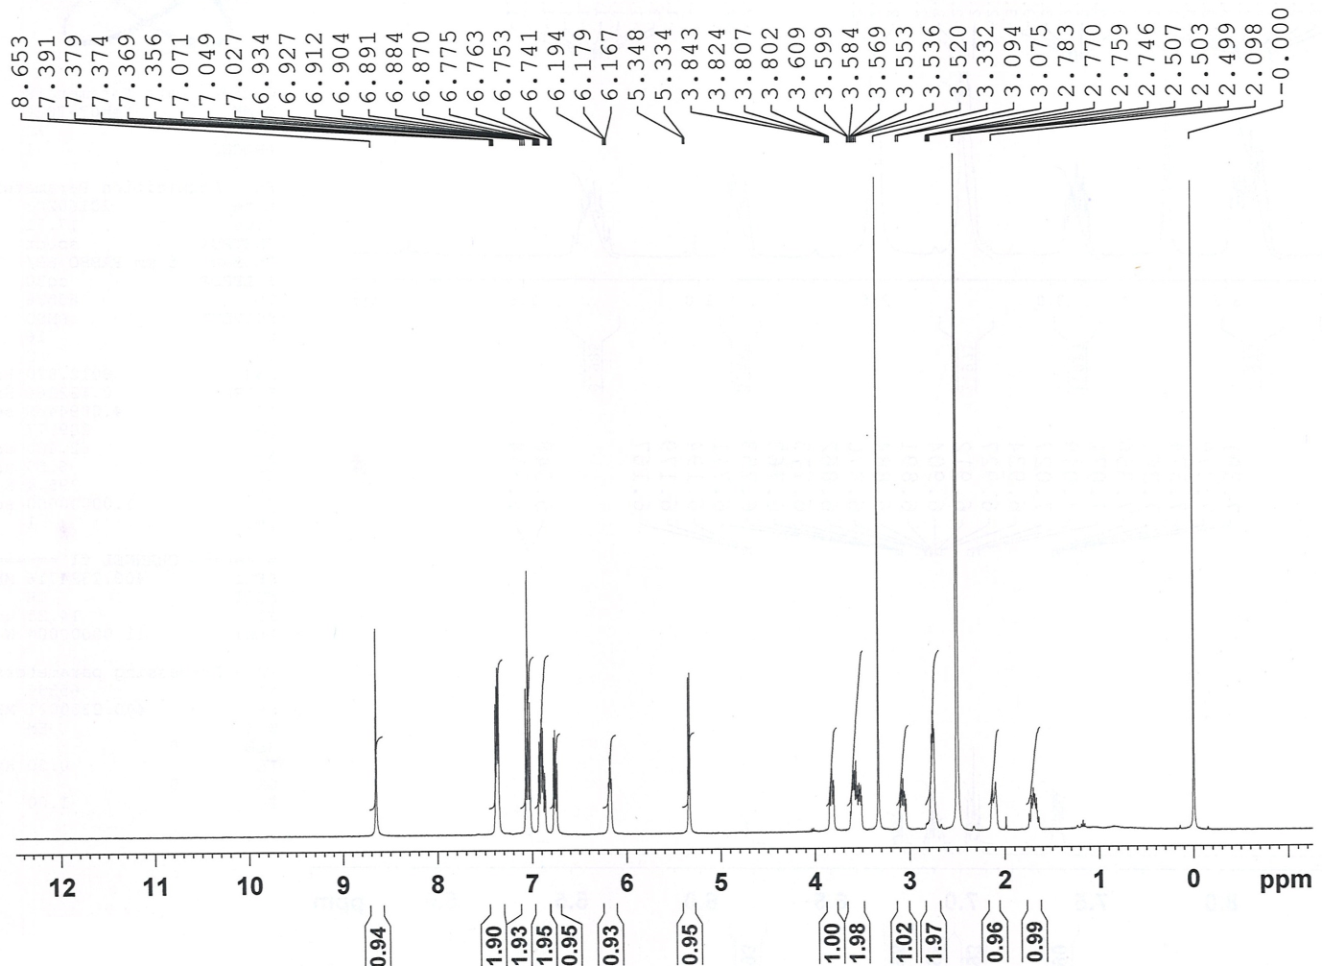


**Figure S 19:** 1H NMR Spectrum of compound 1a


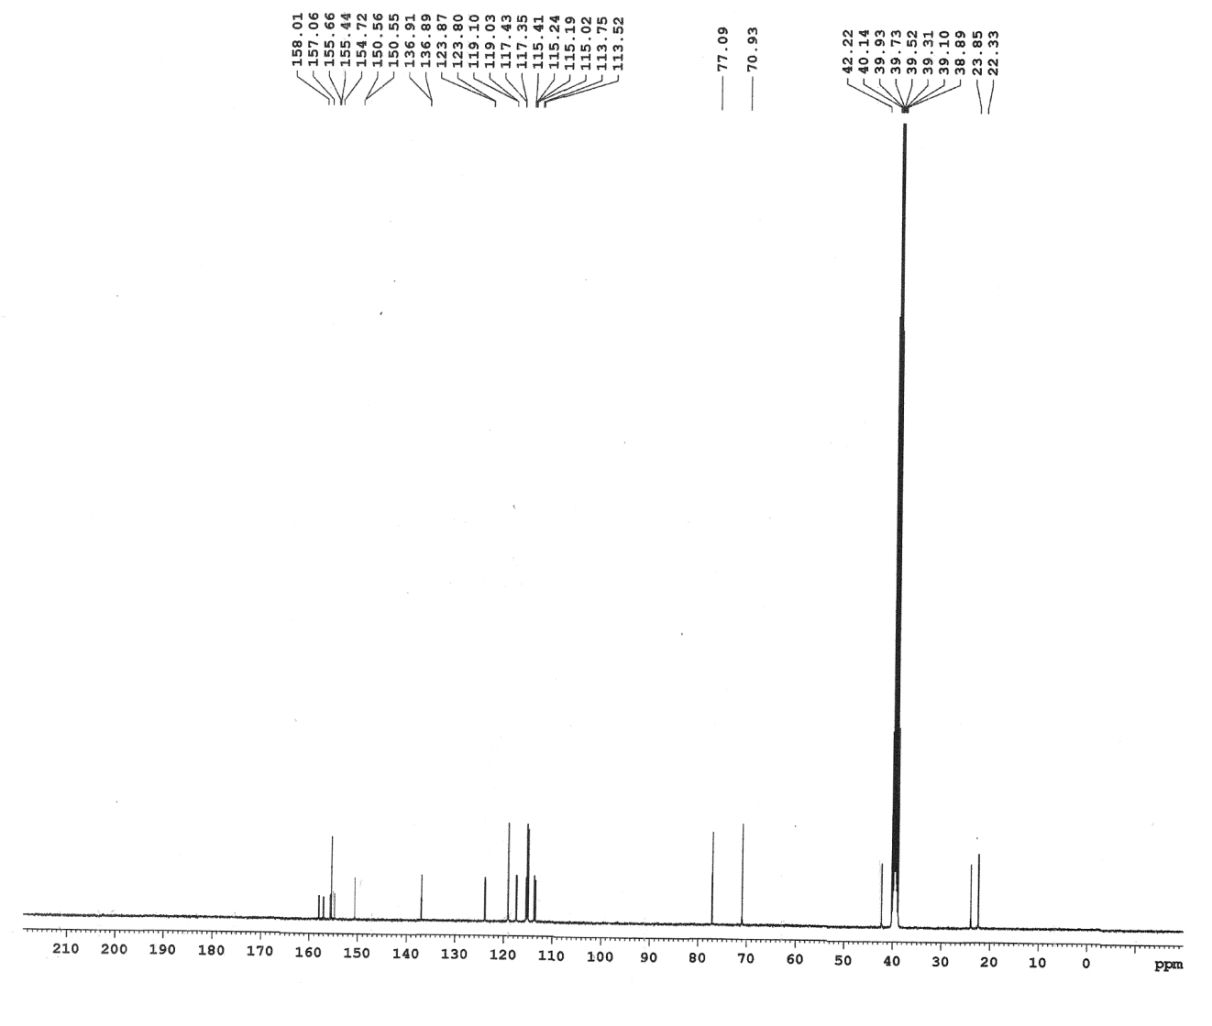


**Figure S 20:** 13C NMR Spectrum of compound 1a


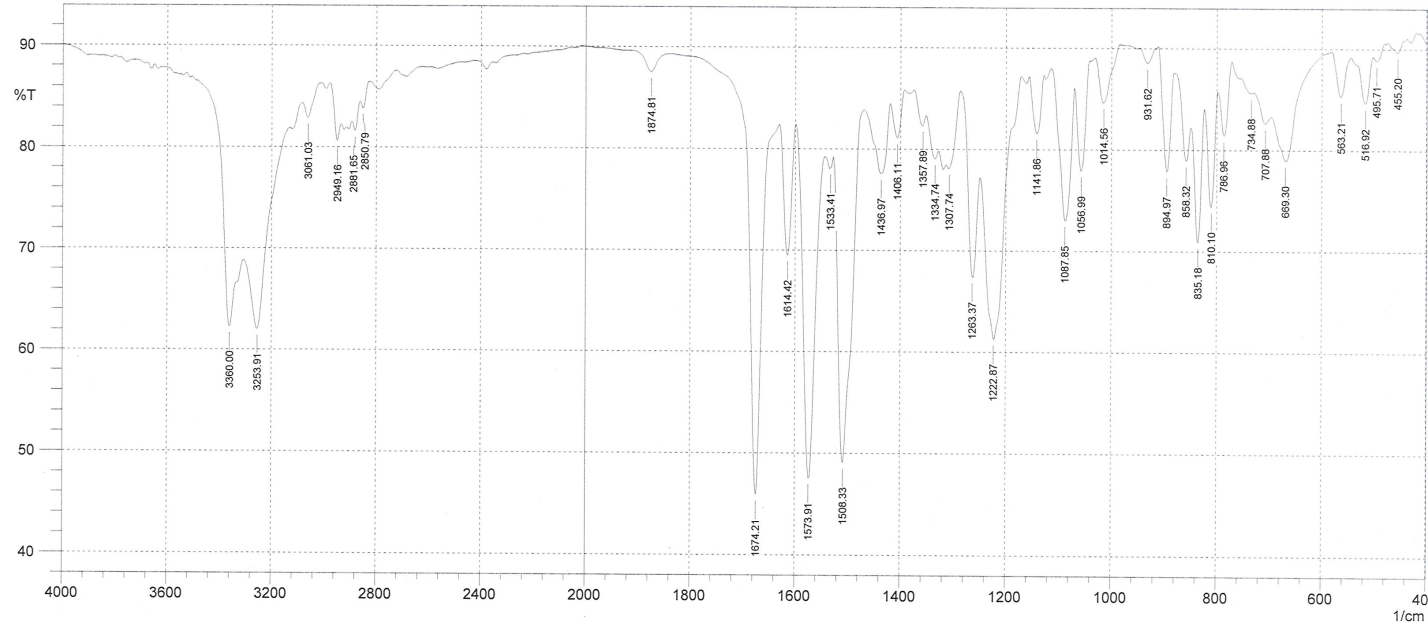


**Figure S 21:** FT-IR Spectrum of compound 1a


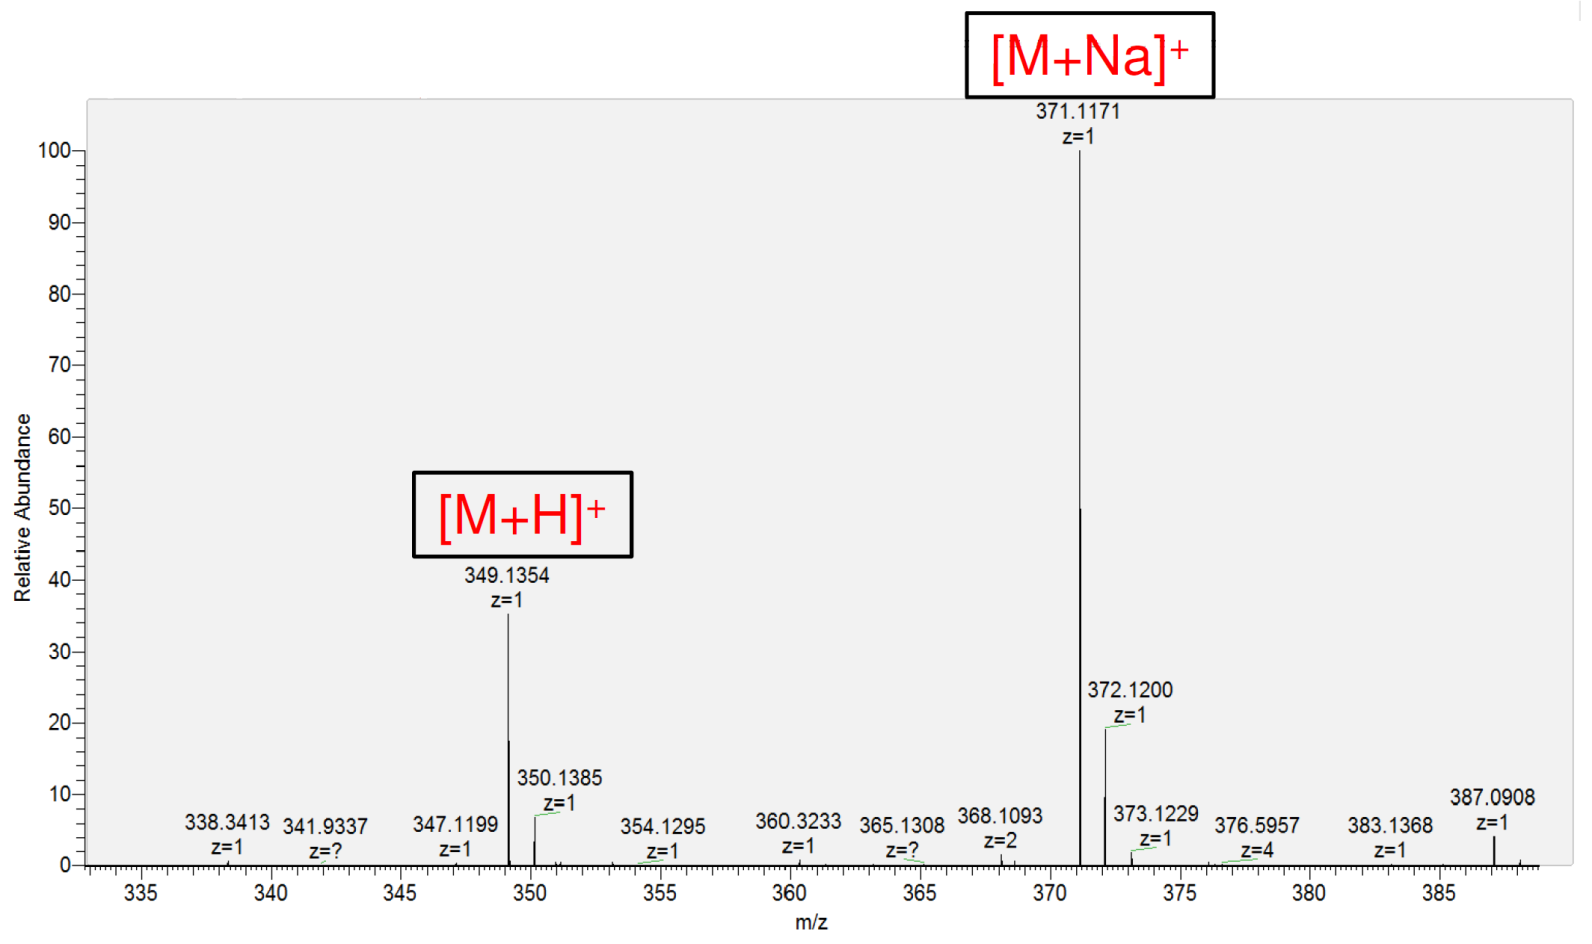


**Figure S 22:** HRMS Spectrum of compound 1a


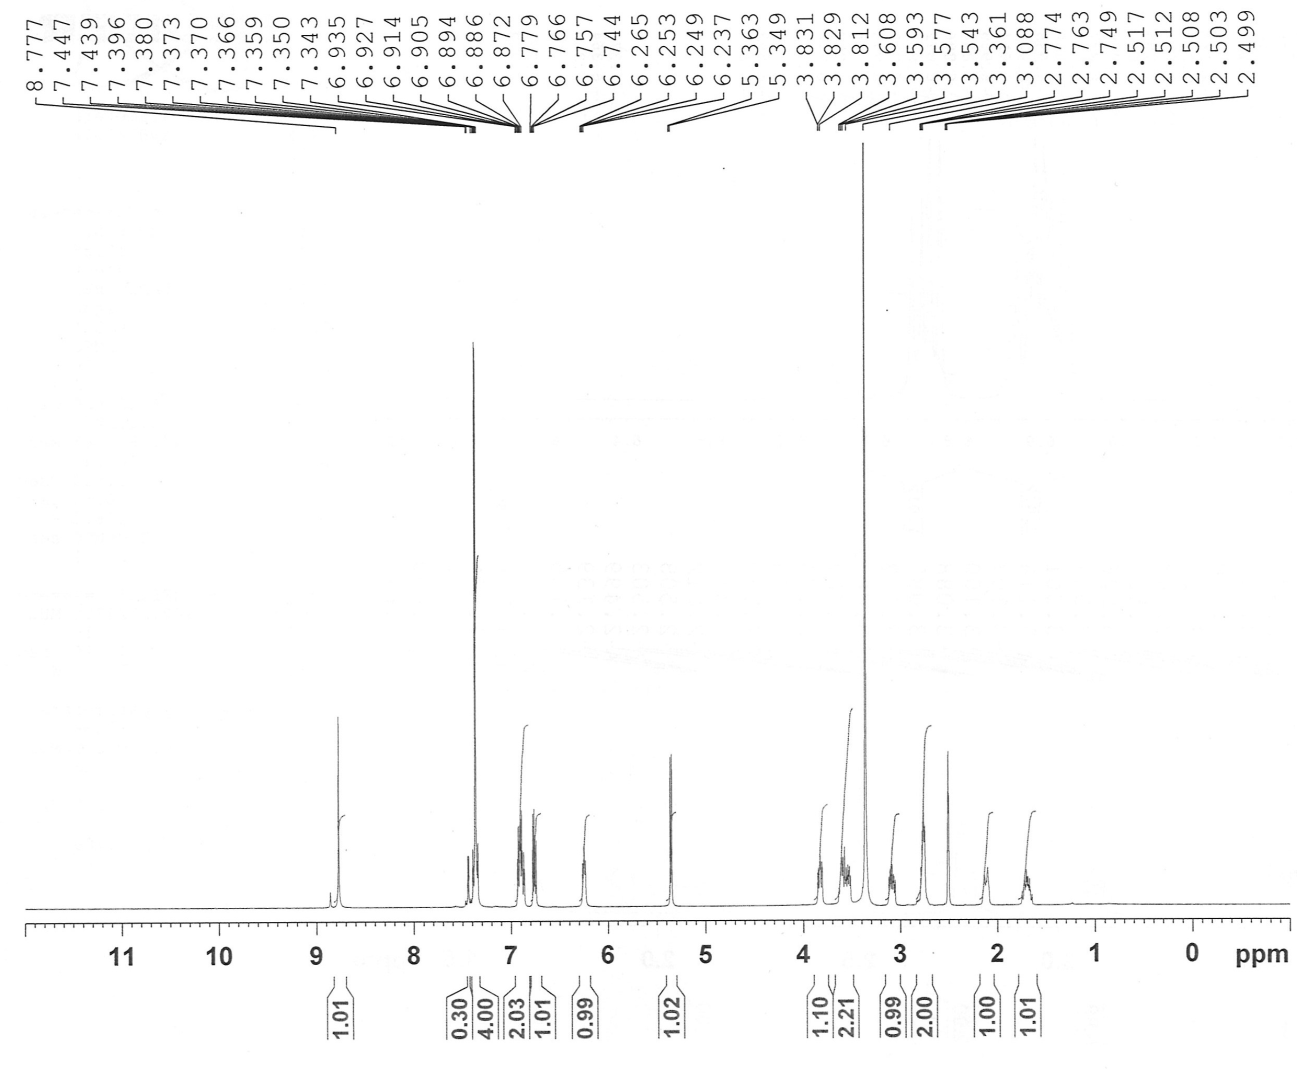


**Figure S 23:** 1H NMR Spectrum of compound 1b


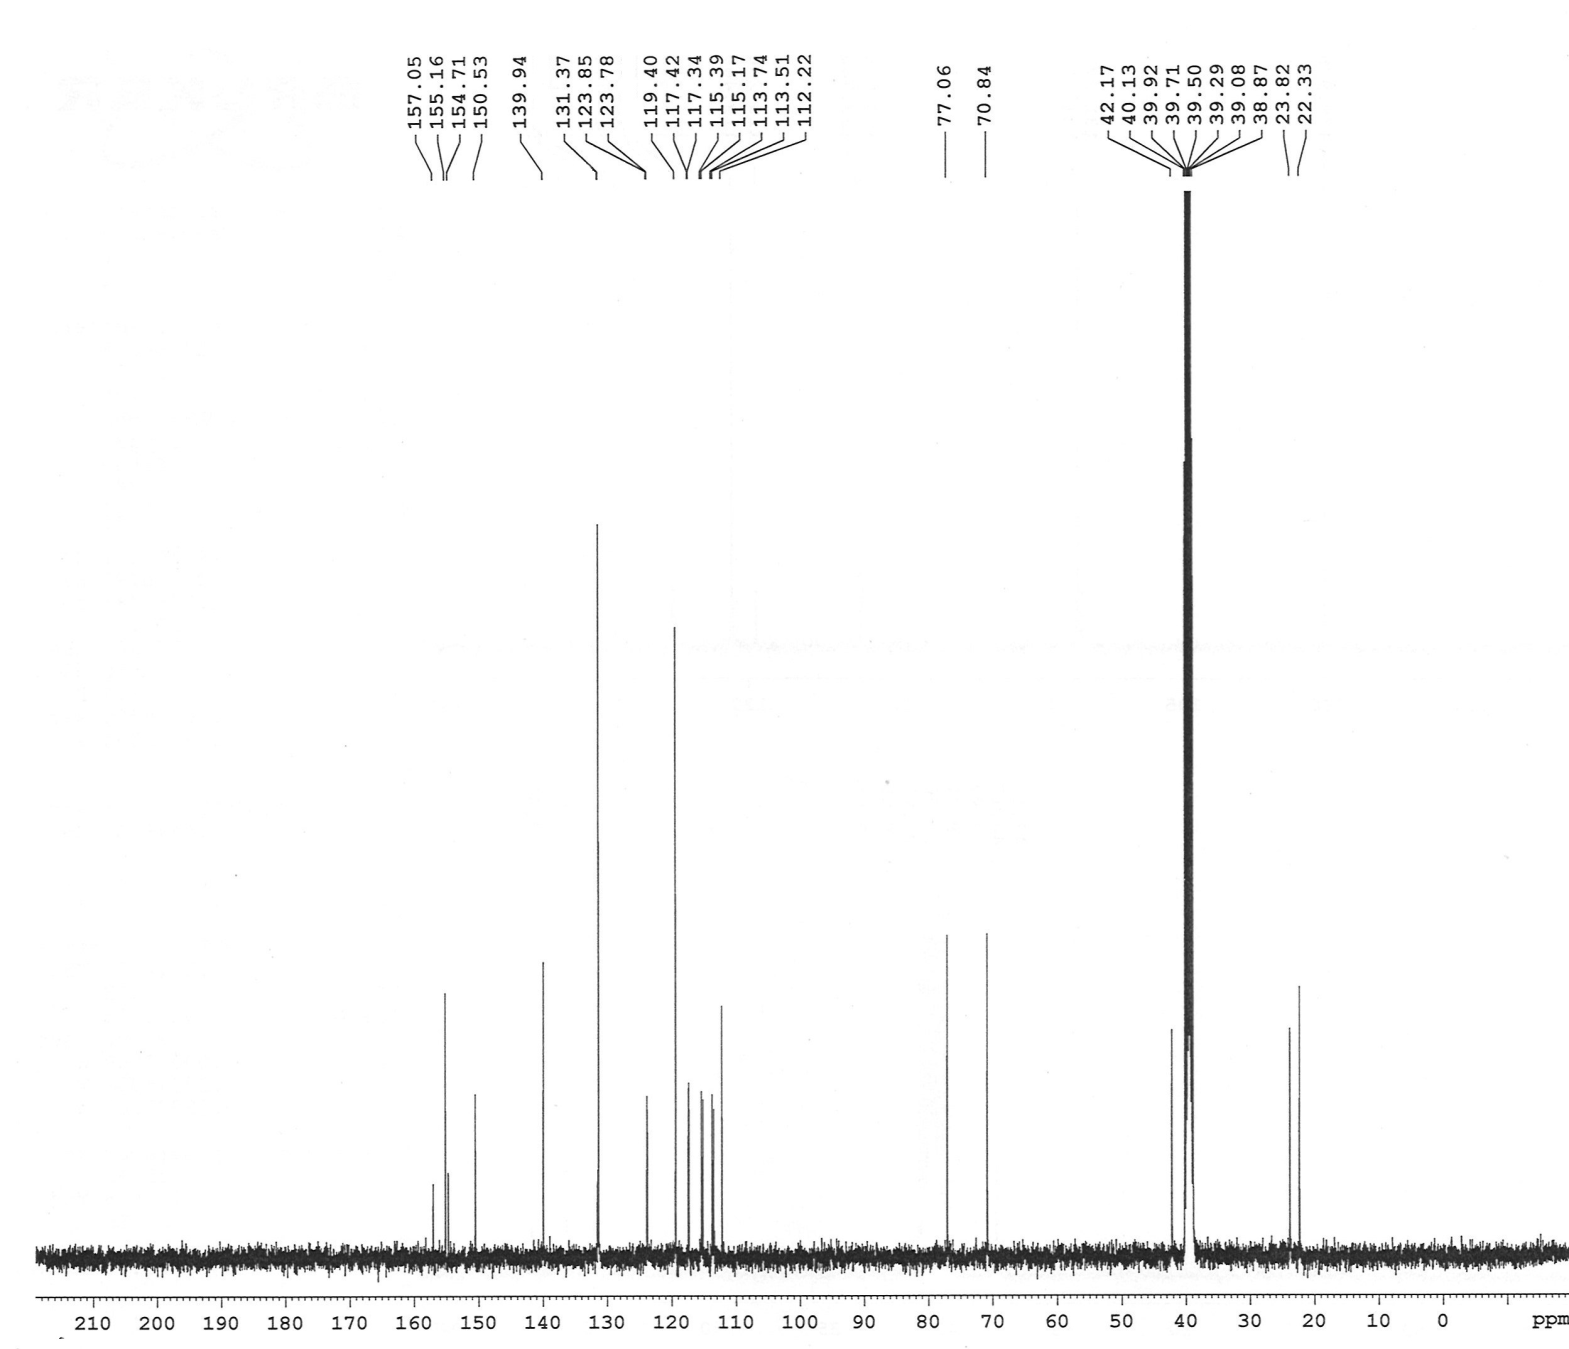


**Figure S 24:** 13C NMR Spectrum of compound 1b


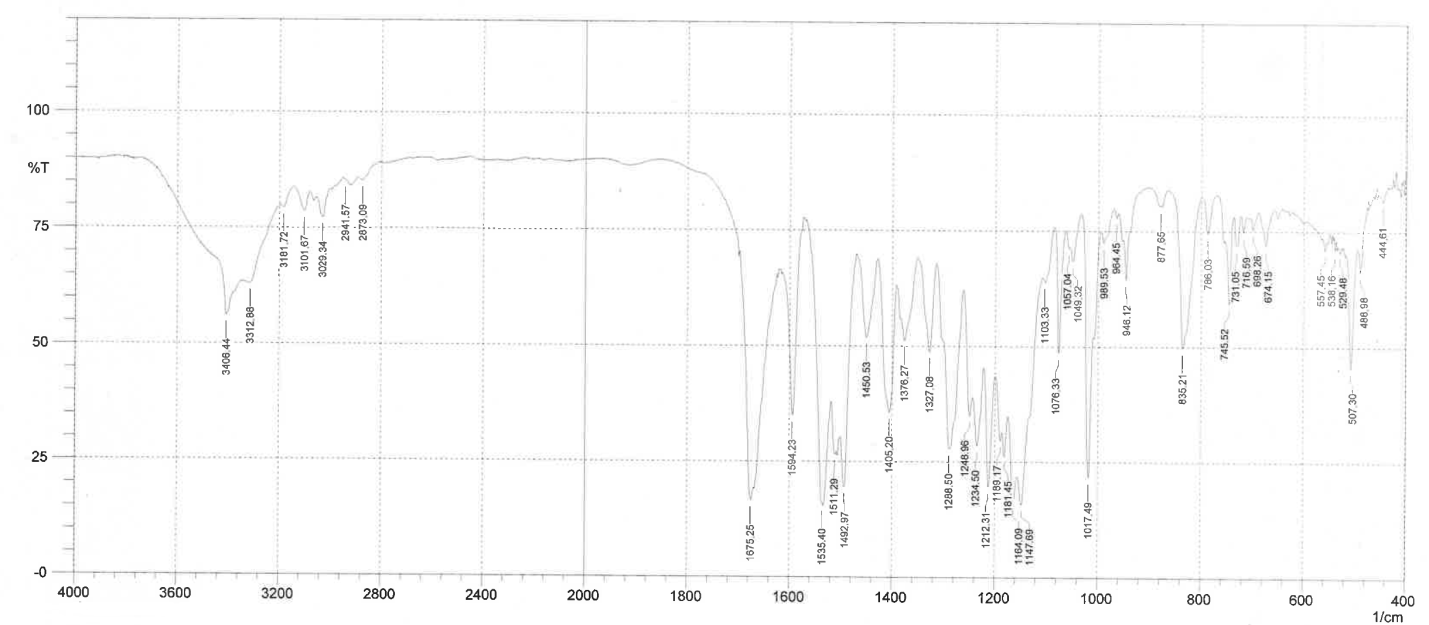


**Figure S 25:** FT-IR Spectrum of compound 1b


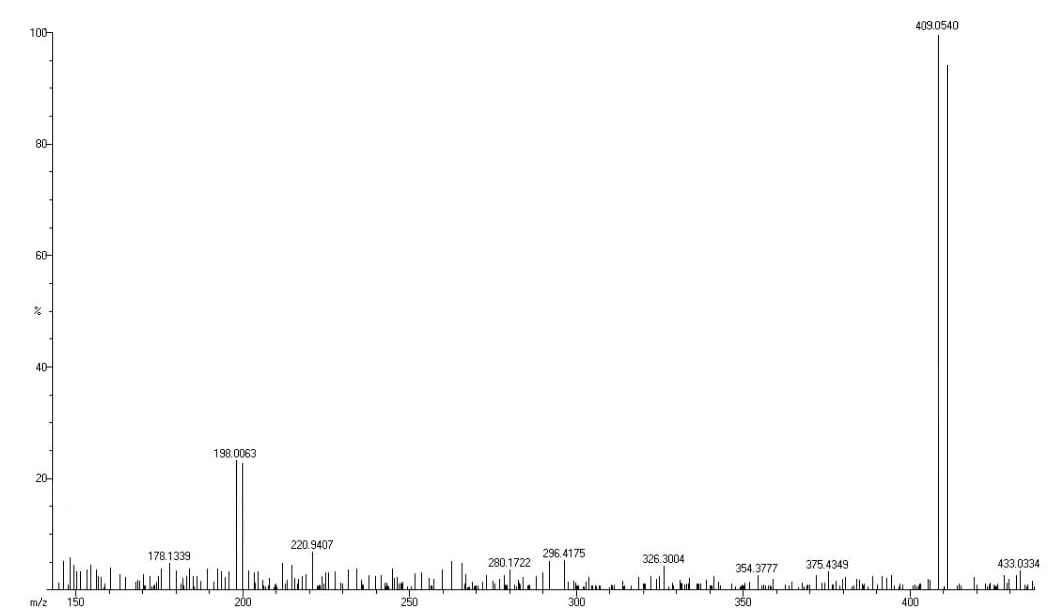


**Figure S 26:** HRMS Spectrum of compound 1b


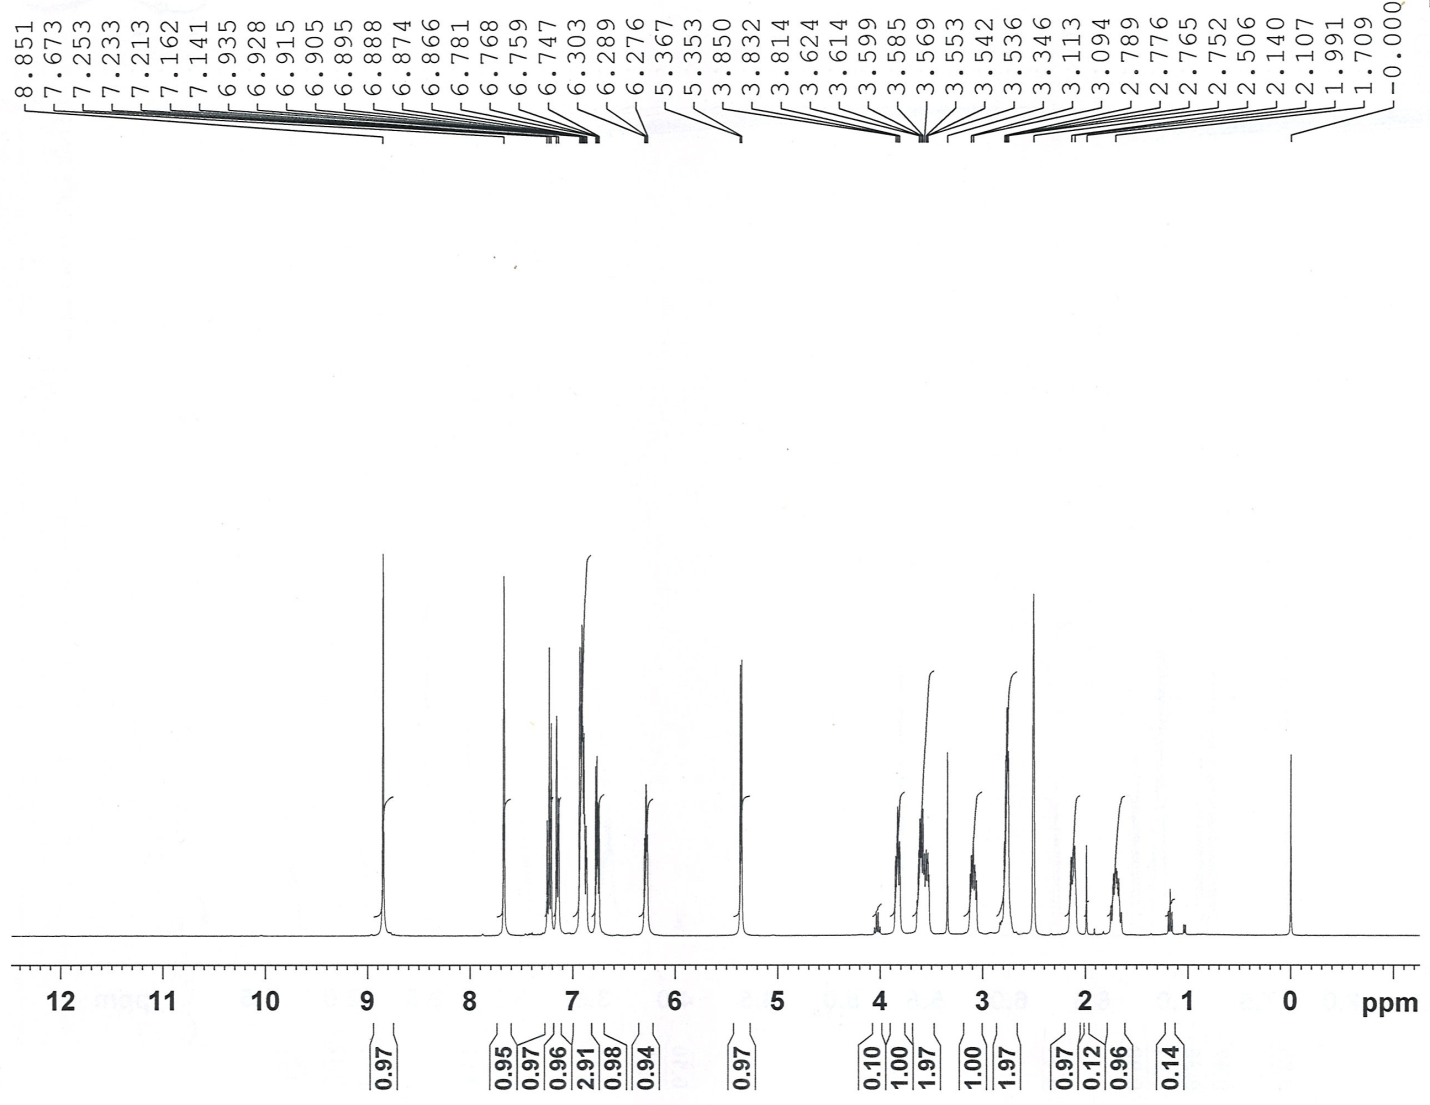


**Figure S 27:** 1H NMR Spectrum of compound 1c


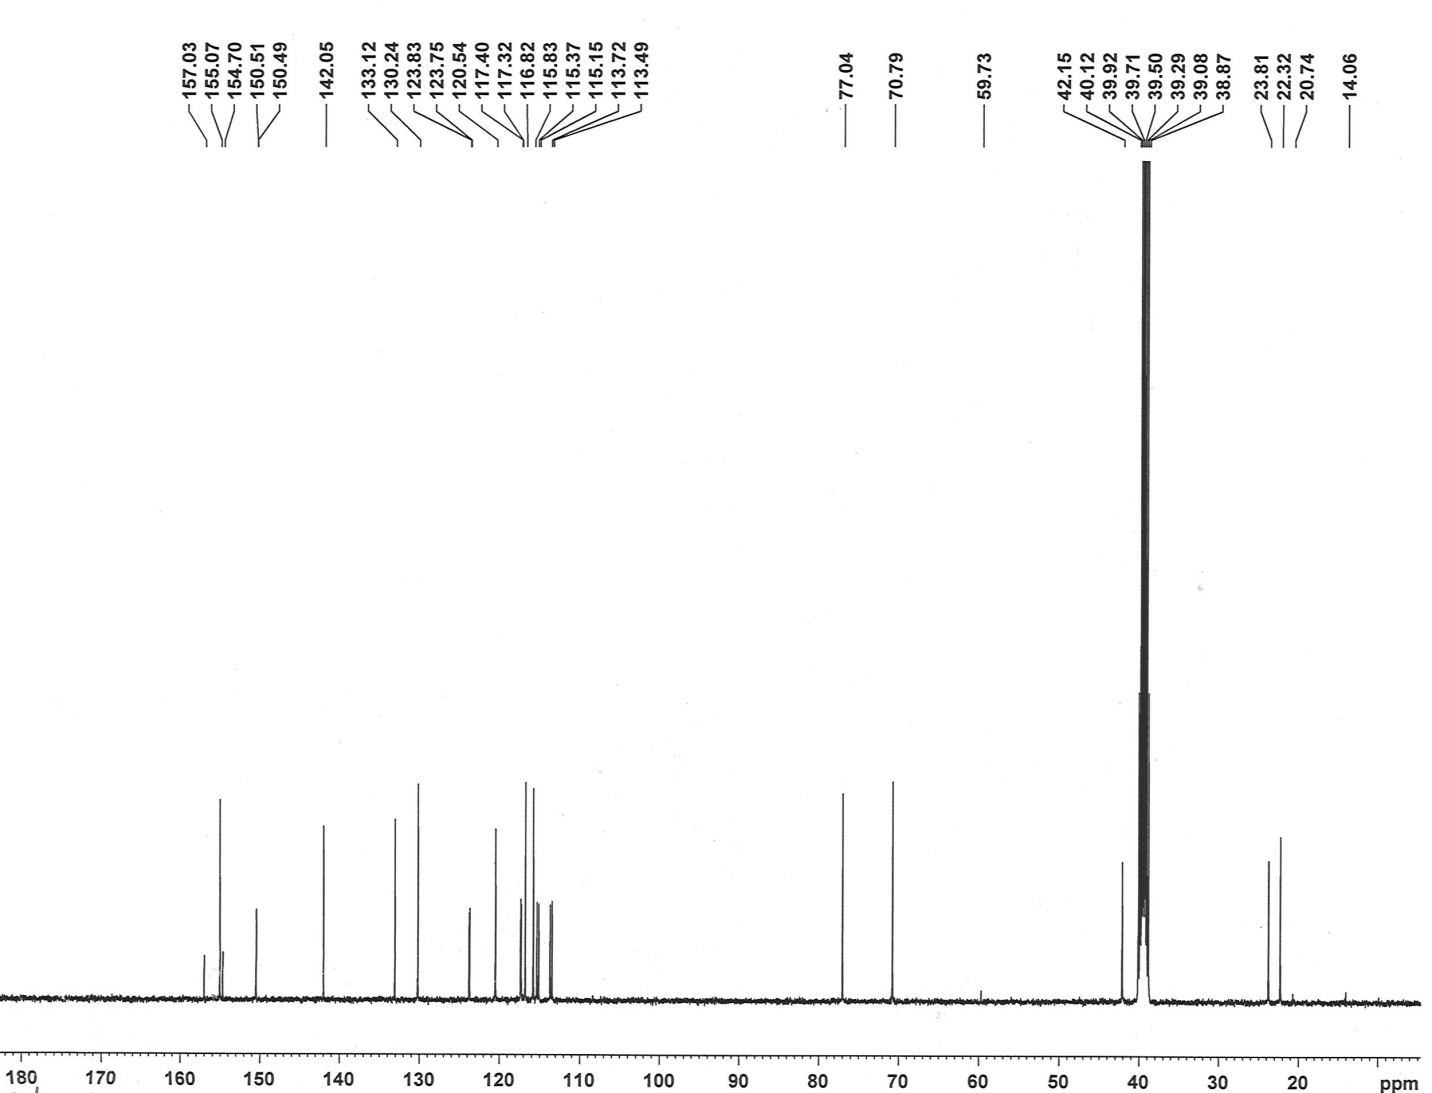


**Figure S 28:** 13C NMR Spectrum of compound 1c


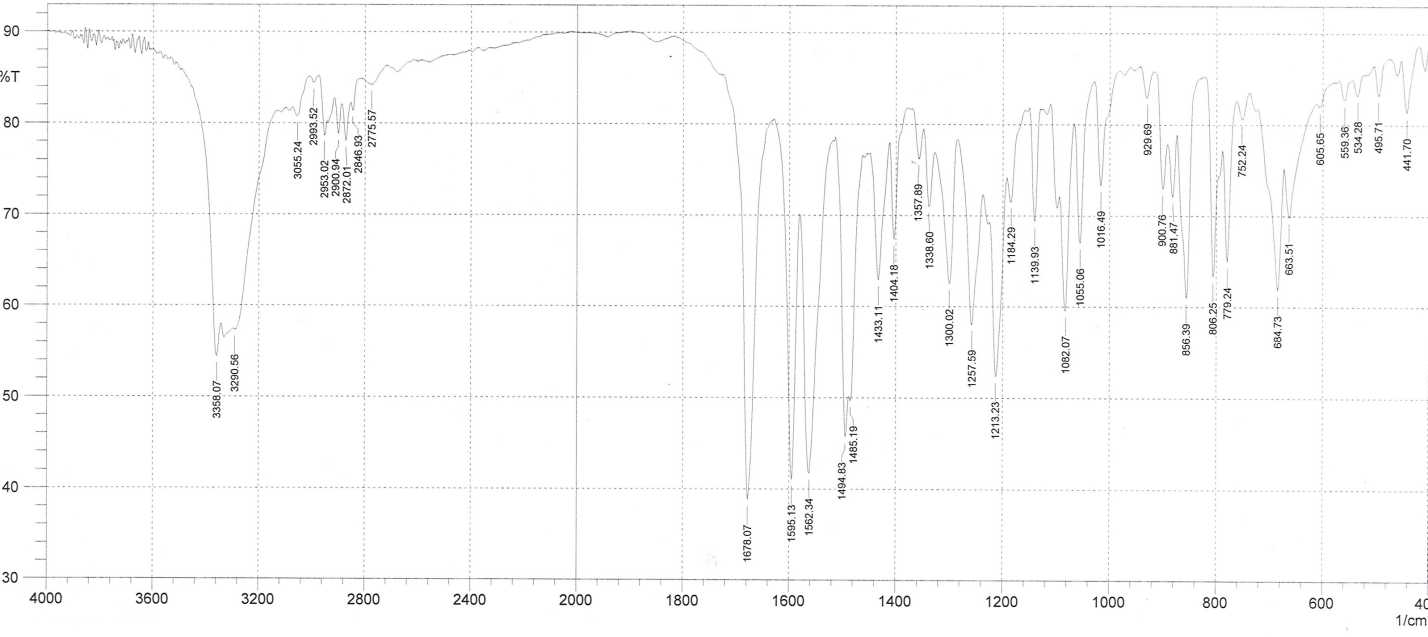


**Figure S 29:** FT-IR Spectrum of compound 1c


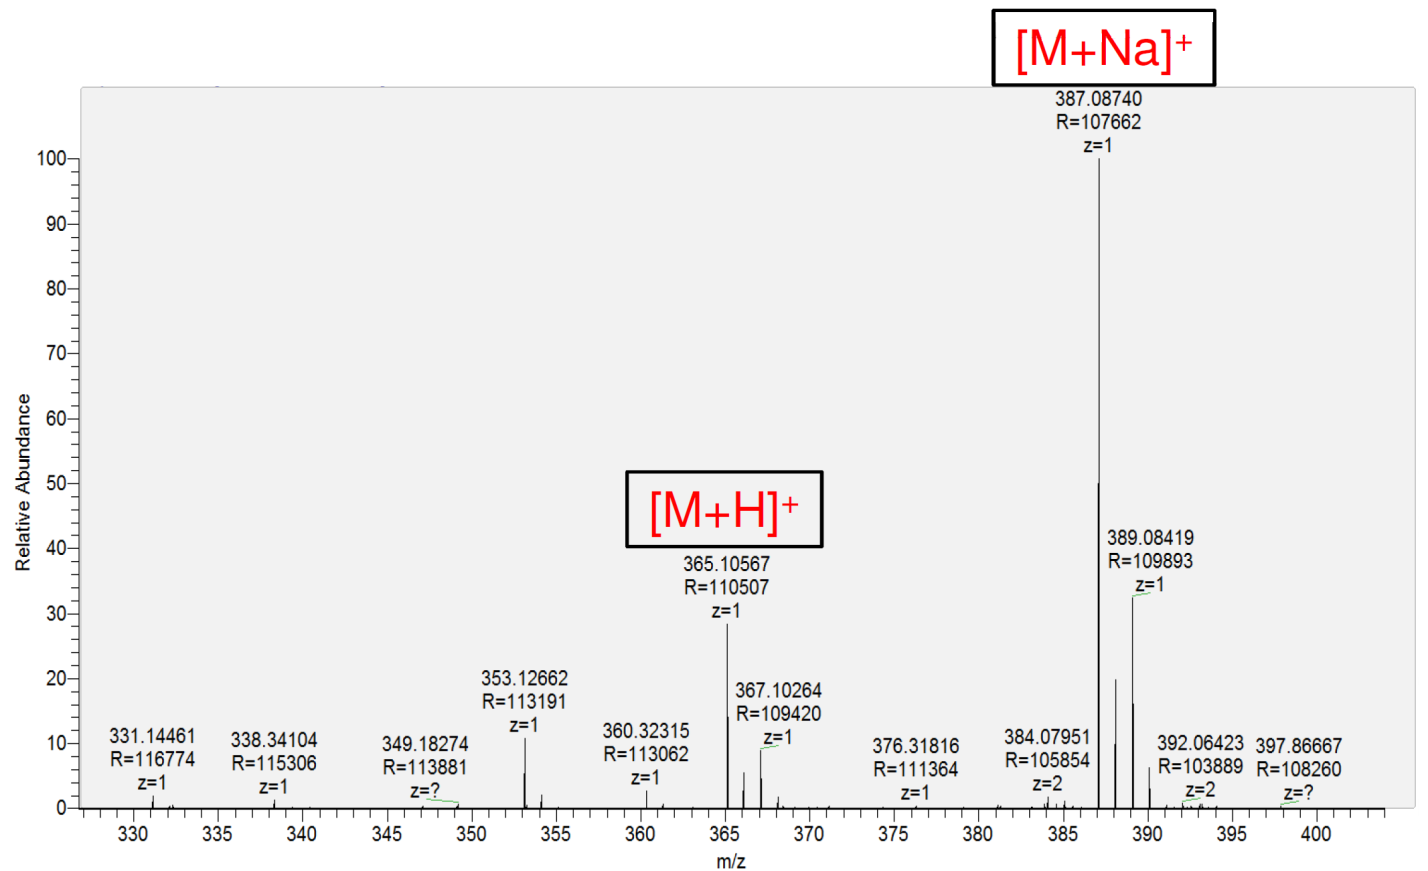


**Figure S 30:** HRMS Spectrum of compound 1c


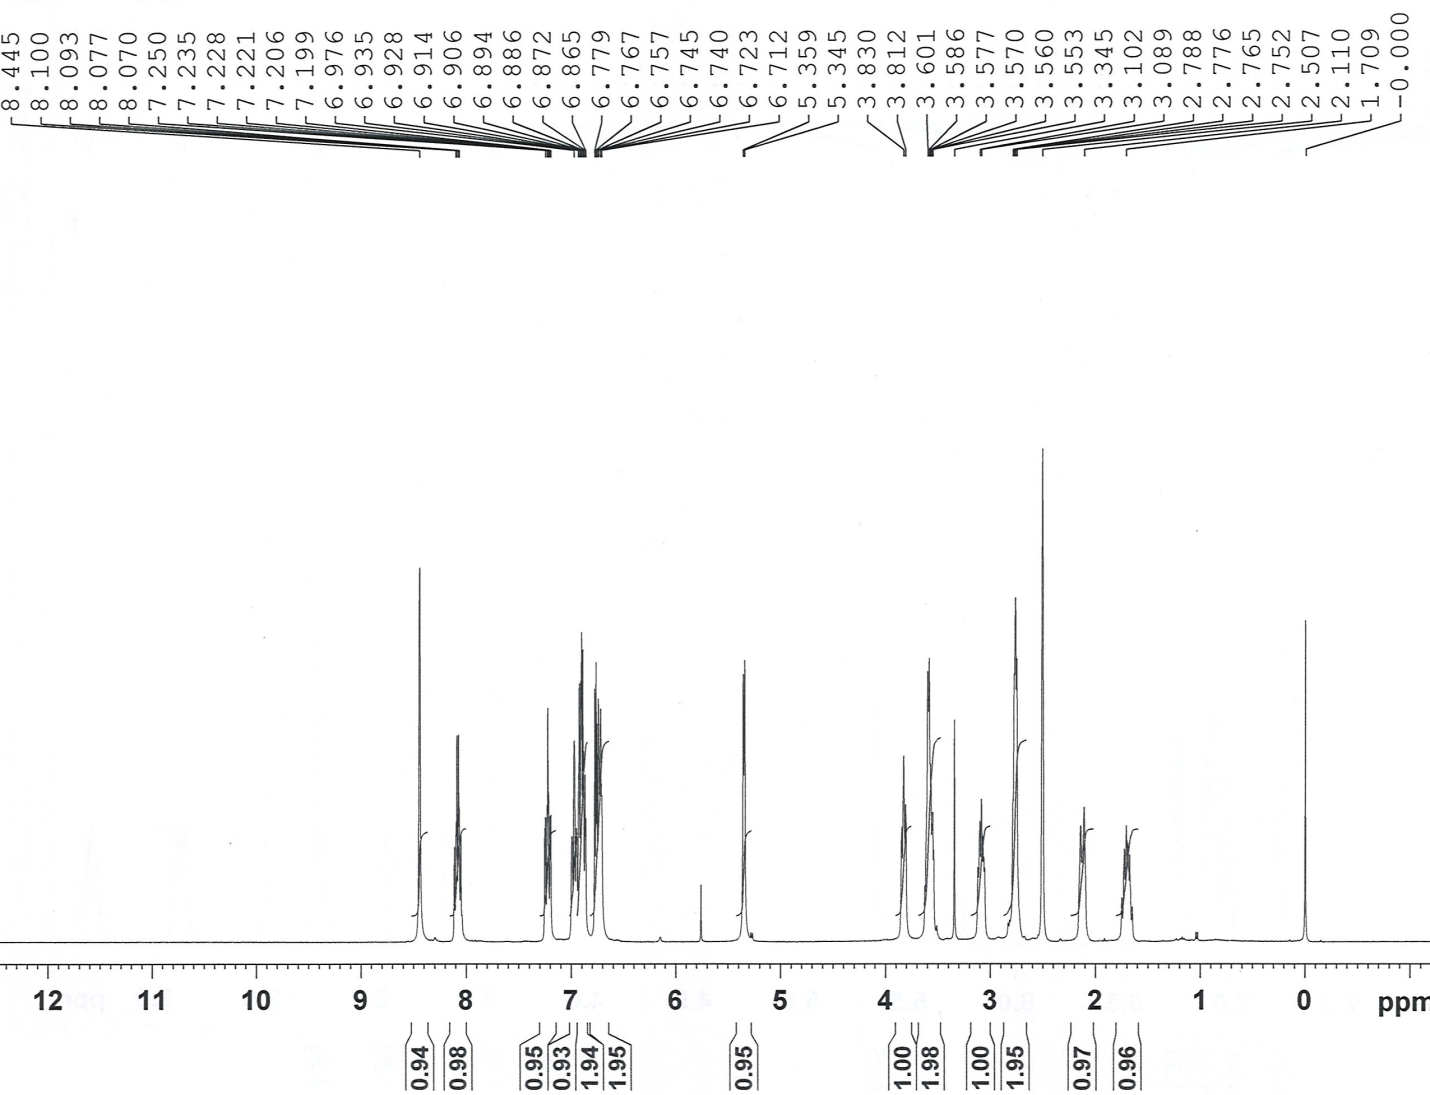


**Figure S 31:** 1H NMR Spectrum of compound 1d


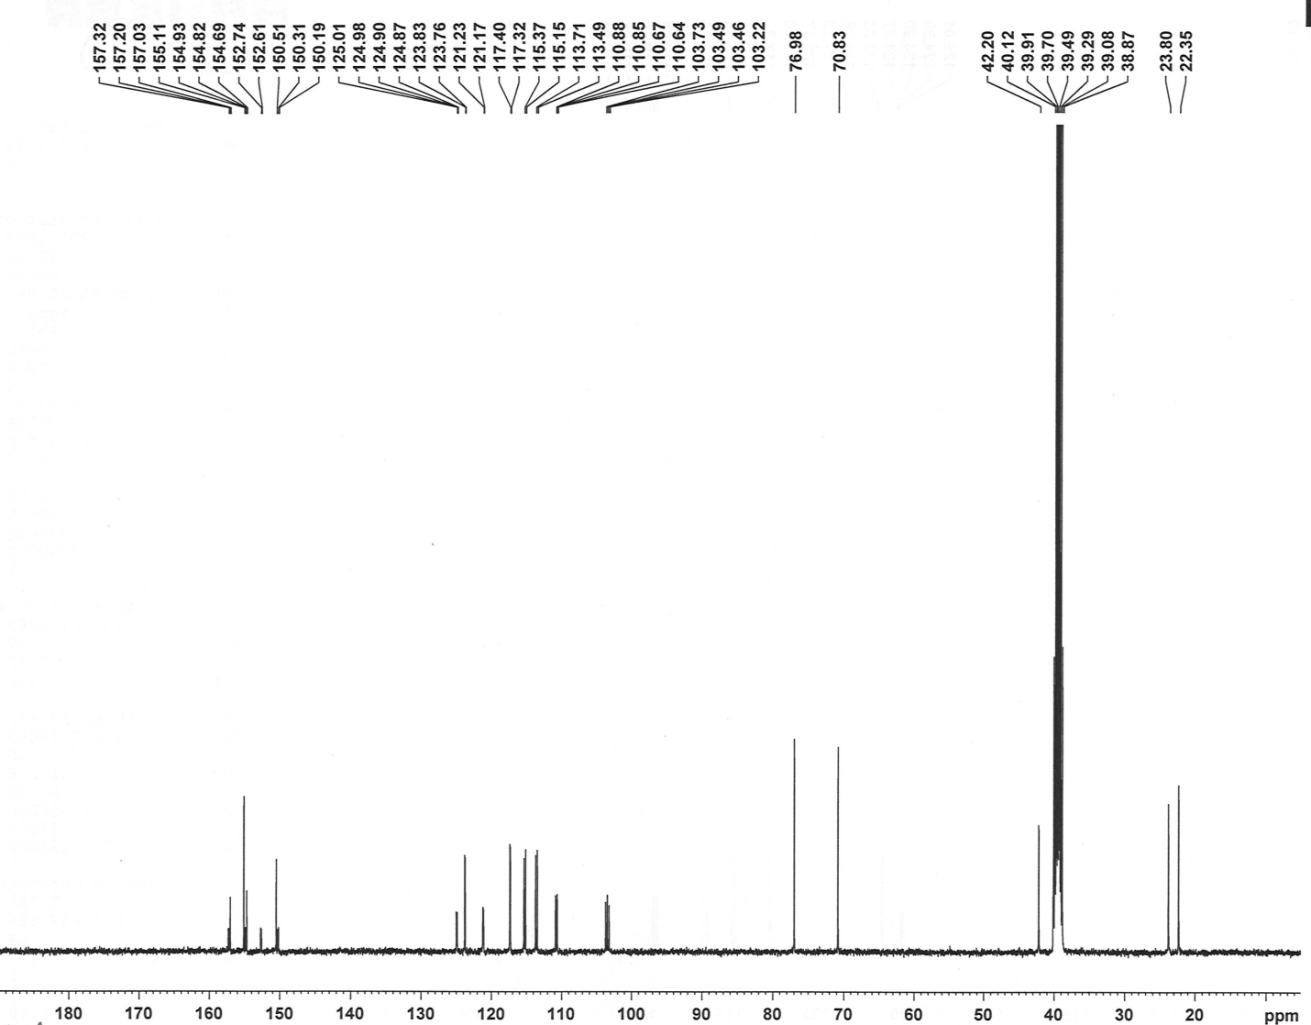


**Figure S 32:** 13C NMR Spectrum of compound 1d


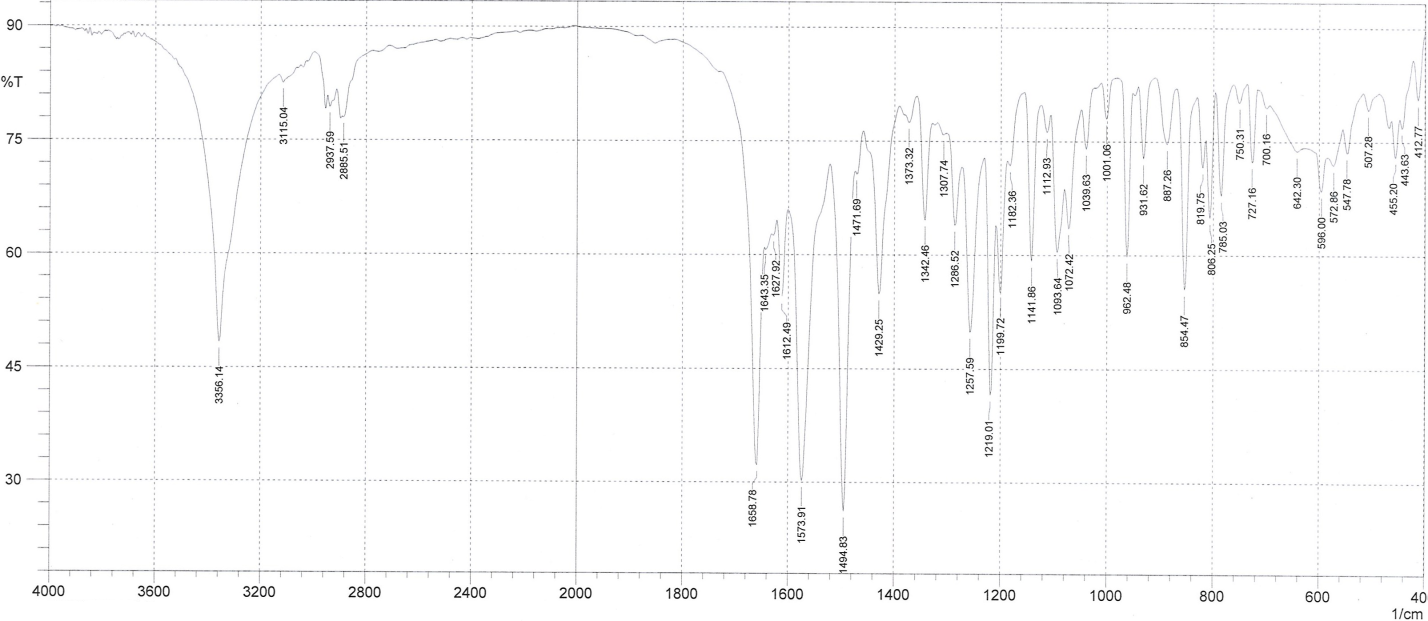


**Figure S 33:** FT-IR Spectrum of compound 1d


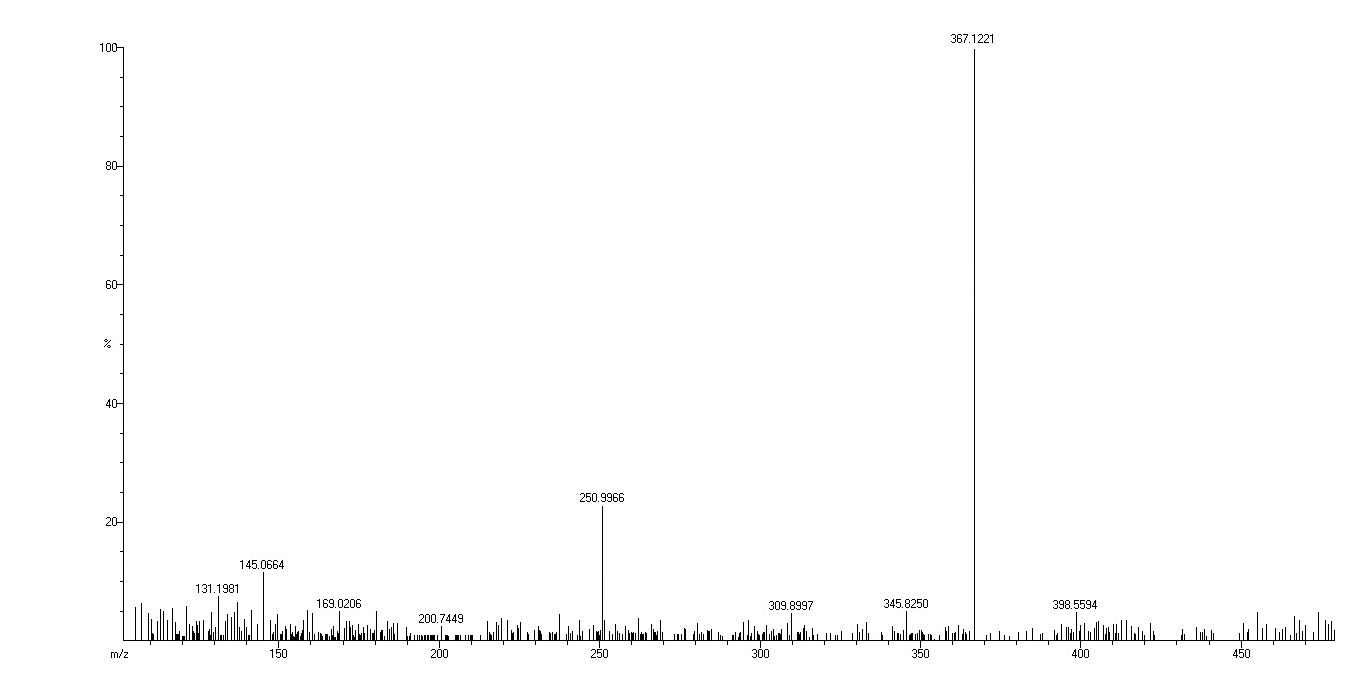


**Figure S 34:** Mass Spectrum of compound 1d


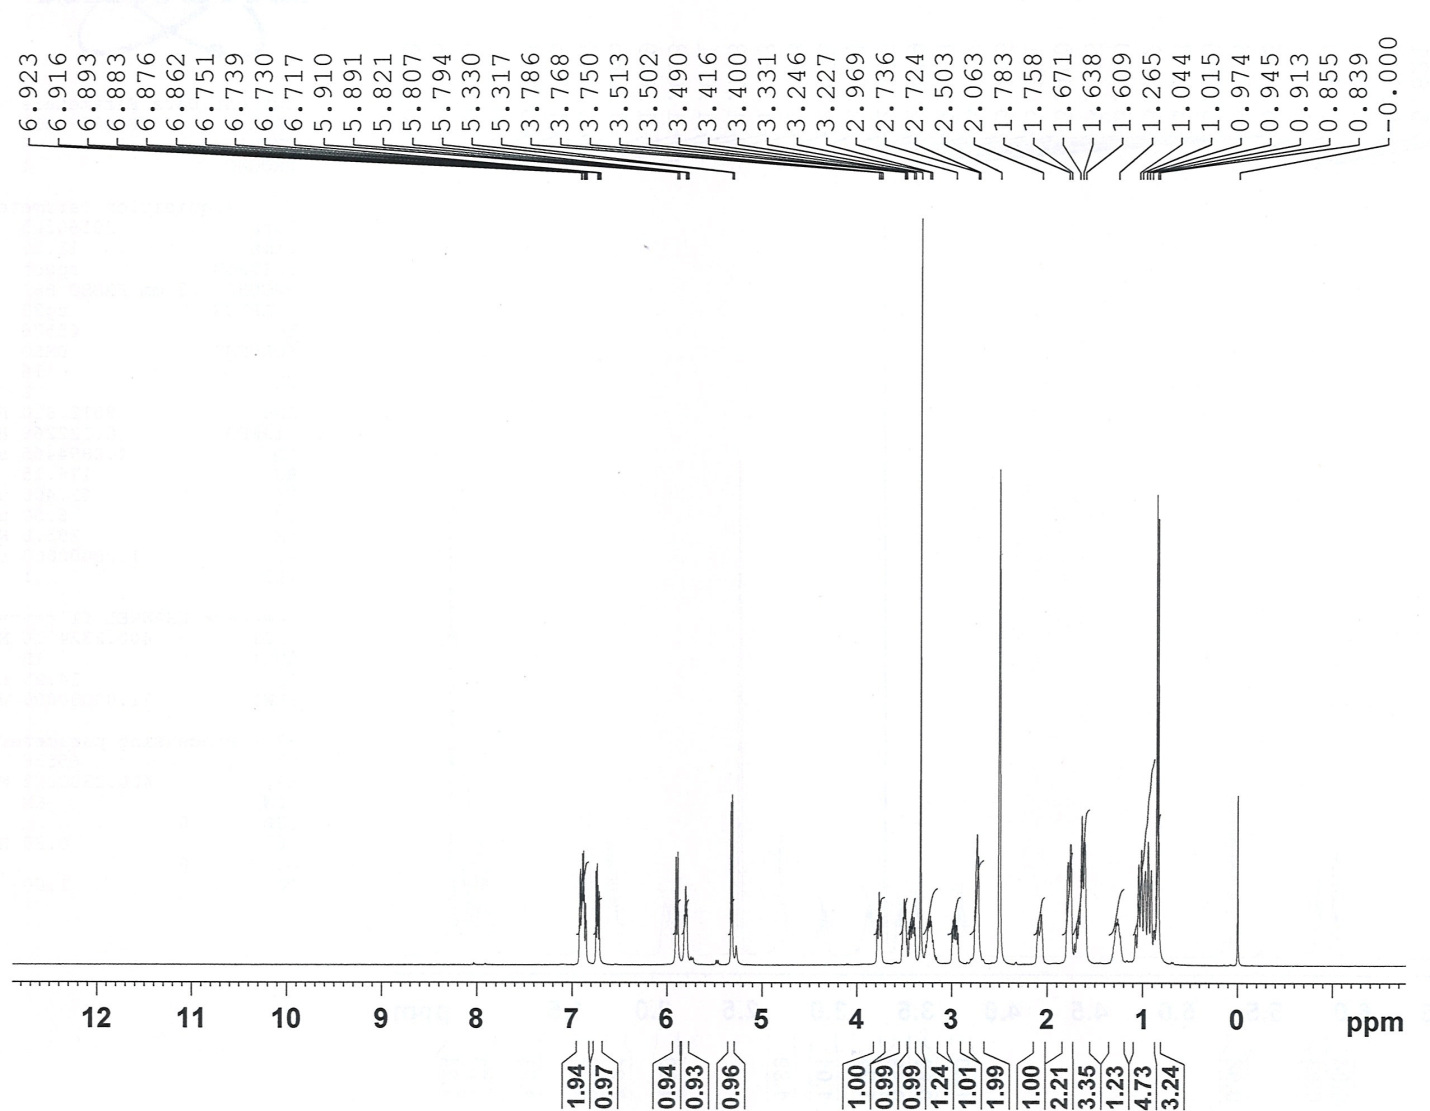


**Figure S 35:** 1H NMR Spectrum of compound 1e


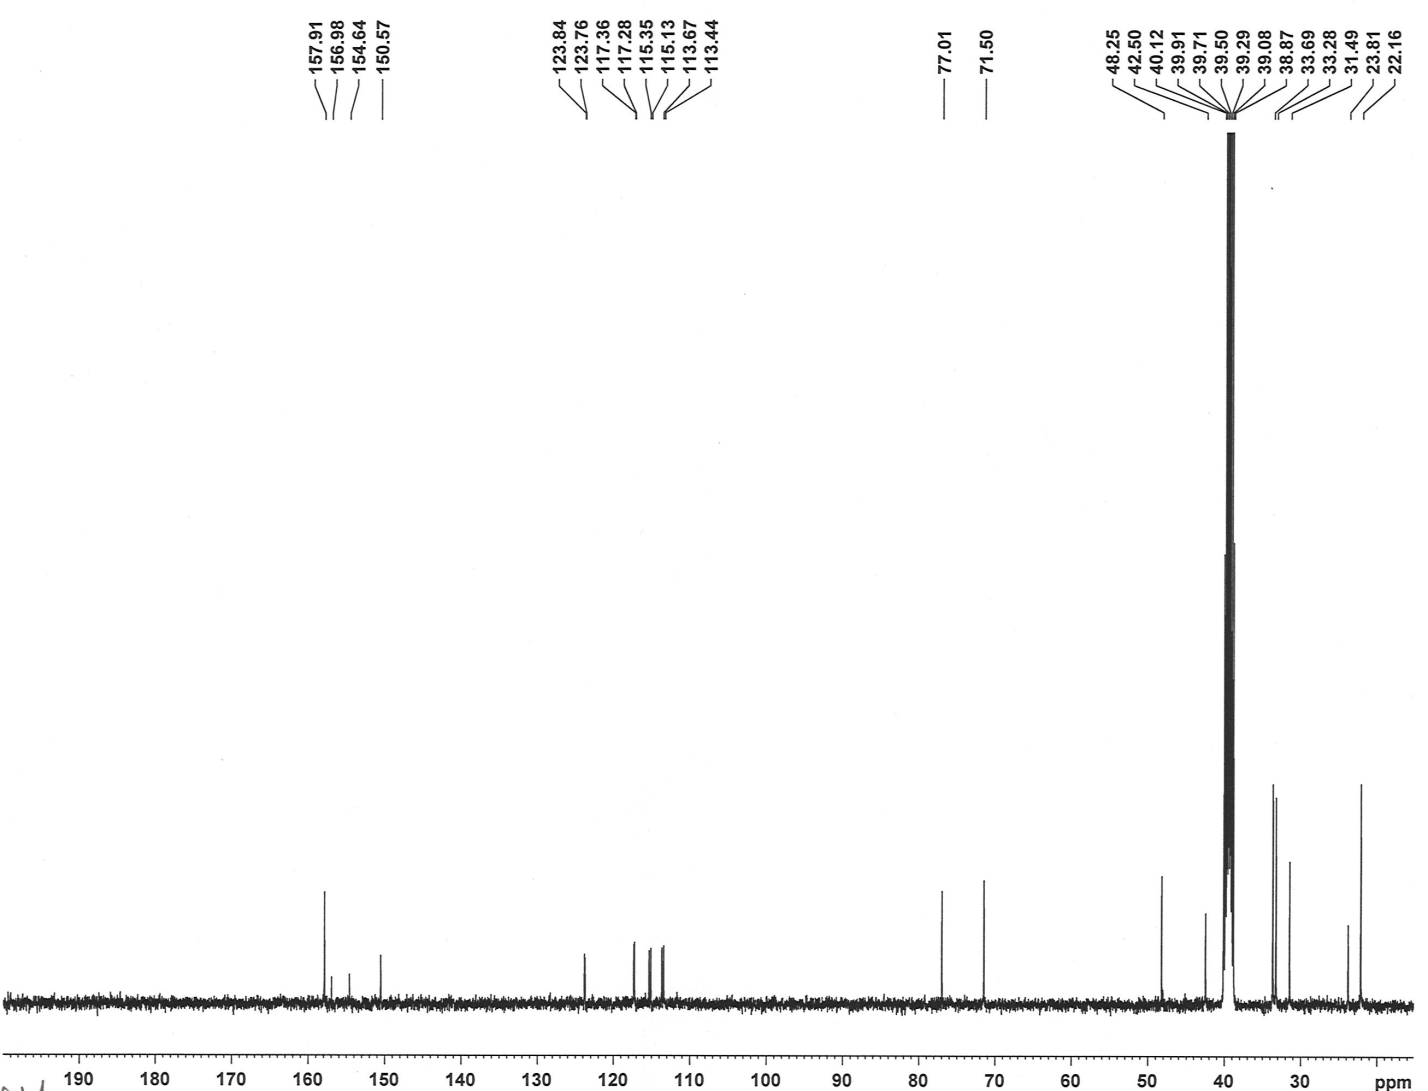


**Figure S 36:** 13C NMR Spectrum of compound 1e


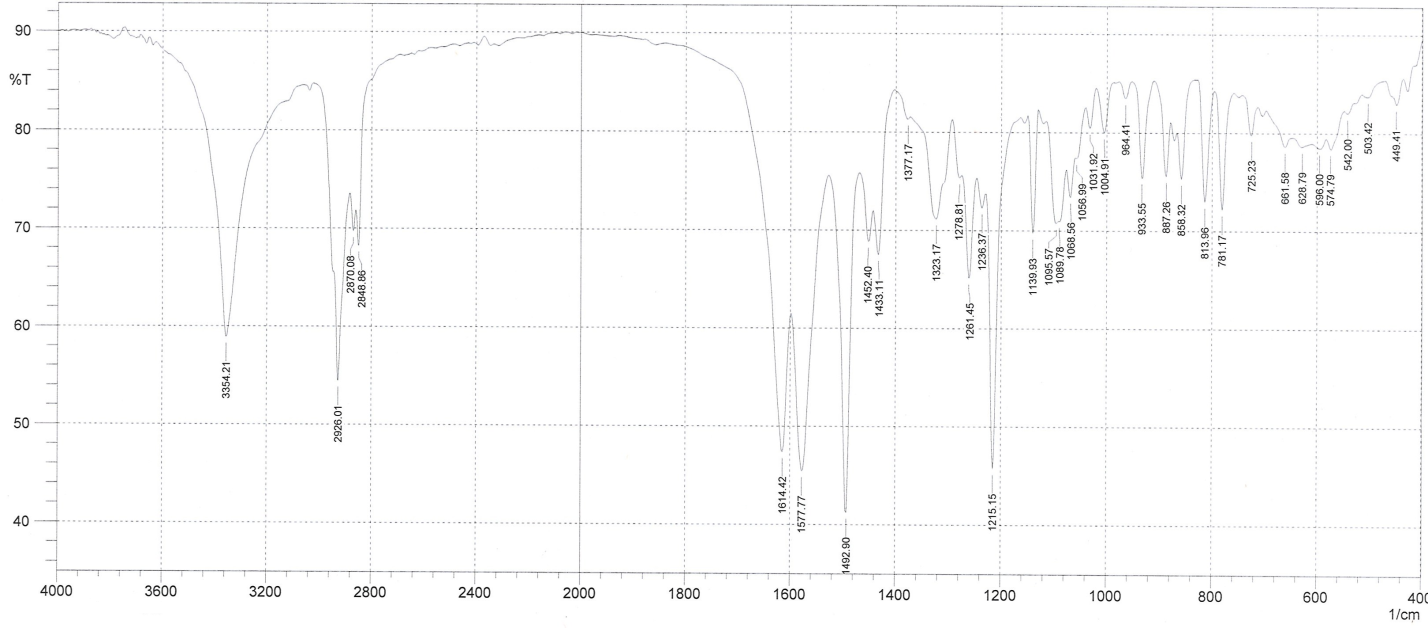


**Figure S 37:** FT-IR Spectrum of compound 1e


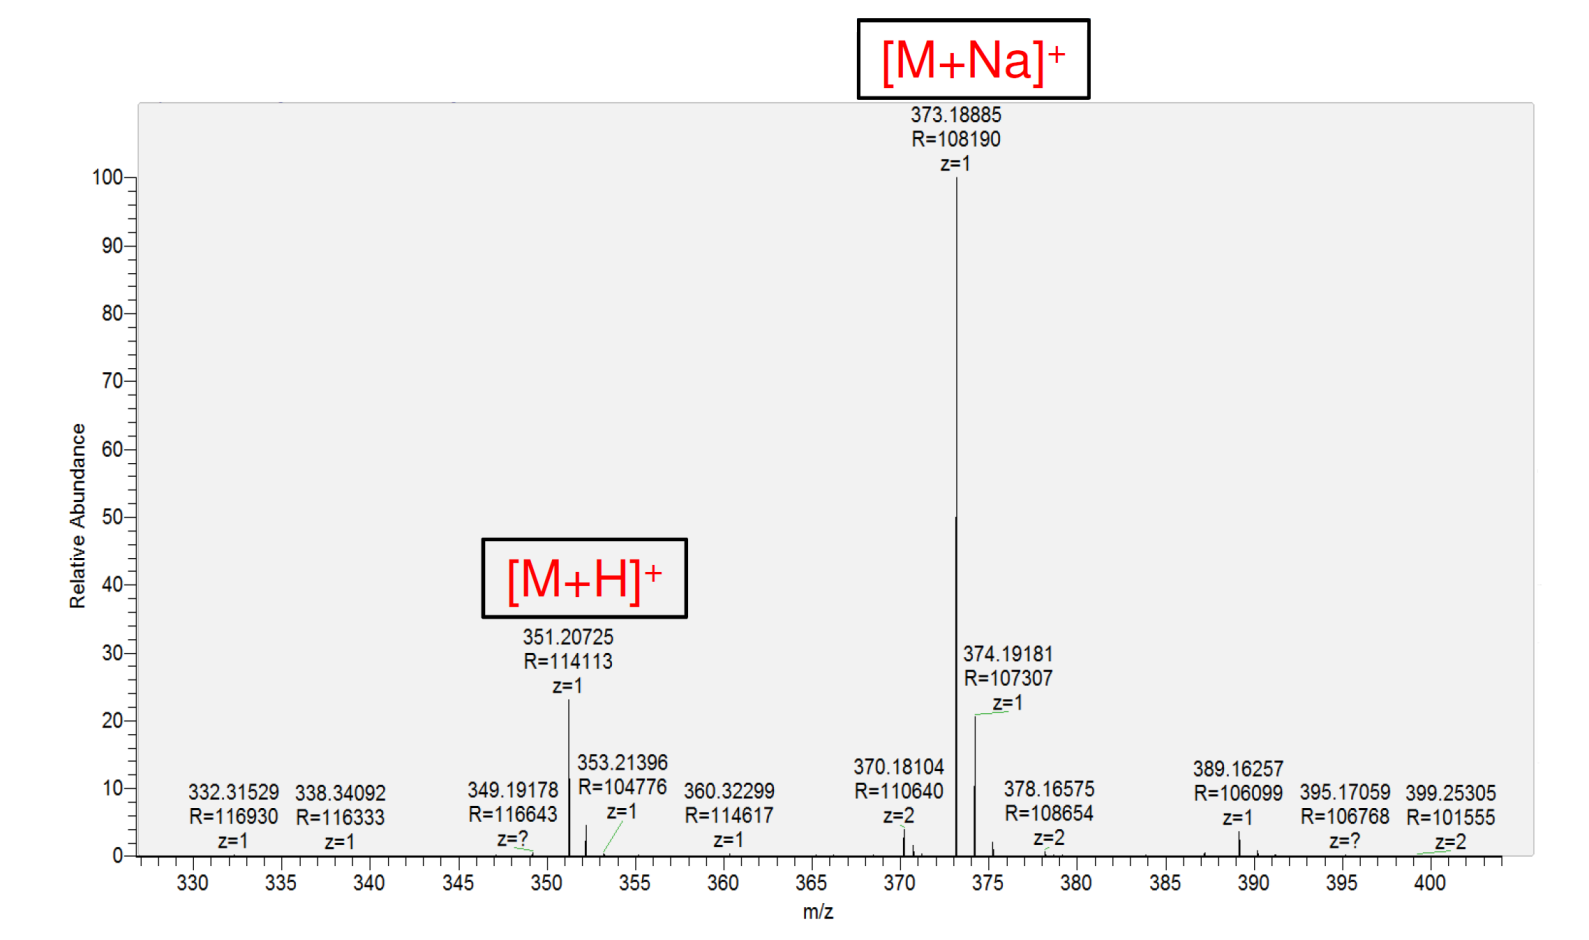


**Figure S 38:** HRMS Spectrum of compound 1e


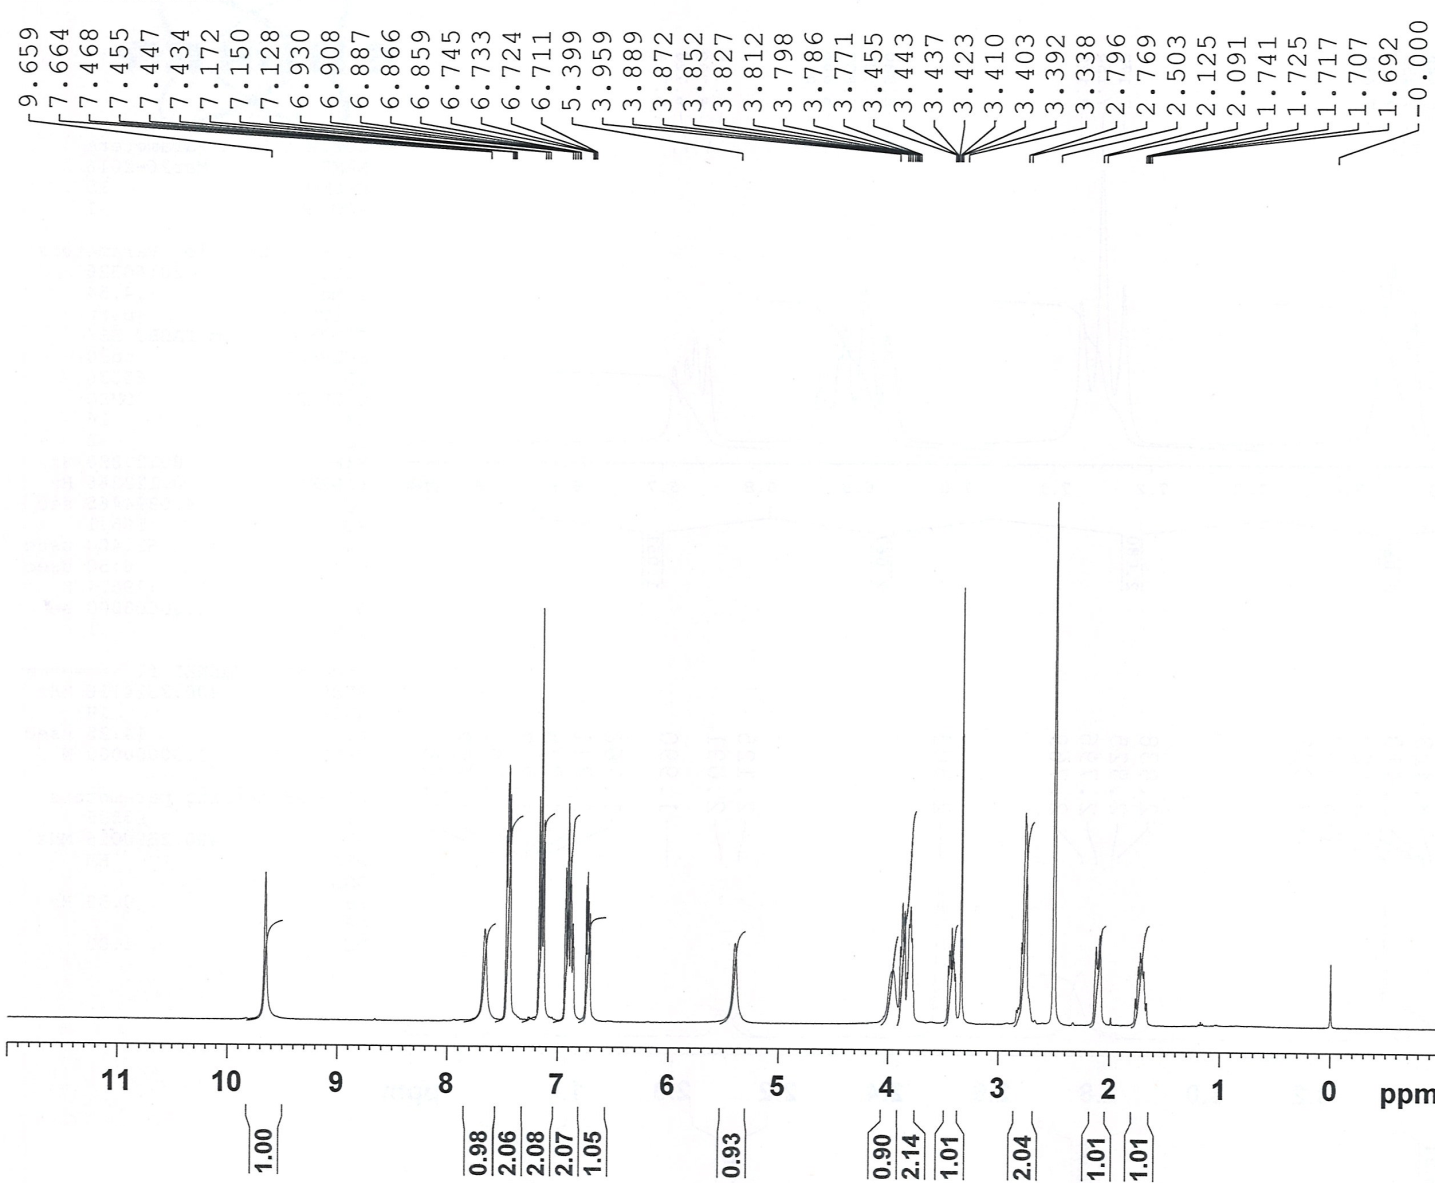


**Figure S 39:** 1H NMR Spectrum of compound 1f


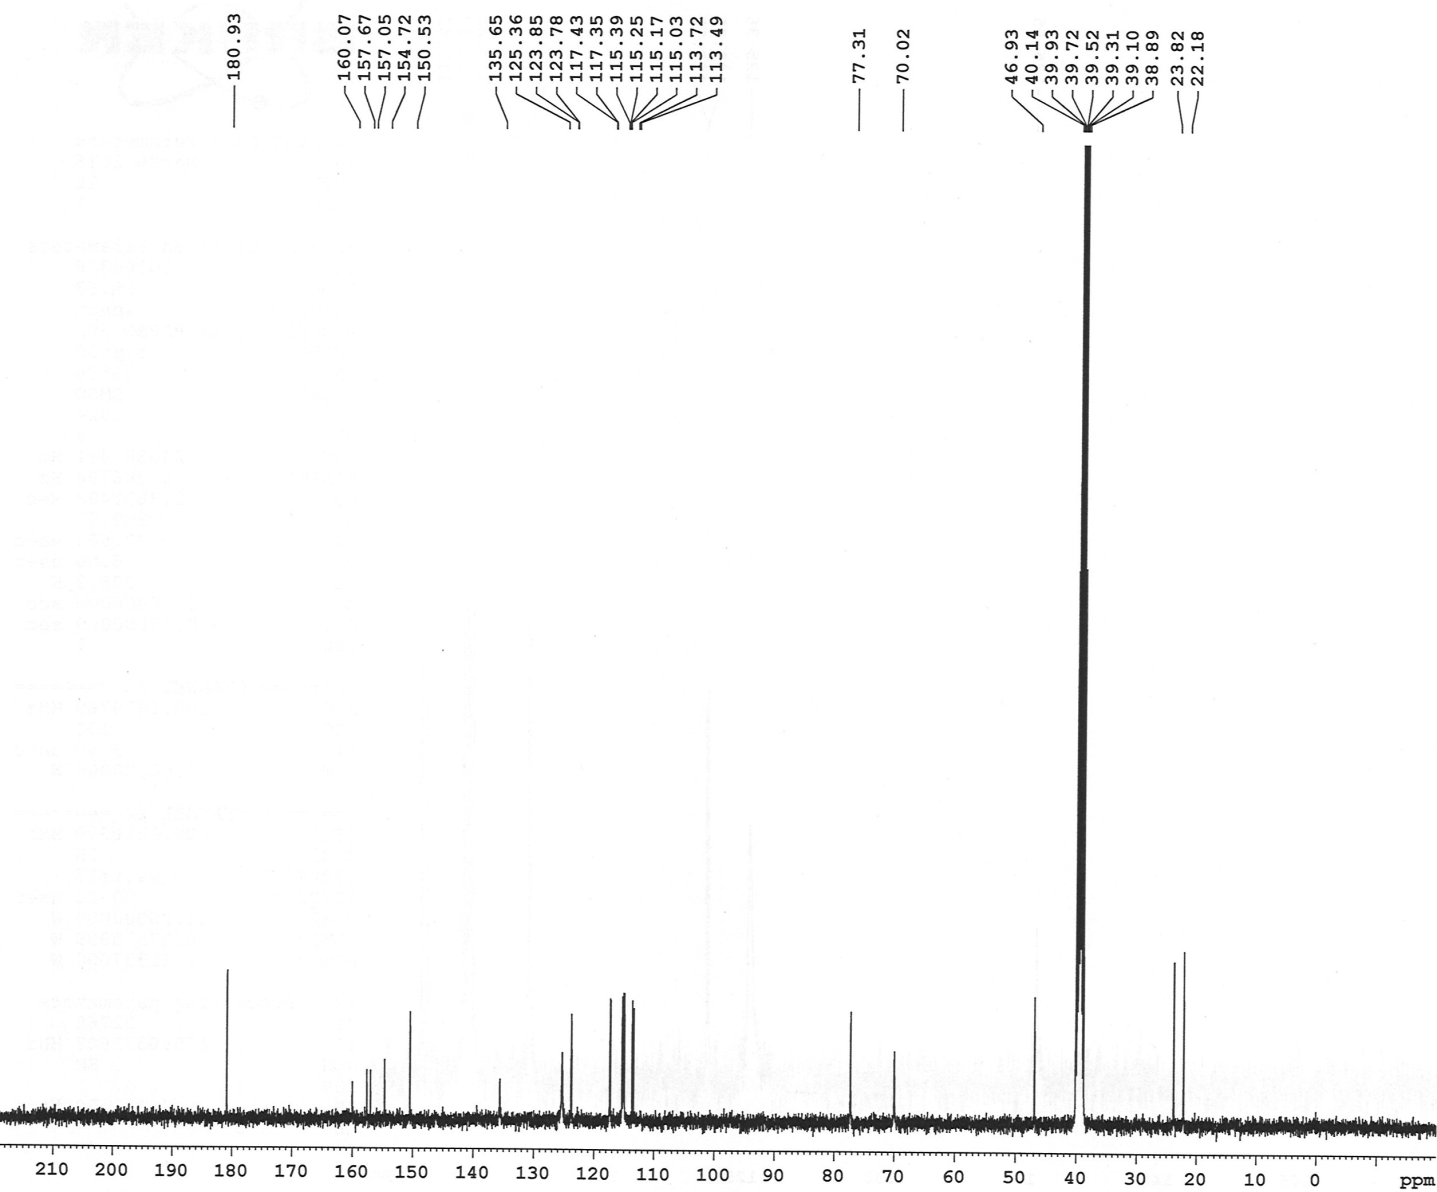


**Figure S 40:** 13C NMR Spectrum of compound 1f


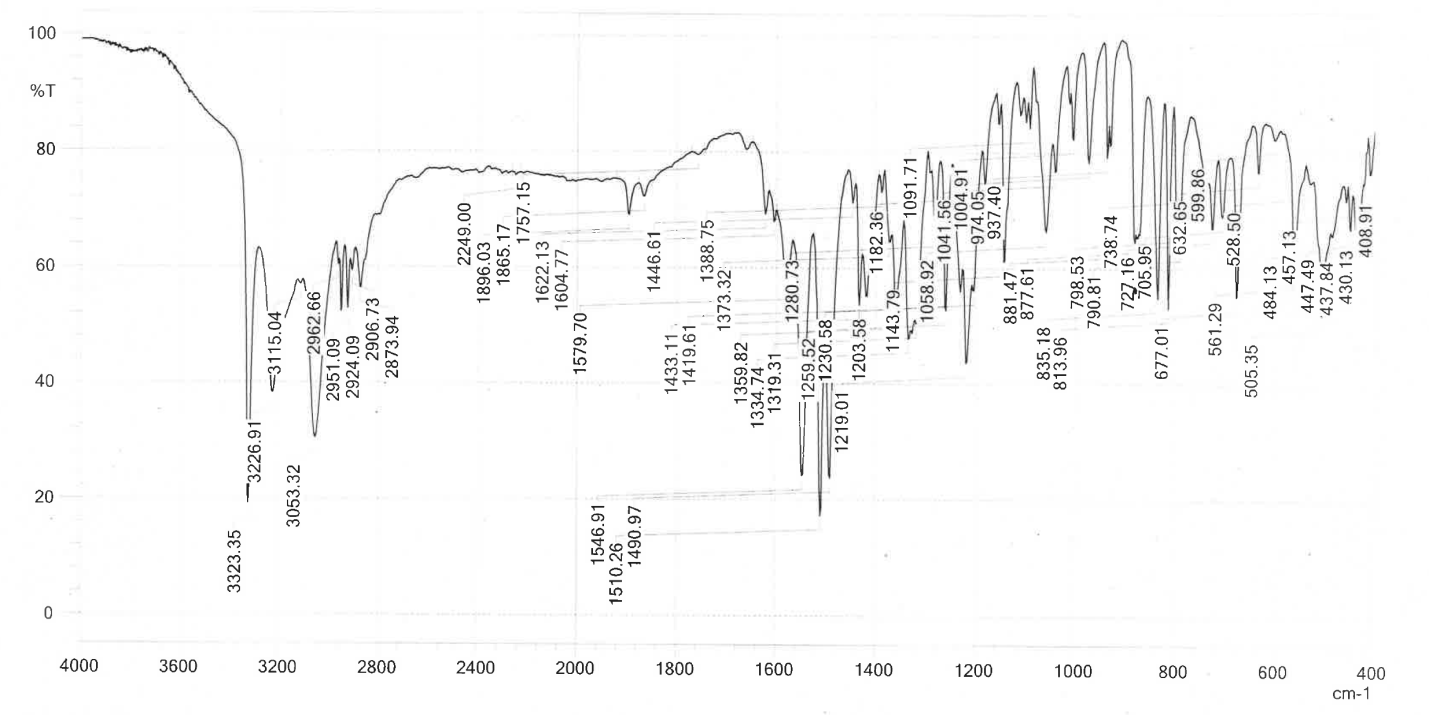


**Figure S 41:** FT-IR Spectrum of compound 1f


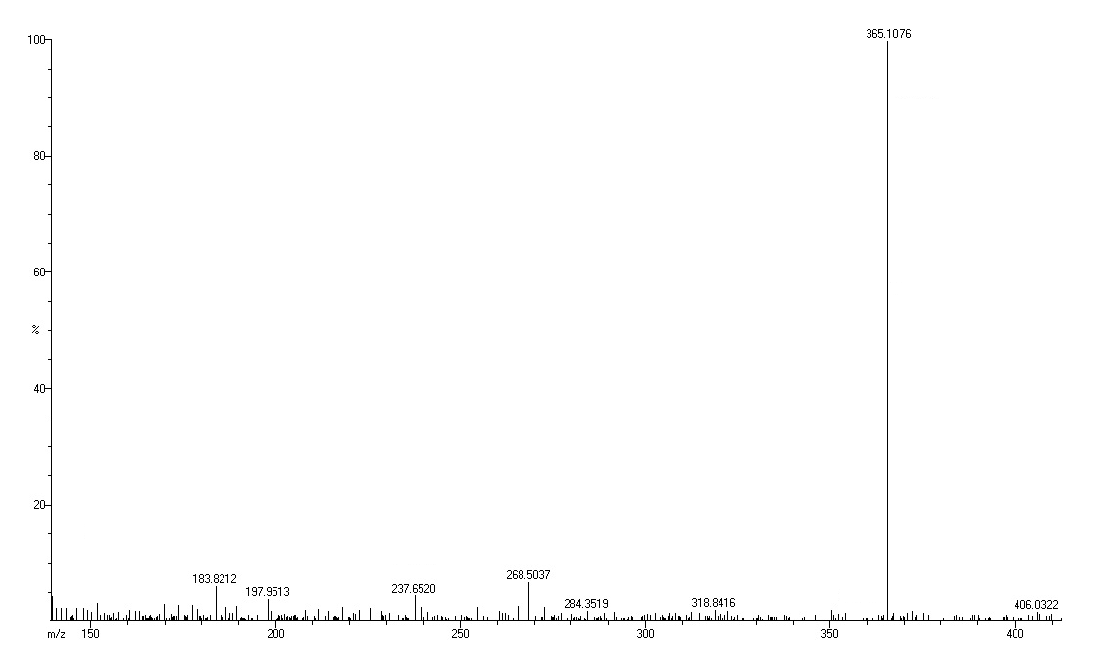


**Figure S 42:** Mass Spectrum of compound 1f


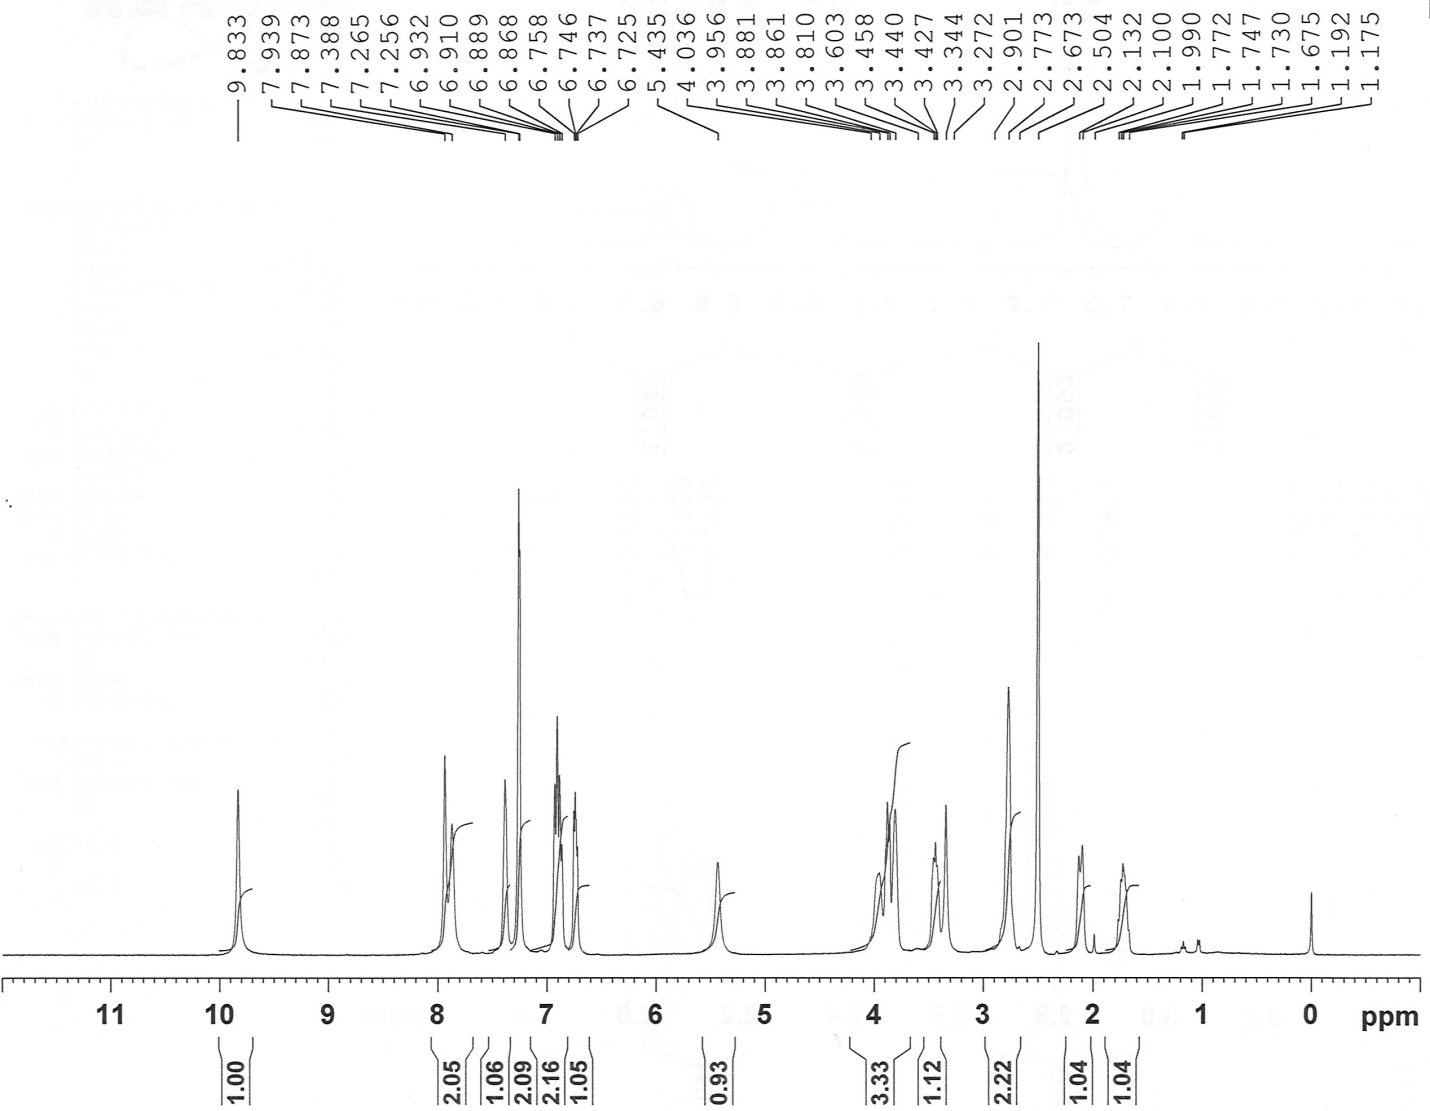


**Figure S 43:** 1H NMR Spectrum of compound 1g


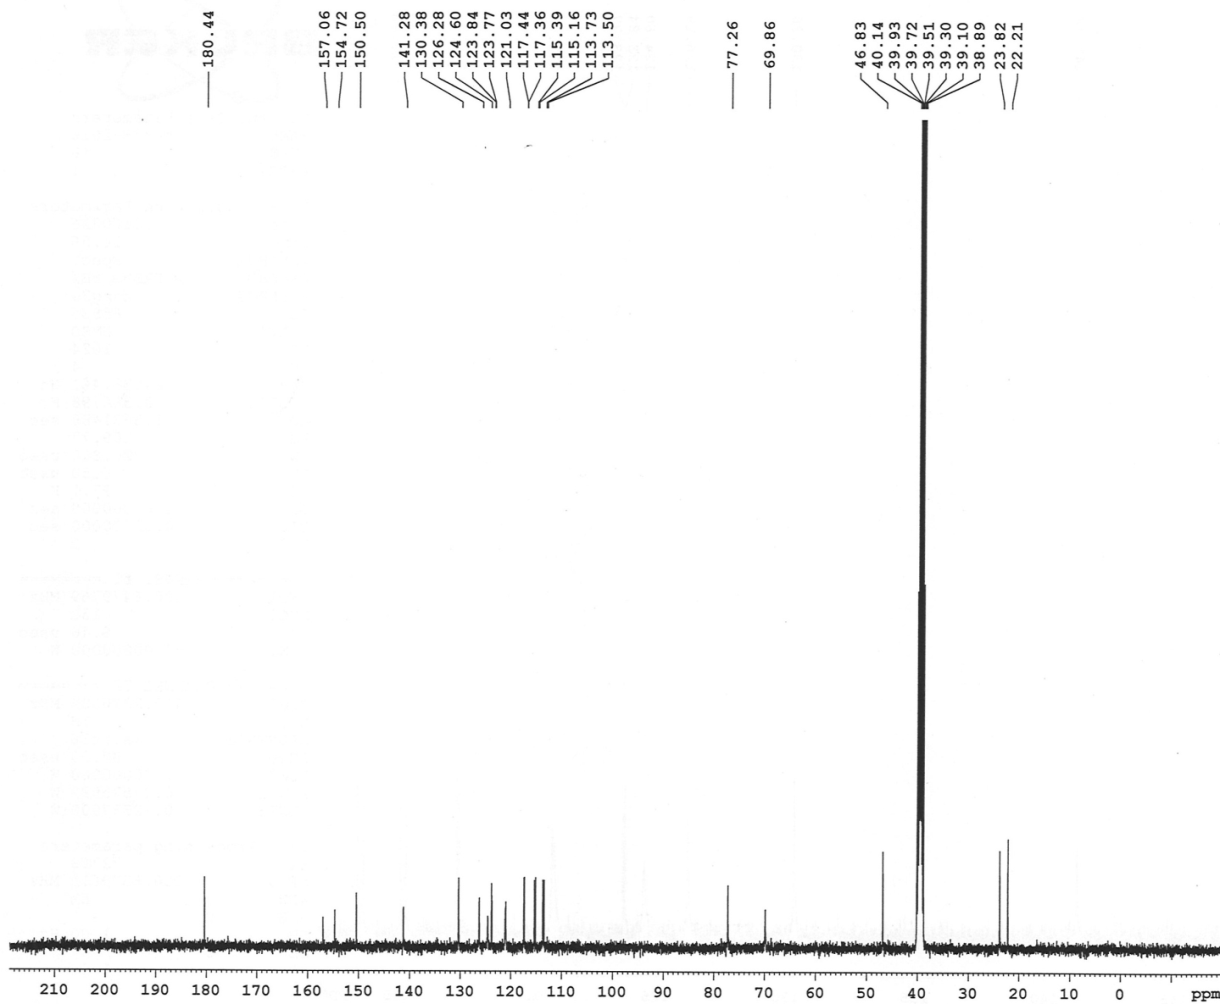


**Figure S 44:** 13C NMR Spectrum of compound 1g


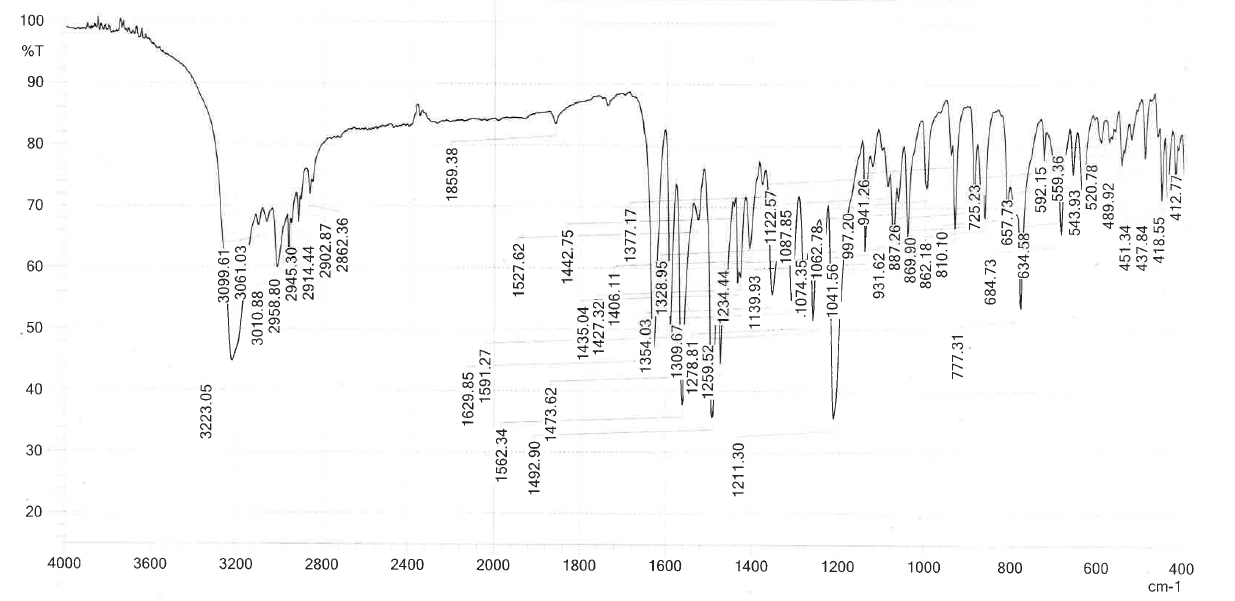


**Figure S 45:** FT-IR Spectrum of compound 1g


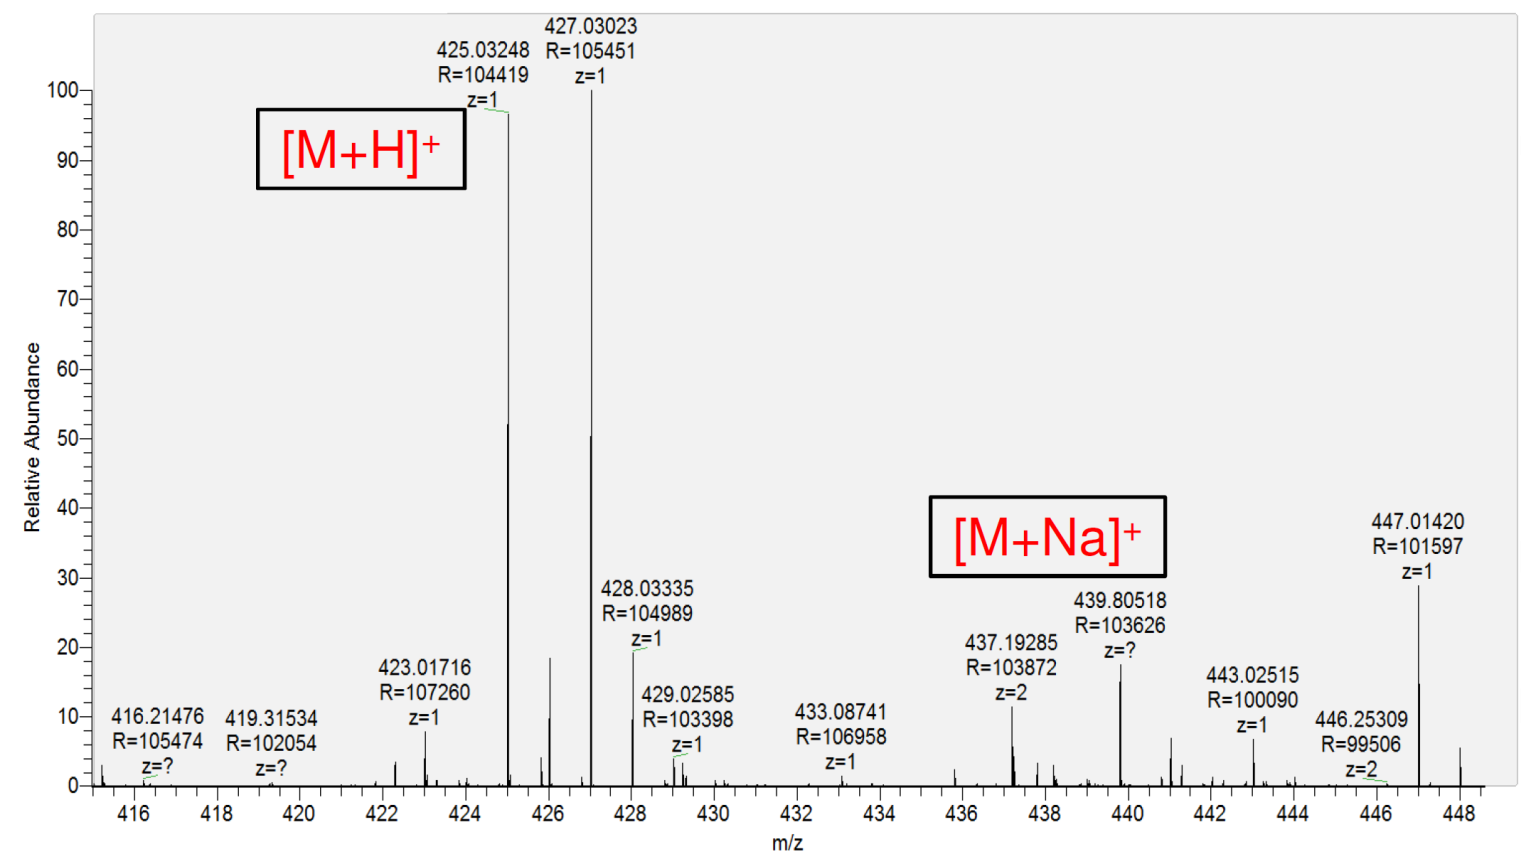


**Figure S 46:** HRMS Spectrum of compound 1g


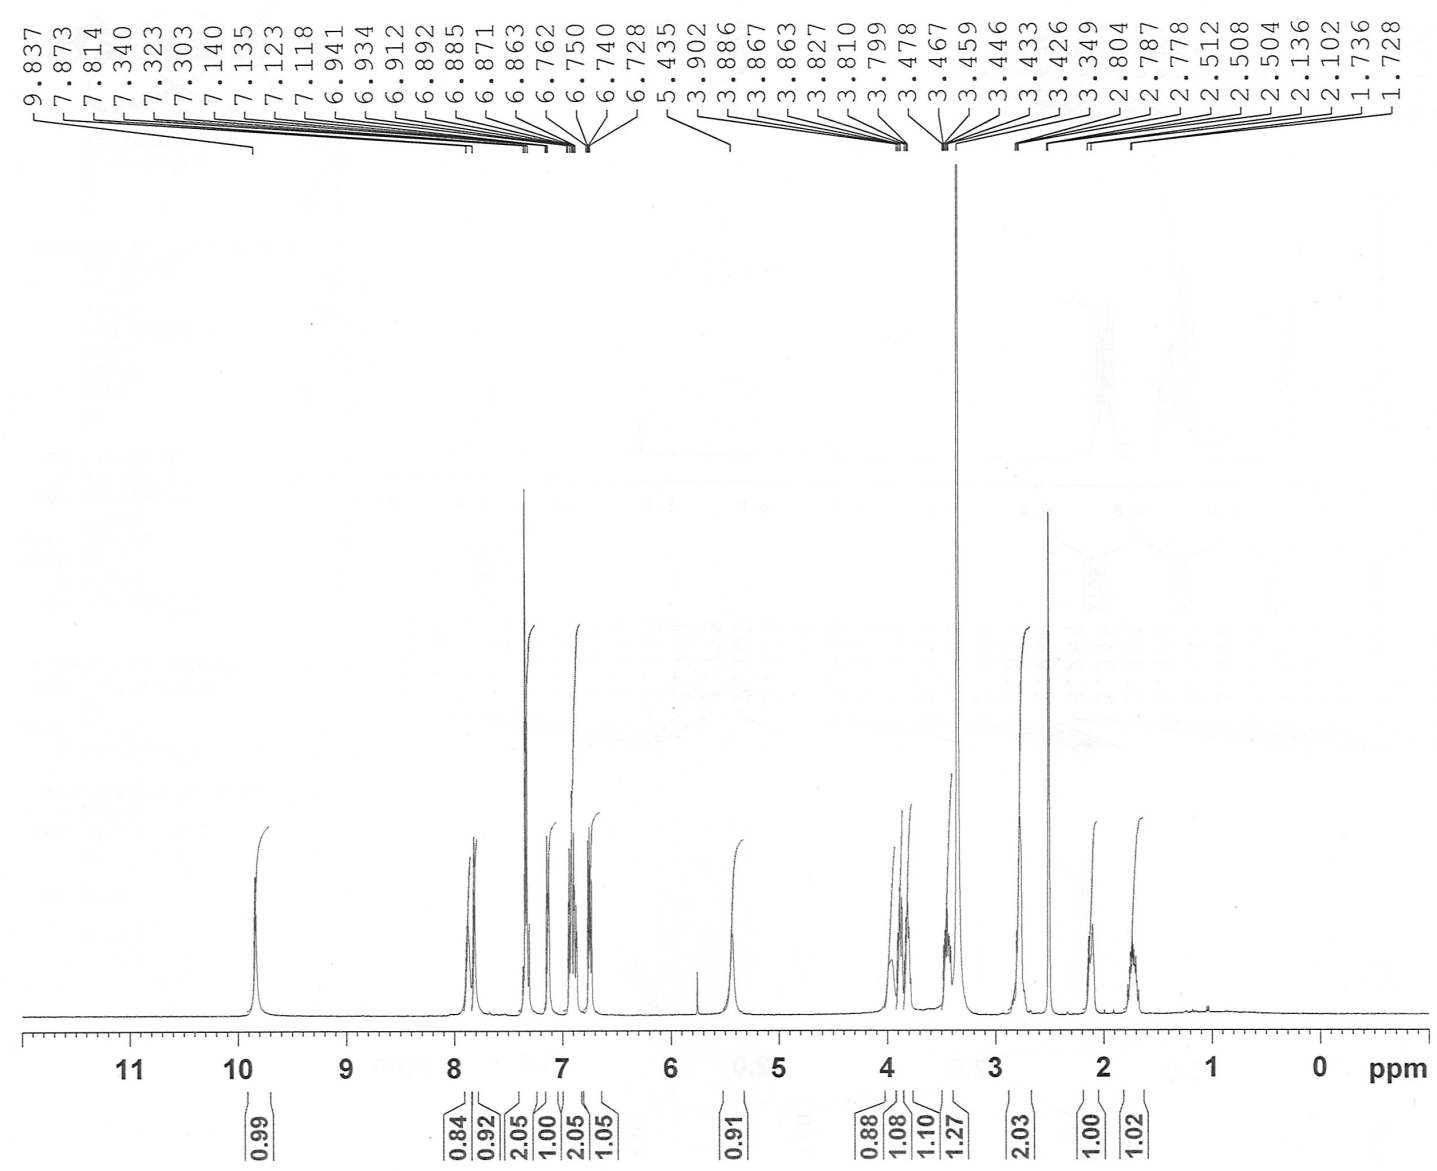


**Figure S 47:** 1H NMR Spectrum of compound 1h


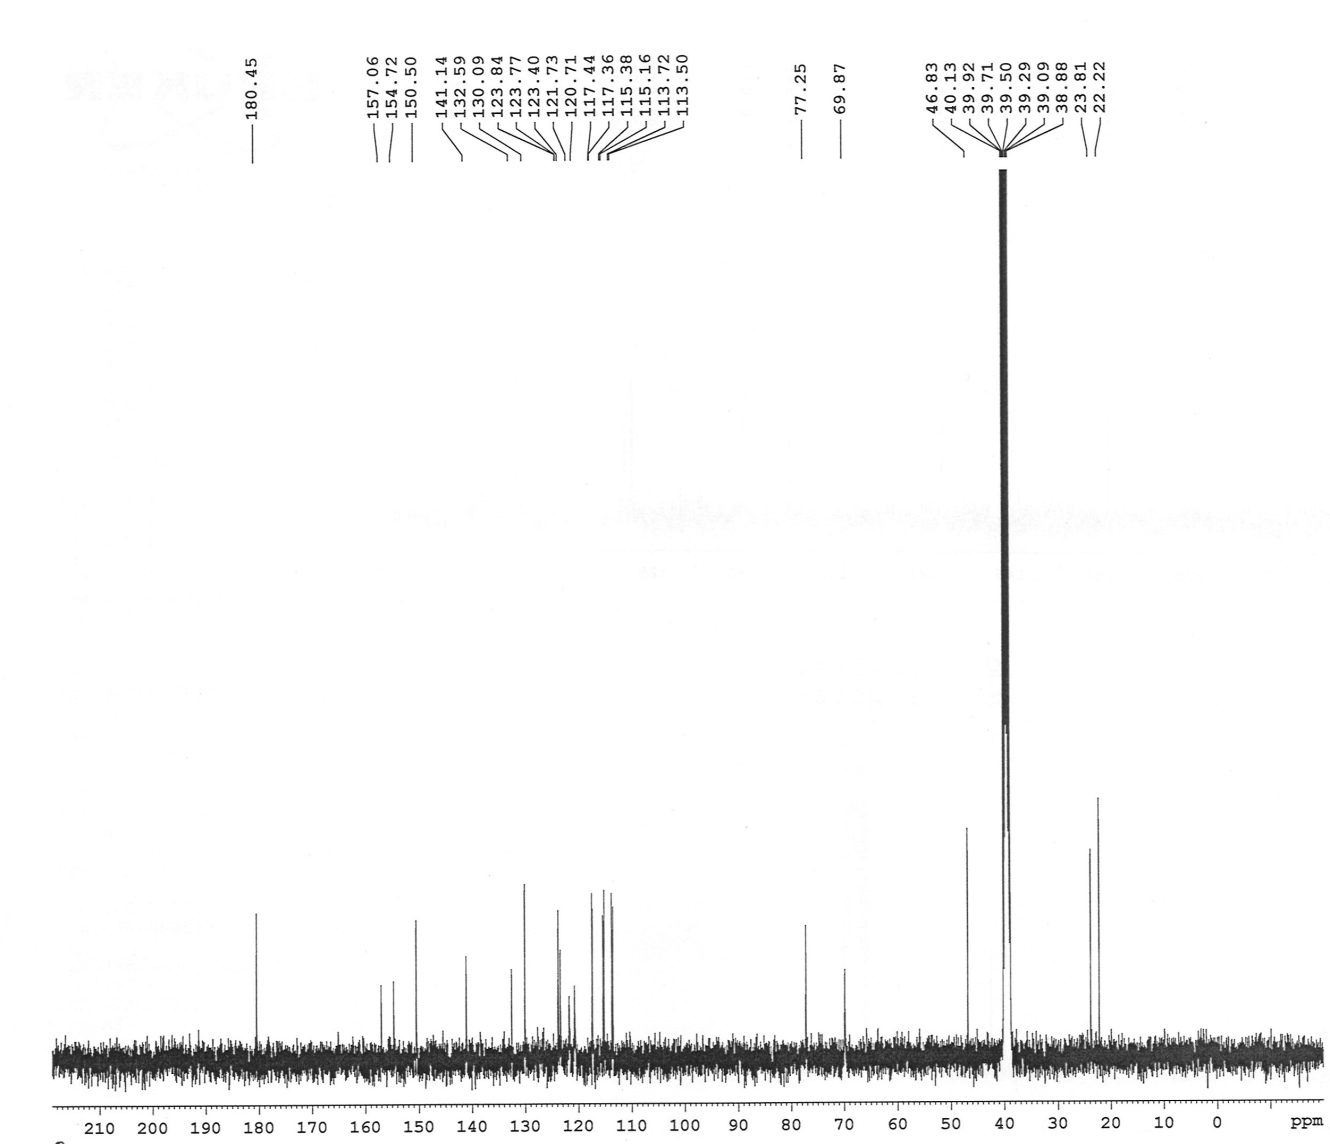


**Figure S 48:** 13C NMR Spectrum of compound 1h


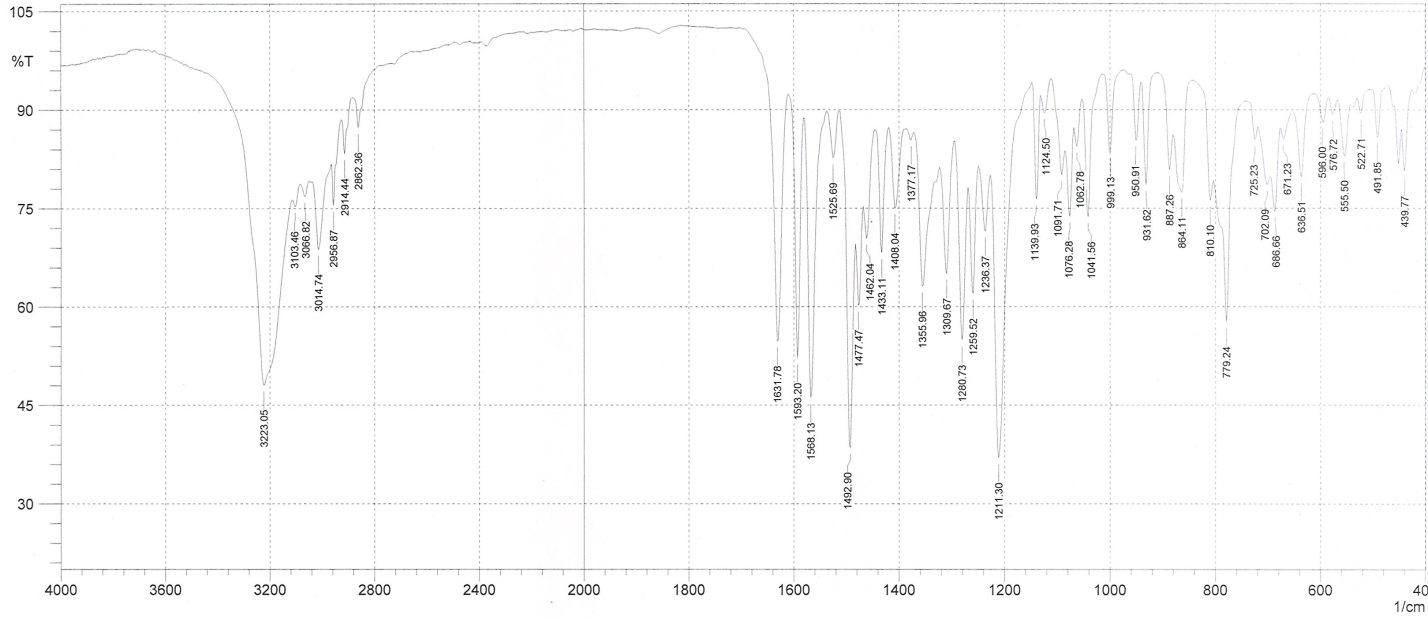


**Figure S 49:** FT-IR Spectrum of compound 1h


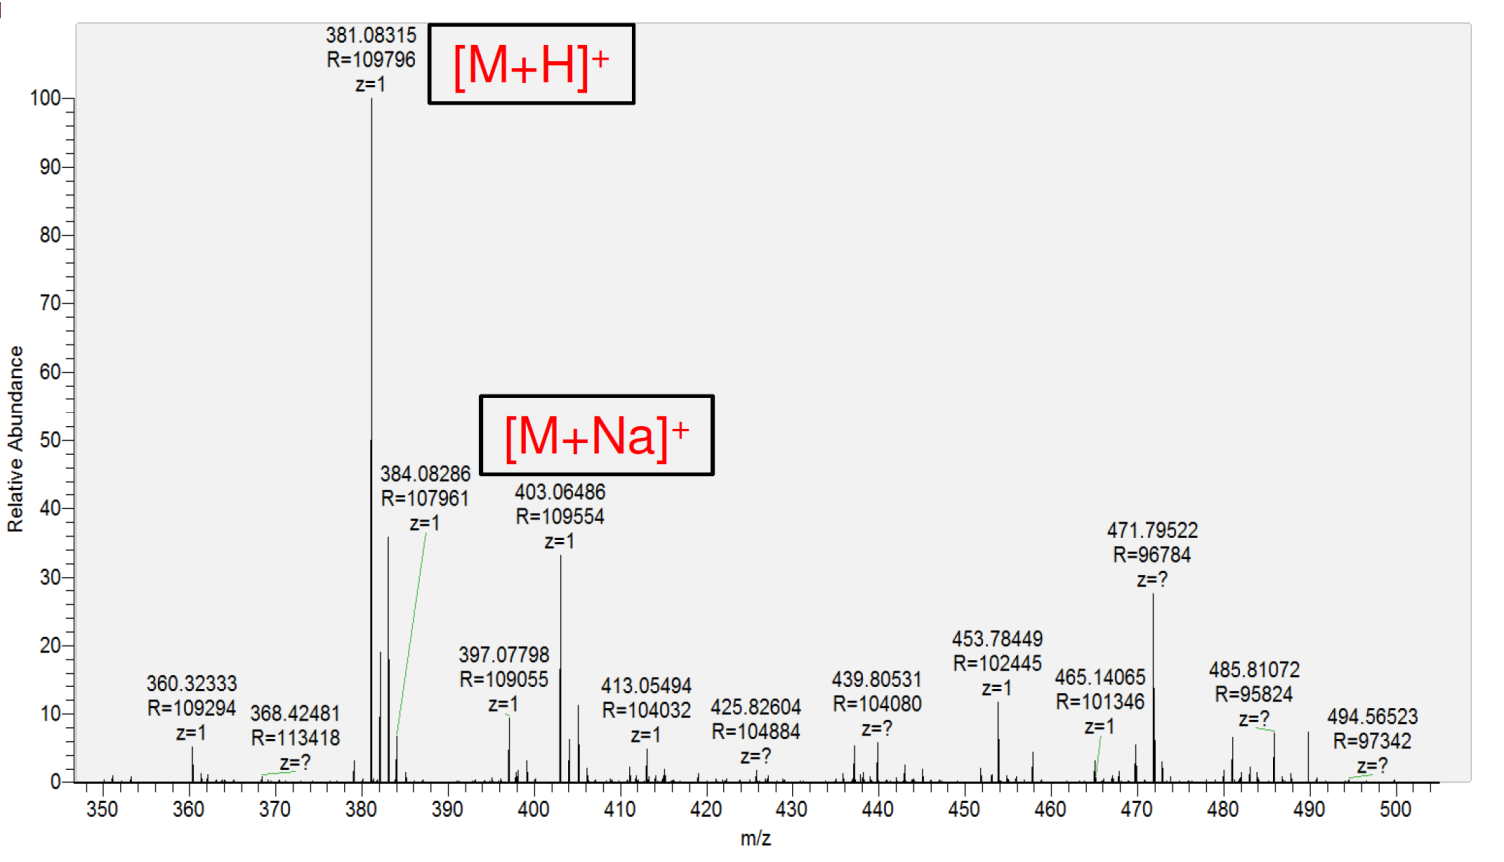


**Figure S 50:** HRMS Spectrum of compound 1h


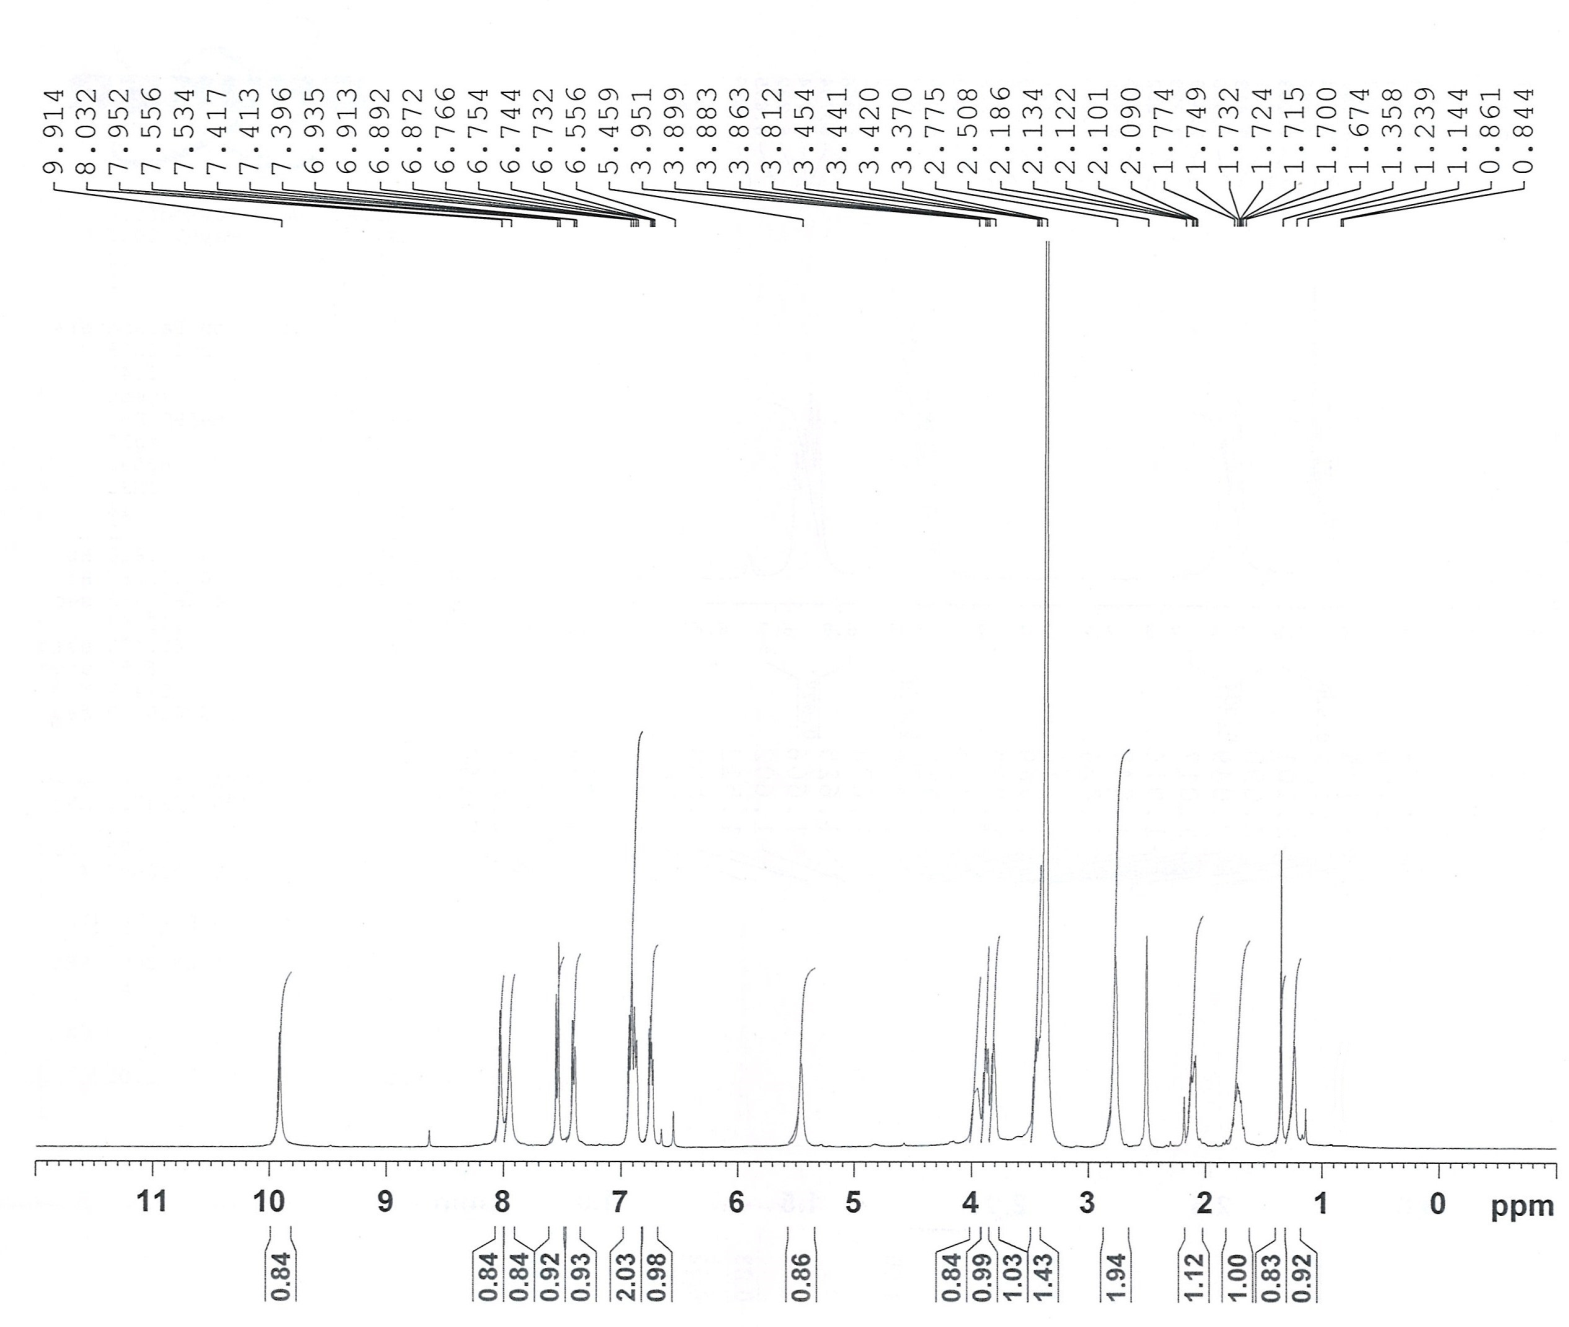


**Figure S 51:** 1H NMR Spectrum of compound 1i


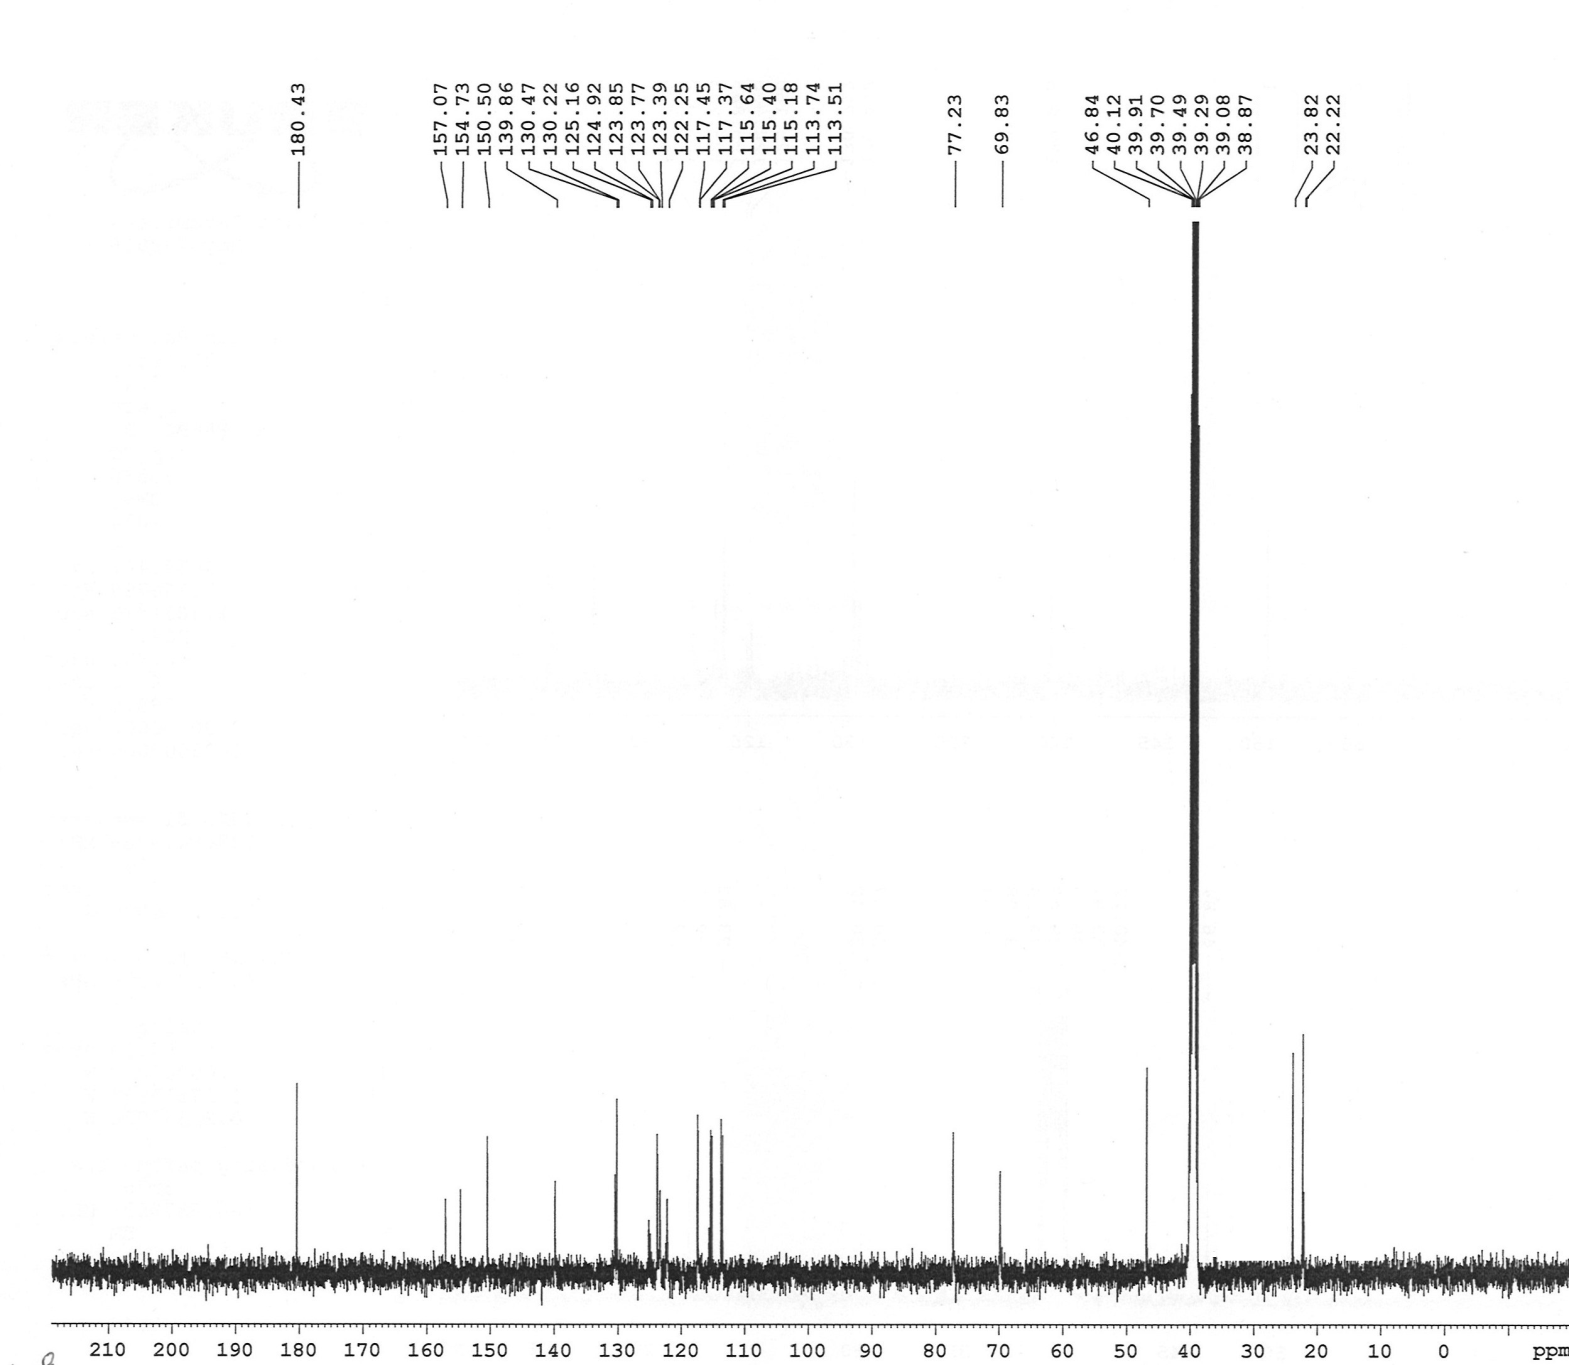


**Figure S 52:** 13C NMR Spectrum of compound 1i


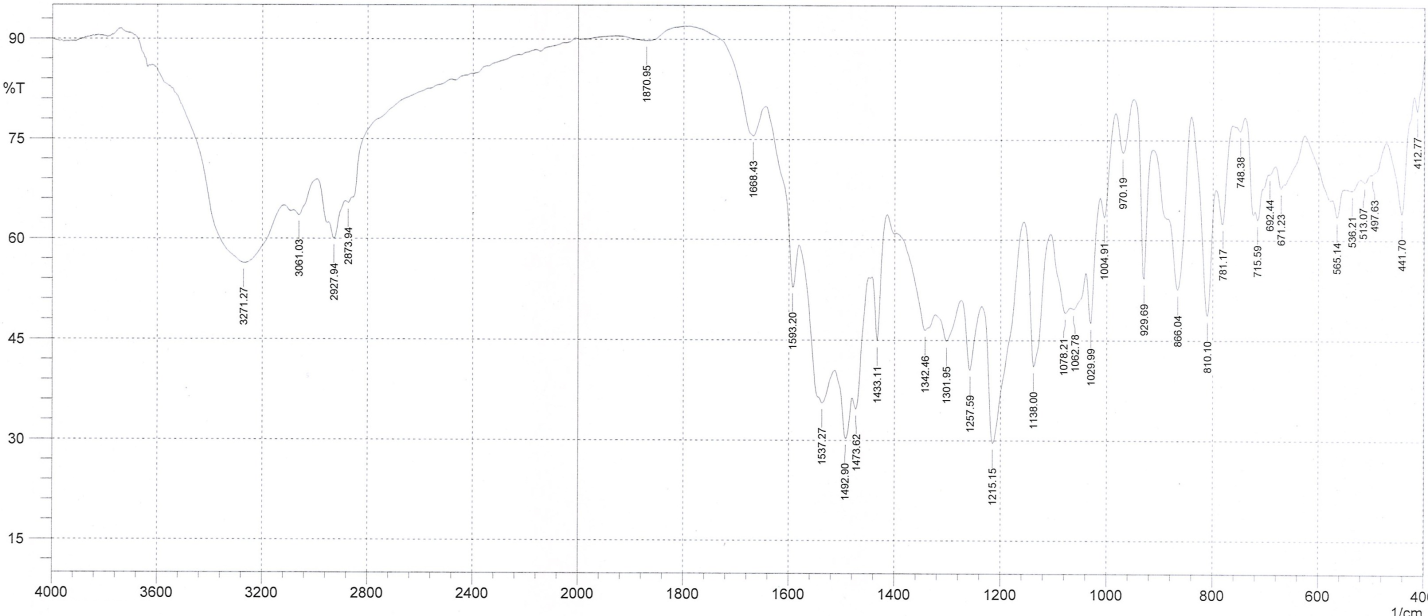


**Figure S 53:** FT-IR Spectrum of compound 1i


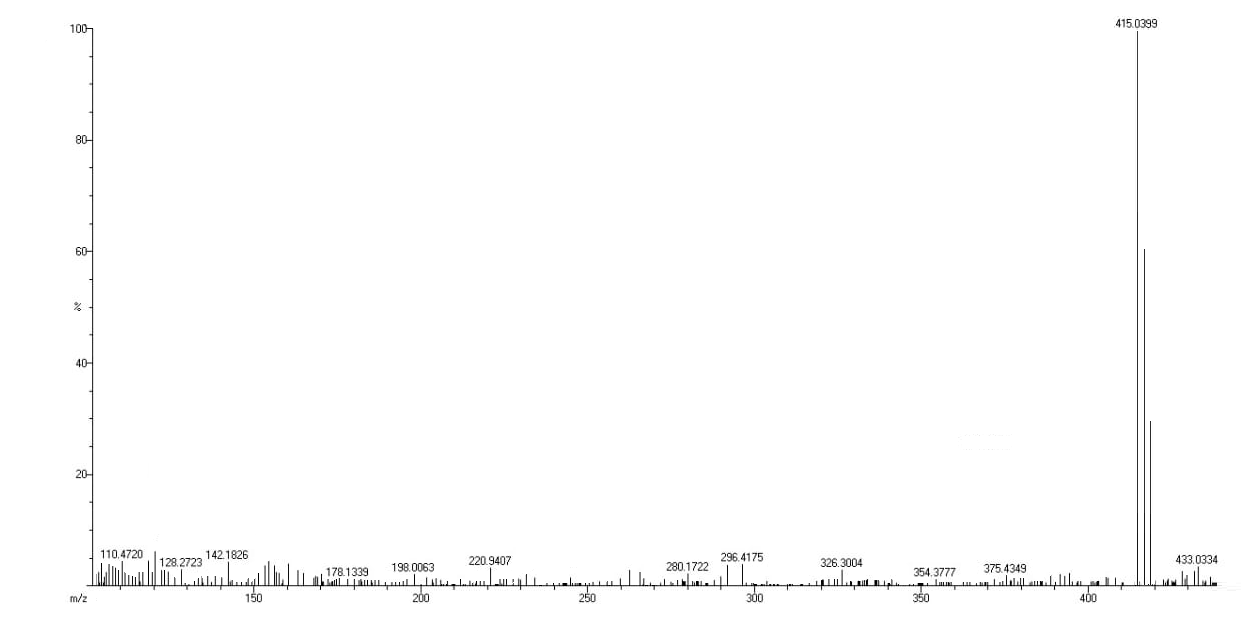


**Figure S 54:** Mass Spectrum of compound 1i


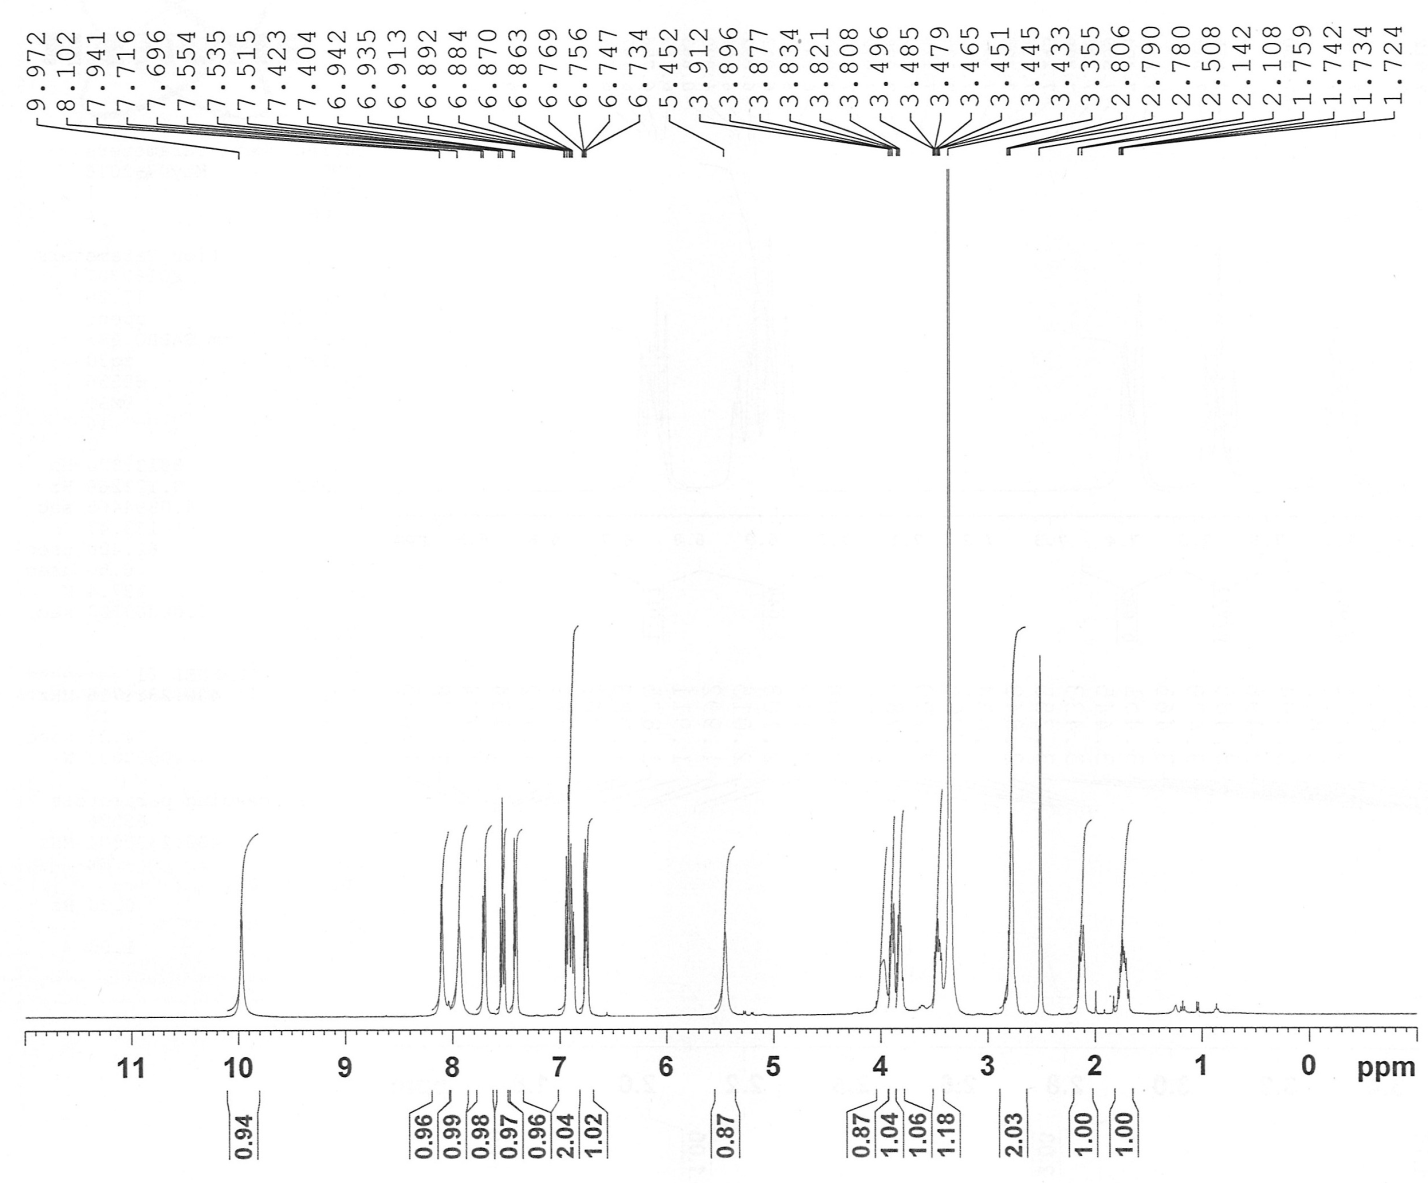


**Figure S 55:** 1H NMR Spectrum of compound 1j


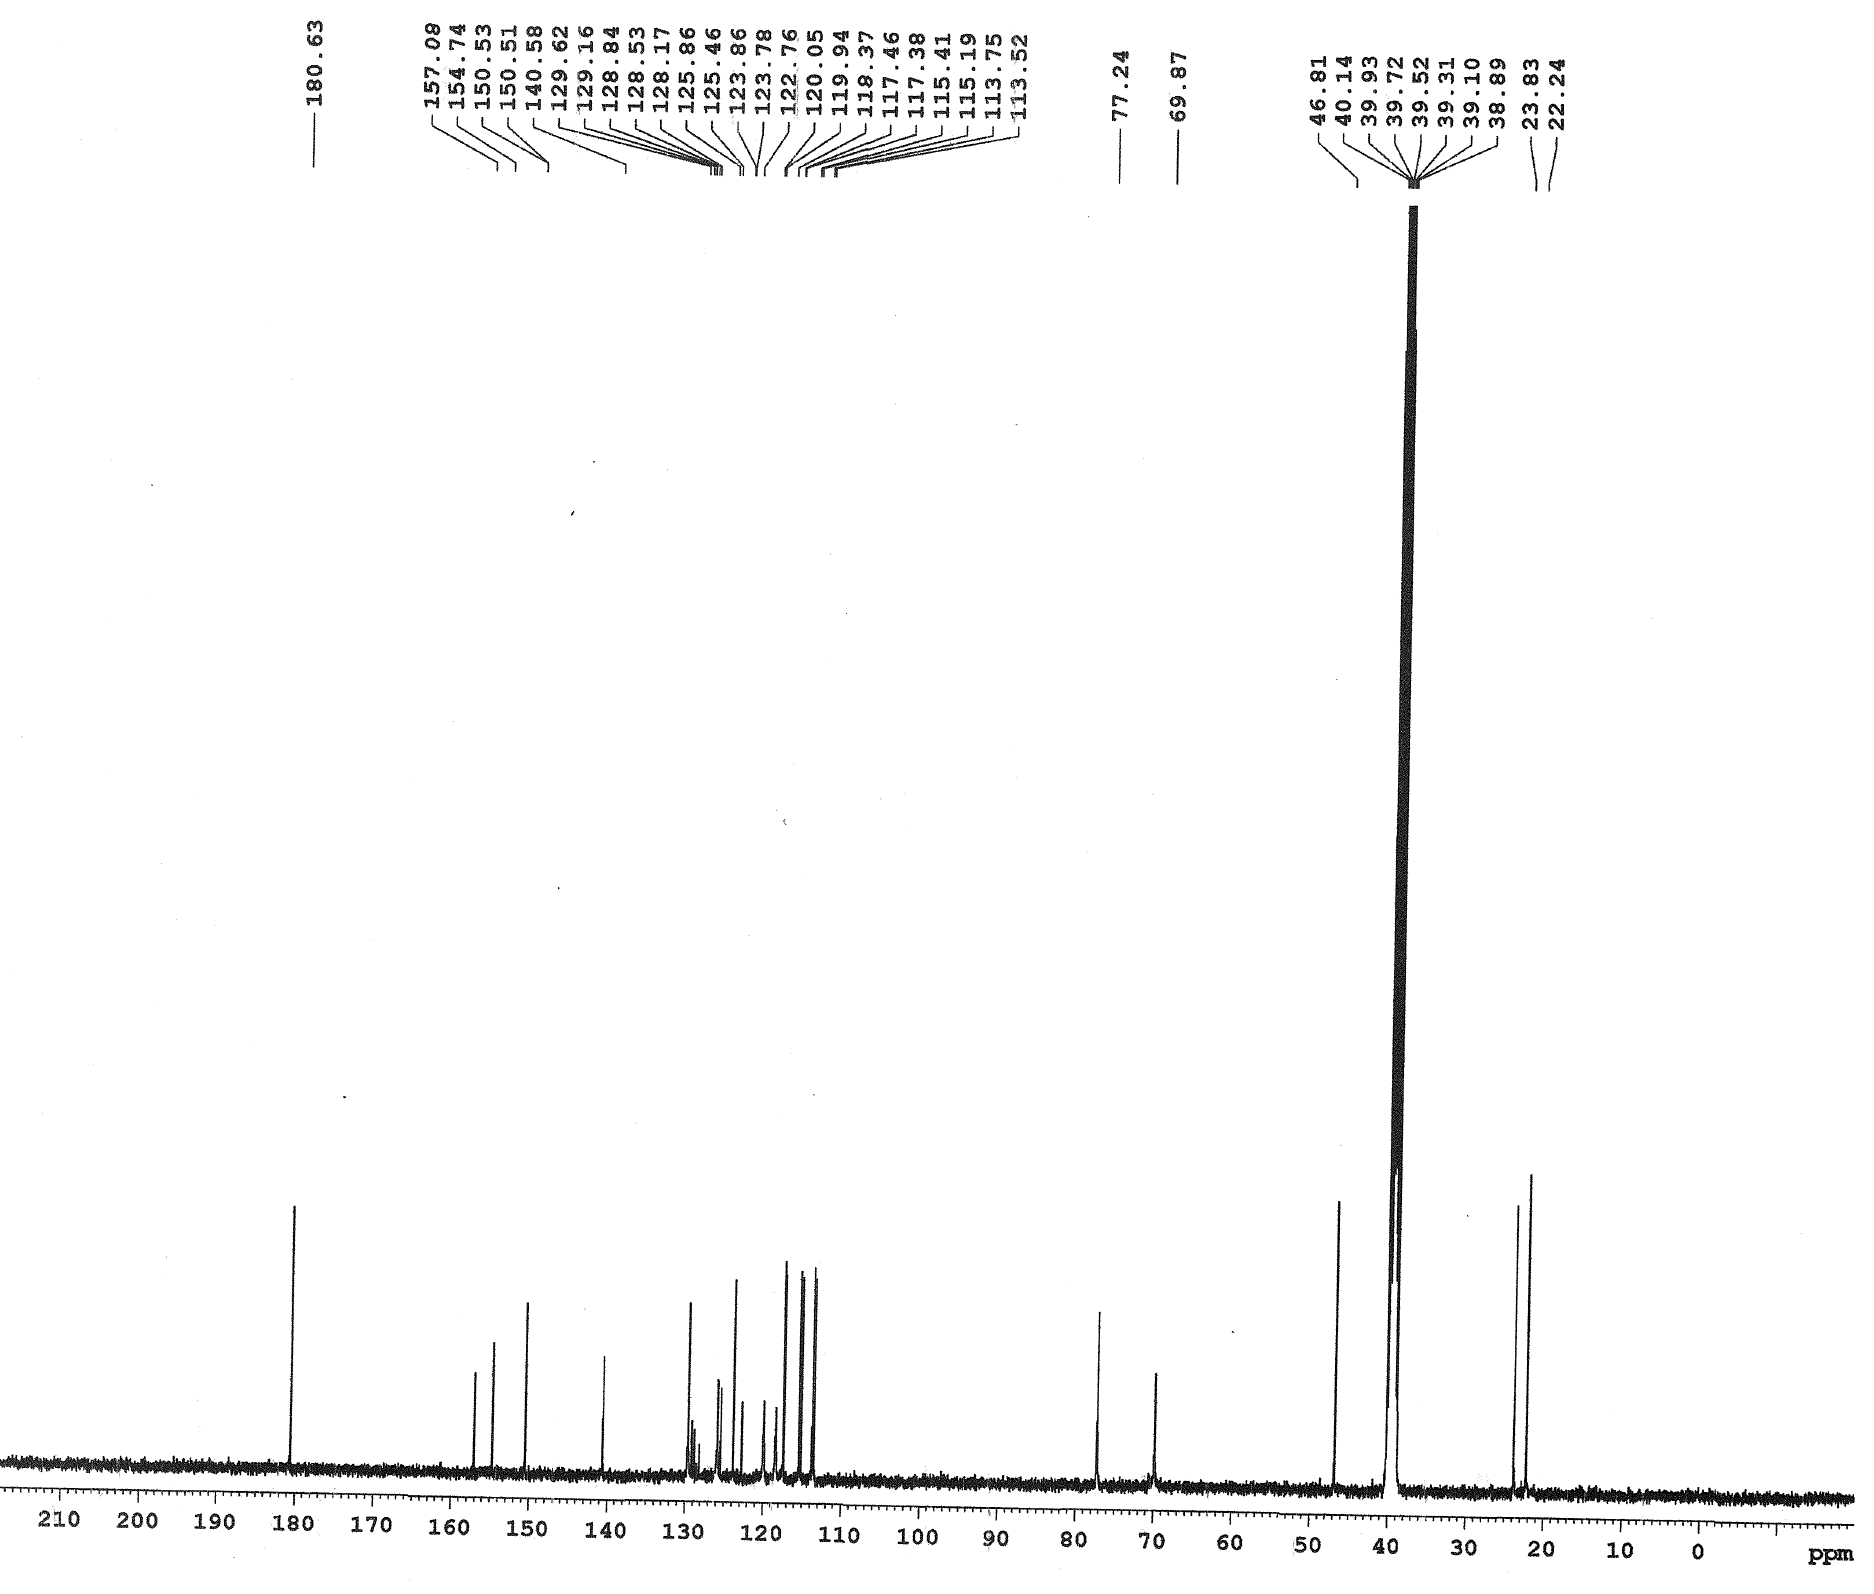


**Figure S 56:** 13C NMR Spectrum of compound 1j


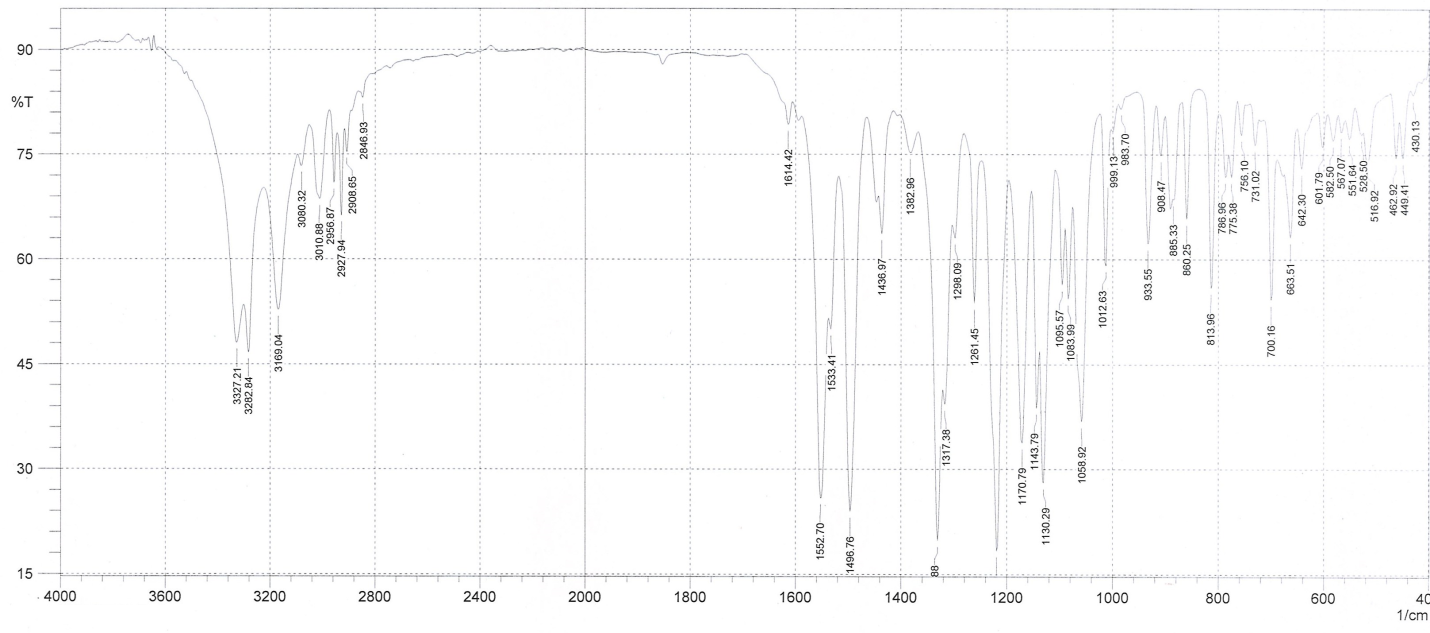


**Figure S 57:** FT-IR Spectrum of compound 1j


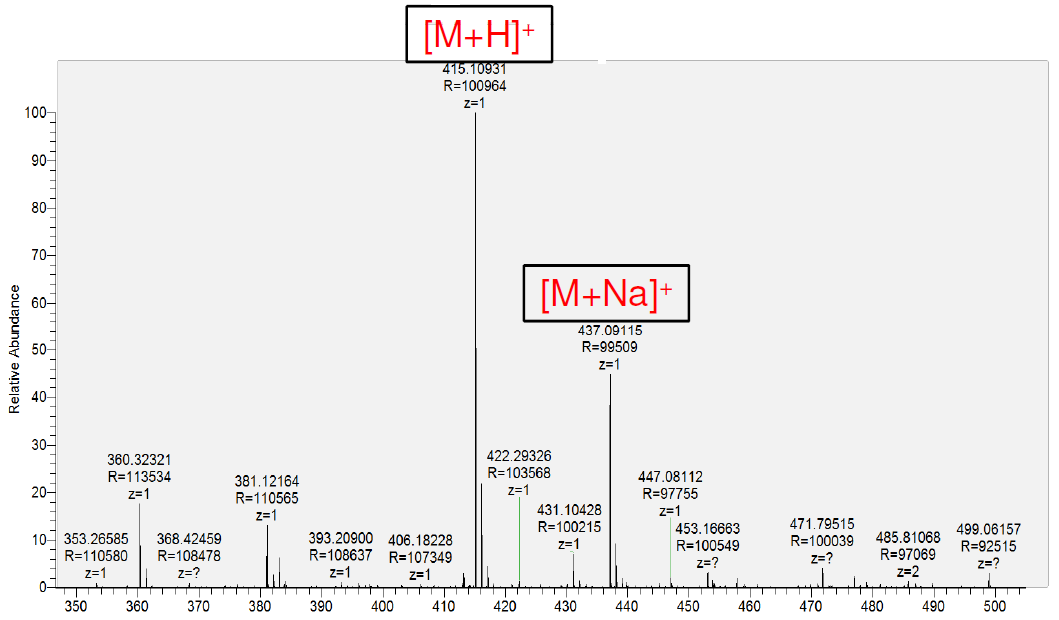


**Figure S 58:** HRMS Spectrum of compound 1j

**Table S 1:** Biological activity of synthesized compounds (1a-j) against Gram +Ve bacterial strains

| **Compd.** | **Diameter of zone of inhibition (in mm)** | | | | |
| --- | --- | --- | --- | --- | --- |
| ***S. aureus*** | | | ***B.cereus*** | |
| **50** | **100** | | **50** | **100** |
| ***µ*g /mL** | | | ***µ*g/ mL** | |
| **1a** | 12 | | 20 | 11 | 18 |
| **1b** | 3 | | 6 | 4 | 7 |
| **1c** | 0 | | 0 | 2 | 4 |
| **1d** | 10 | | 18 | 9 | 17 |
| **1e** | 1 | | 2 | 0 | 0 |
| **1f** | 5 | | 7 | 6 | 10 |
| **1g** | 2 | | 4 | 1 | 2 |
| **1h** | 2 | | 3 | 4 | 6 |
| **1i** | 0 | | 0 | 4 | 7 |
| **1j** | 1 | | 2 | 0 | 0 |
| Ciprofloxacin | 14 | | 22 | 13 | 21 |

**Table S 2:** Biological activity of synthesized compounds (1a-j) against Gram -Ve bacterial strains

| **Compd.** | **Diameter of zone of inhibition (in mm)** | | | | | | | |
| --- | --- | --- | --- | --- | --- | --- | --- | --- |
| ***E.coli*** | | | ***A. baumannii*** | | | ***P. aeruginosa*** | |
| **50** | **100** | | **50** | **100** | | **50** | **100** |
| ***µ*g/ mL** | | | **µg/ mL** | | | **µg/ mL** | |
| **1a** | 12 | | 20 | 10 | | 19 | 11 | 21 |
| **1b** | 2 | | 3 | 2 | | 3 | 1 | 3 |
| **1c** | 1 | | 2 | 3 | | 5 | 2 | 3 |
| **1d** | 11 | | 21 | 8 | | 17 | 9 | 22 |
| **1e** | 2 | | 3 | 0 | | 0 | 0 | 0 |
| **1f** | 4 | | 8 | 6 | | 12 | 4 | 10 |
| **1g** | 0 | | 0 | 2 | | 3 | 0 | 0 |
| **1h** | 4 | | 7 | 3 | | 6 | 2 | 3 |
| **1i** | 3 | | 5 | 0 | | 0 | 0 | 0 |
| **1j** | 2 | | 4 | 2 | | 5 | 0 | 0 |
| Ciprofloxacin | 14 | | 24 | 13 | | 22 | 14 | 25 |

**Table S 3:** Biological activity of synthesized compounds (1a-j) against fungal strains

| **Compd.** | **Diameter of zone of inhibition (in mm)** | | | | | | |
| --- | --- | --- | --- | --- | --- | --- | --- |
| ***A.niger*** | | ***F.oxysporum*** | | | ***A.foetidus*** | |
| **50** | **100** | **50** | **100** | | **50** | **100** |
| ***µ*g /mL** | | ***µ*g /mL** | | | ***µ*g /mL** | |
| **1a** | 0 | 0 | 0 | | 0 | 1 | 2 |
| **1b** | 5 | 9 | 6 | | 13 | 2 | 4 |
| **1c** | 3 | 5 | 4 | | 7 | 3 | 6 |
| **1d** | 3 | 6 | 4 | | 7 | 4 | 6 |
| **1e** | 0 | 0 | 0 | | 0 | 0 | 0 |
| **1f** | 4 | 7 | 5 | | 11 | 5 | 10 |
| **1g** | 0 | 0 | 2 | | 3 | 1 | 3 |
| **1h** | 12 | 21 | 12 | | 22 | 11 | 21 |
| **1i** | 2 | 4 | 4 | | 7 | 3 | 5 |
| **1j** | 11 | 20 | 12 | | 20 | 10 | 20 |
| **Fluconazole** | 14 | 22 | 16 | | 23 | 14 | 23 |

**Table S 4: Minimum inhibitory concentration (MIC) of lead compounds (*1a, 1d, 1h* and *1j*) against bacterial strains and fungal strains (µg/mL)**

| **Compd.** | **Bacterial strains** | | | | | **Fungal strains** | | |
| --- | --- | --- | --- | --- | --- | --- | --- | --- |
| ***S.aureus*** | ***B.cereus*** | ***A. baumannii*** | ***E. coli*** | ***p.aeruginosa*** | ***A.nigar*** | ***F. Oxys porum*** | ***A.Foe tidus*** |
| **1a** | 4 | 4 | 4 | 5 | 5 | -  -  - | | |
| **1d** | 4 | 6 | 4 | 7 | 6 | -  -  - | | |
| **1h** | -- | | | | | 5 | 4 | 3 |
| **1j** | -- | | | | | 4 | 6 | 4 |
| Ciprofloxacin | **2** | **2** | **2** | **3** | **2** | -- | | |
| Fluconazole | - | | | | | **3** | **3** | **2** |

**References**

1. Devi, R.; Das, S. K. Studies directed toward the exploitation of vicinal diols in the synthesis of (+)-nebivolol intermediates. *Beilstein J. Org. Chem.*  2017, 13, 571-578. DOI: 10.3762/bjoc.13.56.
2. Chandrasekhar, S.; Reddy, M. V. Enantioselective total synthesis of the Antihypertensive Agent (*S*, *R*, *R*, *R*)-Nebivolol. *Tetrahedron* 2000, *56*, 6339-6344. DOI: 10.1016/S0040-4020(00)00572-X.
3. Bai, Y.; Chen, X. A mild synthesis of α, α′-[iminobismethylene] bis [6-fluoro-3, 4-dihydro-2 H-1-benzopyran-2-methanol]. *J. Chem. Res*. 2006, 807-808. DOI: 10.3184/030823406780199802.
